# Supplementary material for: Questioning the γ-gauche effect: stereoassignment of 1,3-disubstituted-tetrahydro-β-carbolines using1H–1H coupling constants
Source: Royal Society of Chemistry journal article supplement (doi:10.1039/c9ob01139k), 2019-01-01
Supplement: c9ob01139k1.pdf [file c9ob01139k1.pdf]

Electronic Supplementary Information for the manuscript entitled:

## Questioning the $\gamma$ -gauche effect: stereoassignment of 1,3-disubstituted-tetrahydro- $\beta$ -carboline using $^1\text{H}$ - $^1\text{H}$ coupling constants

Kristýna Cagašová, Maryam Ghavami, Zhongke Yao, and Paul R. Carlier

Department of Chemistry and Virginia Tech Center for Drug Discovery, Virginia Tech, Hahn Hall South, 800 West Campus Drive, Blacksburg, Virginia 24061, United States

E-mail: pcarlier@vt.edu

Phone: 540-231-9219 Fax: 540-231-3255

### Table of Contents

| Page |                                                                                                                                                                                              |
|------|----------------------------------------------------------------------------------------------------------------------------------------------------------------------------------------------|
| S2   | <b>Table S1-2.</b> $^{13}\text{C}$ NMR chemical shifts ( $\text{CDCl}_3$ , C1, C3, C=O, C1') for <b>7a-ae</b> and <b>8a-ae</b> .                                                             |
| S4   | <b>Table S3.</b> $^1\text{H}$ NMR chemical shifts ( $\text{CDCl}_3$ ) of H3, H4 $\alpha$ , and H4 $\beta$ for <b>7a-ae</b> and <b>8a-ae</b> .                                                |
| S5   | <b>Table S4.</b> $J_{\text{HH}}$ [Hz] values ( $\text{CDCl}_3$ ) for H1, H3, H4 $\alpha$ , and H4 $\beta$ for <b>7a-ae</b> and <b>8a-ae</b> .                                                |
| S6   | <b>Figures S1-S3.</b> Full $^1\text{H}$ and $^{13}\text{C}$ NMR (bold) assignment of structures <b>7a</b> and <b>8a</b> , <b>7b</b> and <b>8b</b> , <b>7ab</b> and <b>8ab</b> .              |
| S8   | <b>Figures S4-5:</b> NOE spectra of <b>8a</b> and <b>7a</b> .                                                                                                                                |
| S9   | <b>Table S5.</b> Observed NOE correlations in <b>7a</b> and <b>8a</b> .                                                                                                                      |
| S10  | <b>Figures S6-S7.</b> Representative low energy structures of <b>7a</b> & <b>8a</b> , <b>7b</b> & <b>8b</b> .                                                                                |
| S12  | <b>Tables S6-13.</b> Calculated energies, free energies and Boltzmann distributions of conformers of <b>7a</b> , <b>8a</b> , <b>7b</b> , <b>8b</b>                                           |
| S20  | <b>Table S14.</b> Boltzmann distribution of conformer ensembles of <b>7a</b> , <b>8a</b> , <b>7b</b> , <b>8b</b> .                                                                           |
| S21  | <b>Table S15.</b> Calculated $^1\text{H}$ - $^1\text{H}$ coupling constants for all conformers of <b>7a</b> , <b>8a</b> , <b>7b</b> , <b>8b</b>                                              |
| S22  | <b>Table S16.</b> Calculated Boltzmann weighted average and experimental $^1\text{H}$ - $^1\text{H}$ coupling constants for <b>7a</b> , <b>8a</b> , <b>7b</b> , <b>8b</b> , and RMSD values. |
| S23  | <b>Tables S17-20.</b> Calculated Boltzmann weighted average and experimental $^{13}\text{C}$ NMR chemical shifts of <b>7a</b> , <b>7b</b> , <b>8a</b> , and <b>8b</b> .                      |
| S27  | <b>Tables S21-22.</b> Predicted $^{13}\text{C}$ NMR shifts in C1 and C3 for calculated conformers of compounds <b>7a</b> & <b>7b</b> , grouped according to conformer ensembles B and C.     |
| S29  | $^1\text{H}$ and $^{13}\text{C}$ NMR spectra of <b>7aa</b> , <b>8aa</b> , <b>7ab</b> , <b>8ab</b> , <b>7ac</b> , <b>8ac</b> , <b>7ad</b> , <b>8ad</b> , <b>7ae</b> , <b>8ae</b> .            |
| S44  | B3LYP/6-31G(d) Cartesian coordinates for all conformers of <b>7a</b> , <b>8a</b> , <b>7b</b> , <b>8b</b> .                                                                                   |

**Table S1.** <sup>13</sup>C NMR chemical shifts (CDCl<sub>3</sub>) of C-1 and C-3 for **7a-ae** and **8a-ae**.

|                                                               | C-3 [ppm]          |                    |                  | C-1 [ppm]         |                    |                  |
|---------------------------------------------------------------|--------------------|--------------------|------------------|-------------------|--------------------|------------------|
|                                                               | 7                  | 8                  | Δ <sub>7-8</sub> | 7                 | 8                  | Δ <sub>7-8</sub> |
| <b>a</b> 2',4'-Cl <sub>2</sub>                                | 52.34 <sup>c</sup> | 56.7 <sup>b</sup>  | -4.3             | 51.3 <sup>b</sup> | 53.9 <sup>b</sup>  | -2.6             |
| <b>b</b> H                                                    | 52.7 <sup>b</sup>  | 57.0 <sup>b</sup>  | -4.3             | 55.1 <sup>b</sup> | 58.8 <sup>b</sup>  | -3.8             |
| <b>c</b> <sup>e</sup> 2'-Cl                                   | 52.23              | 56.8               | -4.58            | 51.8              | 54.4               | -2.6             |
| <b>d</b> <sup>e</sup> 4'-Cl                                   | 52.5               | 56.9               | -4.4             | 54.3              | 58.1               | -3.8             |
| <b>e</b> <sup>e,g</sup> 2'-Cl, 4'-Me                          | 52.0               | 56.7               | -4.7             | 51.4              | 53.9               | -2.5             |
| <b>f</b> <sup>e</sup> 2'-Me, 4'-Cl                            | 52.6               | 57.0               | -4.4             | 51.4              | 53.5               | -2.1             |
| <b>g</b> <sup>e</sup> 2',4'-F <sub>2</sub>                    | 52.4 <sup>b</sup>  | 56.8 <sup>b</sup>  | -4.4             | 47.8 <sup>b</sup> | 50.6 <sup>b</sup>  | -2.8             |
| <b>h</b> <sup>e</sup> 2'-F,4'-Cl                              | 52.6               | 56.8               | -4.3             | 47.9 <sup>a</sup> | 50.6 <sup>a</sup>  | -2.7             |
| <b>I</b> 2'-Cl,4'-F                                           | 52.30 <sup>c</sup> | 56.7 <sup>b</sup>  | -4.4             | 51.2 <sup>b</sup> | 53.8 <sup>b</sup>  | -2.6             |
| <b>j</b> <sup>e,g</sup> 2'-Cl,4'-Br                           | 52.2               | 56.6               | -4.4             | 51.2              | 53.9               | -2.7             |
| <b>k</b> 2'-Br,4'-Cl                                          | 52.36 <sup>c</sup> | 56.7 <sup>b</sup>  | -4.3             | 53.7 <sup>b</sup> | 56.6 <sup>b</sup>  | -2.9             |
| <b>l</b> 2',4'-Br <sub>2</sub>                                | 52.1 <sup>c</sup>  | 56.57 <sup>c</sup> | -4.5             | 53.7 <sup>b</sup> | 56.57 <sup>c</sup> | -2.8             |
| <b>m</b> 2'-I,4'-F                                            | 52.46 <sup>c</sup> | 56.8 <sup>b</sup>  | -4.3             | 58.0 <sup>b</sup> | 61.6 <sup>b</sup>  | -3.6             |
| <b>n</b> 2'-F,4'-I                                            | 52.5 <sup>c</sup>  | 56.8 <sup>b</sup>  | -4.3             | 48.0 <sup>b</sup> | 50.7 <sup>b</sup>  | -2.7             |
| <b>o</b> 2'-Br,4'-I                                           | 52.36 <sup>c</sup> | 56.7 <sup>b</sup>  | -4.3             | 53.9 <sup>b</sup> | 56.8 <sup>b</sup>  | -2.9             |
| <b>p</b> 2'-Cl,4'-OMe                                         | 52.2 <sup>c</sup>  | 56.9 <sup>b</sup>  | -4.7             | 51.3 <sup>b</sup> | 53.9 <sup>b</sup>  | -2.6             |
| <b>q</b> 2'-OMe,4'-Cl                                         | 52.29 <sup>c</sup> | 57.0 <sup>b</sup>  | -4.7             | 48.8 <sup>b</sup> | 51.3 <sup>b</sup>  | -2.5             |
| <b>r</b> 2'-Cl,4'-CO <sub>2</sub> Me                          | 52.30 <sup>c</sup> | 56.7 <sup>b</sup>  | -4.4             | 51.6 <sup>b</sup> | 54.3 <sup>b</sup>  | -2.7             |
| <b>s</b> <sup>e,g</sup> 2',4'-(CF <sub>3</sub> ) <sub>2</sub> | 53.0               | 56.6               | -3.6             | 49.8              | 53.4               | -3.6             |
| <b>t</b> <sup>e,g</sup> 2',4'-Me <sub>2</sub>                 | 52.4               | 57.0               | -4.6             | 51.4              | 53.5               | -2.1             |
| <b>u</b> <sup>e</sup> 2',4'-(OMe) <sub>2</sub>                | 51.9               | 57.0               | -5.1             | 49.0              | 51.5               | -2.5             |
| <b>v</b> 3',4'-Cl <sub>2</sub>                                | 52.5 <sup>c</sup>  | 56.8 <sup>b</sup>  | -4.3             | 53.9 <sup>b</sup> | 57.9 <sup>b</sup>  | -4.0             |
| <b>w</b> <sup>e</sup> 3',4'-(OMe) <sub>2</sub>                | 53.0               | 57.1               | -4.1             | 54.8              | 58.7               | -3.9             |
| <b>x</b> 2',6'-F <sub>2</sub> ,4'-Cl                          | 53.9 <sup>b</sup>  | 57.3 <sup>b</sup>  | -3.4             | 44.6 <sup>b</sup> | 48.0 <sup>b</sup>  | -3.4             |
| <b>y</b> 2',3',4'-F <sub>3</sub>                              | 52.39 <sup>c</sup> | 56.7 <sup>b</sup>  | -4.3             | 47.9 <sup>b</sup> | 50.5 <sup>b</sup>  | -2.6             |
| <b>z</b> <sup>e,g</sup> 2'-Br,4'-F,5'-OMe                     | 53.1               | 56.7               | -3.6             | 53.5              | 56.4               | -2.9             |
| <b>aa</b> Bu                                                  | 52.7               | 56.6               | -3.9             | 50.4              | 52.9               | -2.5             |
| <b>ab</b> Cy                                                  | 53.5               | 56.6               | -3.1             | 55.4              | 57.8               | -2.4             |
| <b>ac</b> CHEt <sub>2</sub>                                   | 54.1               | 56.6               | -2.5             | 51.0              | 54.6               | -3.6             |
| <b>ad</b> <i>t</i> -Bu                                        | 54.4               | 56.5               | -2.1             | 59.4              | 62.6               | -3.2             |
| <b>ae</b> <i>i</i> -Bu                                        | 52.5               | 56.6               | -4.1             | 48.2              | 50.7               | -2.5             |
| <b>Average</b>                                                | 52.6               | 56.8               | -4.1             | 51.7              | 54.6               | -2.9             |
| <b>St. deviation</b>                                          | 0.6                | 0.2                | 0.6              | 3.2               | 3.4                | 0.5              |

Signals identified via: <sup>a</sup>JCF, <sup>b</sup>HSQC, <sup>c</sup>(C)DEPT and HSQC, <sup>d</sup>HMBC and HSQC. <sup>e</sup>Sample is unavailable. <sup>g</sup>Sample and NMR data unavailable. <sup>h</sup>If the values are identical, only one of them is shown. <sup>e,g</sup>Shifts were assigned based on the pattern seen in proven compounds, unless stated otherwise.

**Table S2.**  $^{13}\text{C}$  NMR chemical shifts ( $\text{CDCl}_3$ ) of C=O and C-1' for **7a-ae** and **8a-ae**.

|                                                               | C=O [ppm] |       |                | C-1' [ppm] |       |                |
|---------------------------------------------------------------|-----------|-------|----------------|------------|-------|----------------|
|                                                               | 7         | 8     | $\Delta_{7-8}$ | 7          | 8     | $\Delta_{7-8}$ |
| <b>a</b> <sup>a</sup> 2',4'-Cl <sub>2</sub>                   | 173.8     | 173.1 | 0.8            | 137.9      | 137.4 | 0.5            |
| <b>b</b> <sup>a</sup> H                                       | 174.3     | 173.3 | 1.0            | 142.1      | 140.8 | 1.3            |
| <b>c</b> <sup>d</sup> 2'-Cl                                   | 173.9     | 173.2 | 0.7            | –          | –     | –              |
| <b>d</b> <sup>d</sup> 4'-Cl                                   | 174.1     | 173.2 | 0.9            | –          | –     | –              |
| <b>e</b> <sup>d,e</sup> 2'-Cl, 4'-Me                          | 173.7     | 173.1 | 0.6            | –          | –     | –              |
| <b>f</b> <sup>d</sup> 2'-Me, 4'-Cl                            | 174.3     | 173.3 | 1.0            | –          | –     | –              |
| <b>g</b> <sup>b,d</sup> 2',4'-F <sub>2</sub>                  | 173.9     | 173.2 | 0.7            | 125.2      | 124.0 | 1.2            |
| <b>h</b> <sup>c,d</sup> 2'-F,4'-Cl                            | 173.9     | 173.1 | 0.8            | 128.0      | 126.7 | 1.3            |
| <b>i</b> <sup>a,b</sup> 2'-Cl,4'-F                            | 173.4     | 173.1 | 0.3            | 135.3      | 134.7 | 0.6            |
| <b>j</b> <sup>d,e</sup> 2'-Cl,4'-Br                           | 173.7     | 172.9 | 0.8            | –          | –     | –              |
| <b>k</b> <sup>a</sup> 2'-Br,4'-Cl                             | 173.8     | 173.1 | 0.8            | 139.5      | 139.2 | 0.3            |
| <b>l</b> <sup>a</sup> 2',4'-Br <sub>2</sub>                   | 173.7     | 173.0 | 0.7            | 139.9      | 139.5 | 0.4            |
| <b>m</b> <sup>a,b</sup> 2'-I,4'-F                             | 173.9     | 173.1 | 0.8            | 139.8      | 139.5 | 0.3            |
| <b>n</b> <sup>b</sup> 2'-F,4'-I                               | 173.9     | 173.1 | 0.8            | 129.2      | 128.0 | 1.2            |
| <b>o</b> <sup>a</sup> 2'-Br,4'-I                              | 173.8     | 173.0 | 0.8            | 140.7      | 140.4 | 0.3            |
| <b>p</b> <sup>a</sup> 2'-Cl,4'-OMe                            | 173.9     | 173.2 | 0.7            | 131.2      | 130.5 | 0.7            |
| <b>q</b> <sup>a</sup> 2'-OMe,4'-Cl                            | 174.1     | 173.4 | 0.7            | 128.8      | 127.9 | 0.9            |
| <b>r</b> <sup>a</sup> 2'-Cl,4'-CO <sub>2</sub> Me             | 173.8     | 173.1 | 0.7            | 144.1      | 143.7 | 0.4            |
| <b>s</b> <sup>d,e</sup> 2',4'-(CF <sub>3</sub> ) <sub>2</sub> | 173.8     | 172.8 | 1.0            | –          | –     | –              |
| <b>t</b> <sup>d,e</sup> 2',4'-Me <sub>2</sub>                 | 174.2     | 173.3 | 0.9            | –          | –     | –              |
| <b>u</b> <sup>d</sup> 2',4'-(OMe) <sub>2</sub>                | 174.0     | 173.5 | 0.5            | –          | –     | –              |
| <b>v</b> <sup>a</sup> 3',4'-Cl <sub>2</sub>                   | 174.1     | 173.1 | 1.0            | 142.4      | 141.2 | 1.2            |
| <b>w</b> <sup>d</sup> 3',4'-(OMe) <sub>2</sub>                | 174.4     | 173.3 | 1.1            | –          | –     | –              |
| <b>x</b> <sup>b</sup> 2',6'-F <sub>2</sub> ,4'-Cl             | 174.1     | 173.2 | 1.0            | 116.7      | 114.8 | 1.9            |
| <b>y</b> <sup>b</sup> 2',3',4'-F <sub>3</sub>                 | 173.8     | 173.1 | 0.7            | 126.7      | 125.6 | 1.1            |
| <b>z</b> <sup>d,e</sup> 2'-Br,4'-F,5'-OMe                     | 173.9     | 172.9 | 1.0            | –          | –     | –              |
| <b>aa</b> <sup>a</sup> Bu                                     | 174.4     | 173.9 | 0.5            | 35.5       | 34.7  | 0.8            |
| <b>ab</b> <sup>b</sup> Cy                                     | 174.7     | 174.0 | 0.7            | 43.3       | 42.5  | 0.8            |
| <b>ac</b> <sup>b</sup> CHEt <sub>2</sub>                      | 174.7     | 174.1 | 0.6            | 46.7       | 46.1  | 0.6            |
| <b>ad</b> <sup>a</sup> <i>t</i> -Bu                           | 175.1     | 174.0 | 1.1            | 36.8       | 35.7  | 1.1            |
| <b>ae</b> <sup>b</sup> <i>i</i> -Bu                           | 174.4     | 173.9 | 0.5            | 44.5       | 44.5  | 0.0            |
| <b>Average</b>                                                | 174.0     | 173.3 | 0.8            | –          | –     | –              |
| <b>St. deviation</b>                                          | 0.4       | 0.3   | 0.2            | –          | –     | –              |
| <b>Average a-z</b>                                            | 173.9     | 173.1 | 0.8            | 134.2      | 133.4 | 0.9            |
| <b>St. deviation a-z</b>                                      | 0.2       | 0.2   | 0.2            | 7.8        | 8.2   | 0.5            |
| <b>Average aa-ae</b>                                          | 174.7     | 174.0 | 0.7            | 41.4       | 40.7  | 0.7            |
| <b>St. deviation aa-ae</b>                                    | 0.3       | 0.1   | 0.2            | 4.9        | 5.2   | 0.4            |

Carbonyl shifts assigned based on a characteristic  $\delta$  [ppm] since both are isolated in their area. C1' signals identified via: <sup>a</sup>HMBC, <sup>b</sup>HSQC and  $J_{\text{CF}}$ , <sup>c</sup> $J_{\text{CF}}$ . <sup>d</sup>Archival sample was unavailable. <sup>e</sup> Sample and 2D NMR data unavailable.

**Table S3.** <sup>1</sup>H NMR chemical shifts (CDCl<sub>3</sub>) of H-3, H-4 $\alpha$ , and H-4 $\beta$  for **7a-ae** and **8a-ae**.

|                            |                                       | $\delta$ H-3 [ppm] |      |                | $\delta$ H-4 $\alpha$ [ppm] |      |                | $\delta$ H-4 $\beta$ [ppm] |      |                |
|----------------------------|---------------------------------------|--------------------|------|----------------|-----------------------------|------|----------------|----------------------------|------|----------------|
|                            |                                       | 7                  | 8    | $\Delta_{7-8}$ | 7                           | 8    | $\Delta_{7-8}$ | 7                          | 8    | $\Delta_{7-8}$ |
| <b>a</b>                   | 2',4'-Cl <sub>2</sub>                 | 3.84               | 3.99 | -0.15          | 3.26                        | 3.25 | 0.01           | 3.10                       | 3.02 | 0.08           |
| <b>b</b>                   | H                                     | 3.98               | 3.99 | -0.01          | 3.28                        | 3.24 | 0.04           | 3.14                       | 3.02 | 0.12           |
| <b>c</b>                   | 2'-Cl                                 | 3.86               | 4.00 | -0.14          | 3.27                        | 3.25 | 0.02           | 3.09                       | 3.04 | 0.05           |
| <b>d</b>                   | 4'-Cl                                 | 3.91               | 3.95 | -0.04          | 3.26                        | 3.24 | 0.02           | 3.11                       | 3.01 | 0.10           |
| <b>e</b>                   | 2'-Cl, 4'-Me                          | 3.81               | 3.96 | -0.15          | 3.22                        | 3.21 | 0.01           | 3.04                       | 3.00 | 0.04           |
| <b>f</b>                   | 2'-Me, 4'-Cl                          | 3.89               | 3.96 | -0.07          | 3.25                        | 3.24 | 0.01           | 3.11                       | 2.99 | 0.12           |
| <b>g</b>                   | 2',4'-F <sub>2</sub>                  | 3.89               | 3.97 | -0.08          | 3.24                        | 3.24 | 0.00           | 3.07                       | 3.01 | 0.06           |
| <b>h</b>                   | 2'-F,4'-Cl                            | 3.90               | 3.98 | -0.08          | 3.25                        | 3.23 | 0.02           | 3.08                       | 3.00 | 0.08           |
| <b>i</b>                   | 2'-Cl,4'-F                            | 3.85               | 4.00 | -0.15          | 3.26                        | 3.24 | 0.02           | 3.09                       | 3.02 | 0.07           |
| <b>j</b>                   | 2'-Cl,4'-Br                           | 3.84               | 3.99 | -0.15          | 3.26                        | 3.24 | 0.02           | 3.10                       | 3.01 | 0.09           |
| <b>k</b>                   | 2'-Br,4'-Cl                           | 3.85               | 4.00 | -0.15          | 3.26                        | 3.24 | 0.02           | 3.10                       | 3.02 | 0.08           |
| <b>l</b>                   | 2',4'-Br <sub>2</sub>                 | 3.82               | 3.98 | -0.16          | 3.25                        | 3.25 | 0.00           | 3.08                       | 3.03 | 0.05           |
| <b>m</b>                   | 2'-I,4'-F                             | 3.88               | 4.01 | -0.13          | 3.26                        | 3.24 | 0.02           | 3.12                       | 3.02 | 0.10           |
| <b>n</b>                   | 2'-F,4'-I                             | 3.89               | 3.97 | -0.08          | 3.24                        | 3.23 | 0.01           | 3.08                       | 2.99 | 0.09           |
| <b>o</b>                   | 2'-Br,4'-I                            | 3.85               | 3.99 | -0.14          | 3.25                        | 3.24 | 0.01           | 3.10                       | 3.01 | 0.09           |
| <b>p</b>                   | 2'-Cl,4'-OMe                          | 3.85               | 4.00 | -0.15          | 3.25                        | 3.23 | 0.02           | 3.08                       | 3.01 | 0.07           |
| <b>q</b>                   | 2'-OMe,4'-Cl                          | 3.82               | 3.97 | -0.15          | 3.22                        | 3.21 | 0.01           | 3.03                       | 2.98 | 0.05           |
| <b>r</b>                   | 2'-Cl,4'-CO <sub>2</sub> Me           | 3.85               | 4.01 | -0.16          | 3.27                        | 3.25 | 0.02           | 3.10                       | 3.03 | 0.07           |
| <b>s</b>                   | 2',4'-(CF <sub>3</sub> ) <sub>2</sub> | 4.00               | 4.02 | -0.02          | 3.30                        | 3.30 | 0.00           | 3.23                       | 3.09 | 0.14           |
| <b>t</b>                   | 2',4'-Me <sub>2</sub>                 | 3.90               | 3.93 | -0.03          | 3.22                        | 3.20 | 0.02           | 3.08                       | 2.97 | 0.11           |
| <b>u</b>                   | 2',4'-(OMe) <sub>2</sub>              | 3.80               | 3.96 | -0.16          | 3.21                        | 3.21 | 0.00           | 3.14                       | 3.00 | 0.14           |
| <b>v</b>                   | 3',4'-Cl <sub>2</sub>                 | 3.94               | 3.95 | -0.01          | 3.27                        | 3.23 | 0.04           | 3.14                       | 3.00 | 0.14           |
| <b>w</b>                   | 3',4'-(OMe) <sub>2</sub>              | 4.00               | 3.96 | 0.04           | 3.27                        | 3.23 | 0.04           | 3.15                       | 3.02 | 0.13           |
| <b>x</b>                   | 2',6'-F <sub>2</sub> ,4'-Cl           | 4.12               | 3.97 | 0.15           | 3.28                        | 3.23 | 0.05           | 3.15                       | 2.97 | 0.18           |
| <b>y</b>                   | 2',3',4'-F <sub>3</sub>               | 3.89               | 3.97 | -0.08          | 3.24                        | 3.24 | 0.00           | 3.06                       | 3.00 | 0.06           |
| <b>z</b>                   | 2'-Br,4'-F,5'-OMe                     | 3.99               | 4.00 | -0.01          | 3.29                        | 3.24 | 0.05           | 3.20                       | 3.03 | 0.17           |
| <b>aa</b>                  | Bu                                    | 3.99               | 3.80 | 0.19           | 3.12                        | 3.13 | -0.01          | 2.99                       | 2.82 | 0.17           |
| <b>ab</b>                  | Cy                                    | 4.02               | 3.74 | 0.28           | 3.10                        | 3.11 | -0.01          | 3.00                       | 2.78 | 0.22           |
| <b>ac</b>                  | CHEt <sub>2</sub>                     | 4.05               | 3.74 | 0.31           | 3.12                        | 3.12 | 0.00           | 3.12                       | 2.78 | 0.34           |
| <b>ad</b>                  | <i>t</i> -Bu                          | 4.09               | 3.68 | 0.41           | 3.11                        | 3.14 | -0.03          | 3.08                       | 2.77 | 0.31           |
| <b>ae</b>                  | <i>i</i> -Bu                          | 3.99               | 3.80 | 0.19           | 3.13                        | 3.14 | -0.01          | 3.00                       | 2.83 | 0.17           |
| <b>Average</b>             |                                       | 3.91               | 3.94 | -0.03          | 3.23                        | 3.22 | 0.01           | 3.10                       | 2.98 | 0.12           |
| <b>St. deviation</b>       |                                       | 0.09               | 0.09 | 0.16           | 0.06                        | 0.04 | 0.02           | 0.05                       | 0.08 | 0.07           |
| <b>Average a-z</b>         |                                       | 3.89               | 3.98 | -0.09          | 3.26                        | 3.24 | 0.02           | 3.11                       | 3.01 | 0.10           |
| <b>St. deviation a-z</b>   |                                       | 0.07               | 0.02 | 0.08           | 0.02                        | 0.02 | 0.01           | 0.04                       | 0.02 | 0.04           |
| <b>Average aa-ae</b>       |                                       | 4.03               | 3.75 | 0.28           | 3.12                        | 3.13 | -0.01          | 3.04                       | 2.80 | 0.24           |
| <b>St. deviation aa-ae</b> |                                       | 0.04               | 0.05 | 0.09           | 0.01                        | 0.01 | 0.01           | 0.06                       | 0.03 | 0.08           |

**Table S4.**  $J_{\text{HH}}$  [Hz] values ( $\text{CDCl}_3$ ) for H-3, H-4 $\alpha$ , and H-4 $\beta$  for **7a-ae** and **8a-ae**.

|                            |                                       | <b>7</b>               | <b>8</b>               | <b>7</b>          | <b>8</b>          | <b>7</b>         | <b>8</b>         | <b>7</b>          | <b>8</b>          | <b>7</b>         | <b>8</b>         |
|----------------------------|---------------------------------------|------------------------|------------------------|-------------------|-------------------|------------------|------------------|-------------------|-------------------|------------------|------------------|
|                            |                                       | $^2J_{4\alpha-4\beta}$ | $^2J_{4\alpha-4\beta}$ | $^3J_{4\alpha-3}$ | $^3J_{4\alpha-3}$ | $^3J_{4\beta-3}$ | $^3J_{4\beta-3}$ | $^5J_{4\alpha-1}$ | $^5J_{4\alpha-1}$ | $^5J_{4\beta-1}$ | $^5J_{4\beta-1}$ |
| <b>a</b>                   | 2',4'-Cl <sub>2</sub>                 | 15.4                   | 15.1                   | 5.0               | 4.1               | 7.8              | 11.0             | 1.2               | 1.9               | 1.5              | 2.5              |
| <b>b</b>                   | H                                     | 15.4                   | 15.2                   | 5.4               | 4.3               | 6.8              | 11.2             | 1.4               | 1.9               | 1.6              | 2.6              |
| <b>c</b>                   | 2'-Cl                                 | 15.3                   | 15.1                   | 4.9               | 4.1               | 8.1              | 11.0             | 1.1               | 1.8               | 1.5              | 2.5              |
| <b>d</b>                   | 4'-Cl                                 | 15.5                   | 15.2                   | 5.4               | 4.2               | 7.0              | 11.2             | 1.3               | 1.9               | 1.6              | 2.6              |
| <b>e</b>                   | 2'-Cl, 4'-Me                          | 15.0                   | 15.0                   | 5.0               | 4.0               | 8.0              | 11.0             | 1.0               | 2.0               | 1.5              | 2.5              |
| <b>f</b>                   | 2'-Me, 4'-Cl                          | 15.4                   | 15.1                   | 5.3               | 4.2               | 7.0              | 11.1             | 1.3               | 1.9               | 1.6              | 2.6              |
| <b>g</b>                   | 2',4'-F <sub>2</sub>                  | 15.4                   | 15.1                   | 5.0               | 4.2               | 7.9              | 11.1             | 1.1               | 1.8               | 1.5              | 2.5              |
| <b>h</b>                   | 2'-F,4'-Cl                            | 15.4                   | 15.1                   | 5.1               | 4.2               | 7.7              | 11.1             | 1.1               | 1.9               | 1.4              | 2.5              |
| <b>i</b>                   | 2'-Cl,4'-F                            | 15.4                   | 15.1                   | 5.0               | 4.1               | 7.8              | 11.0             | 1.2               | 1.8               | 1.5              | 2.5              |
| <b>j</b>                   | 2'-Cl,4'-Br                           | 15.4                   | 15.1                   | 5.0               | 4.1               | 7.7              | 11.0             | 1.2               | 1.9               | 1.6              | 2.5              |
| <b>k</b>                   | 2'-Br,4'-Cl                           | 15.4                   | 15.1                   | 5.0               | 4.1               | 7.6              | 11.0             | 1.2               | 1.8               | 1.5              | 2.5              |
| <b>l</b>                   | 2',4'-Br <sub>2</sub>                 | 15.4                   | 15.1                   | 4.9               | 4.1               | 8.0              | 11.0             | 1.1               | 1.9               | 1.5              | 2.5              |
| <b>m</b>                   | 2'-I,4'-F                             | 15.4                   | 15.1                   | 5.2               | 4.1               | 7.1              | 11.1             | 1.3               | 1.8               | 1.6              | 2.5              |
| <b>n</b>                   | 2'-F,4'-I                             | 15.4                   | 15.1                   | 5.1               | 4.2               | 7.8              | 11.1             | 1.1               | 1.9               | 1.6              | 2.5              |
| <b>o</b>                   | 2'-Br,4'-I                            | 15.3                   | 15.1                   | 5.1               | 4.1               | 7.6              | 11.0             | 1.2               | 1.8               | 1.5              | 2.5              |
| <b>p</b>                   | 2'-Cl,4'-OMe                          | 15.3                   | 15.1                   | 4.9               | 4.2               | 8.1              | 11.0             | 1.1               | 1.9               | 1.5              | 2.6              |
| <b>q</b>                   | 2'-OMe,4'-Cl                          | 15.2                   | 15.1                   | 4.8               | 4.2               | 8.7              | 11.0             | 0.9               | 1.9               | 1.5              | 2.6              |
| <b>r</b>                   | 2'-Cl,4'-CO <sub>2</sub> Me           | 15.4                   | 15.1                   | 5.0               | 4.1               | 7.8              | 11.0             | 1.2               | 1.8               | 1.5              | 2.5              |
| <b>s<sup>a</sup></b>       | 2',4'-(CF <sub>3</sub> ) <sub>2</sub> | 15.5                   | 15.1                   | 5.5               | 4.0               | 5.5              | 11.1             | 1.5               | 1.8               | 1.5              | 2.4              |
| <b>t</b>                   | 2',4'-Me <sub>2</sub>                 | 15.0                   | 15.0                   | 5.0               | 4.0               | 7.0              | 11.0             | 1.5               | 1.5               | 1.5              | 2.0              |
| <b>u</b>                   | 2',4'-(OMe) <sub>2</sub>              | 15.2                   | 15.0                   | 4.7               | 4.2               | 9.4              | 11.0             | 0.8               | 1.9               | 1.3              | 2.6              |
| <b>v<sup>b</sup></b>       | 3',4'-Cl <sub>2</sub>                 | 15.5                   | 15.1                   | 5.5               | 4.1               | 6.4              | 11.2             | 1.4               | 1.8               | 1.6              | 2.5              |
| <b>w<sup>b</sup></b>       | 3',4'-(OMe) <sub>2</sub>              | 15.5                   | 15.1                   | 5.6               | 4.3               | 6.3              | 11.2             | 1.5               | 1.9               | 1.6              | 2.6              |
| <b>x<sup>b</sup></b>       | 2',6'-F <sub>2</sub> ,4'-Cl           | 15.4                   | 15.3                   | 5.4               | 4.4               | 6.0              | 11.2             | 1.6               | 1.9               | 1.8              | 2.6              |
| <b>y</b>                   | 2',3',4'-F <sub>3</sub>               | 15.4                   | 15.2                   | 5.0               | 4.1               | 7.9              | 11.1             | 1.1               | 1.9               | 1.6              | 2.5              |
| <b>z<sup>b</sup></b>       | 2'-Br,4'-F,5'-OMe                     | 15.4                   | 15.0                   | 5.5               | 4.1               | 5.7              | 11.1             | 1.6               | 1.8               | 1.6              | 2.5              |
| <b>aa</b>                  | Bu                                    | 15.3                   | 15.1                   | 5.3               | 4.2               | 7.3              | 11.2             | 1.2               | 1.9               | 1.5              | 2.6              |
| <b>ab</b>                  | Cy                                    | 15.3                   | 14.9                   | 5.3               | 4.1               | 6.9              | 11.2             | 1.3               | 1.8               | 1.5              | 2.6              |
| <b>ac<sup>a</sup></b>      | CHEt <sub>2</sub>                     | –                      | 15.0                   | 5.4               | 4.1               | 5.4              | 11.2             | 1.7               | 1.9               | 1.7              | 2.6              |
| <b>ad<sup>b</sup></b>      | <i>t</i> -Bu                          | 15.0                   | 14.6                   | 5.1               | 3.6               | 5.3              | 11.2             | 1.5               | 1.5               | 1.6              | 2.4              |
| <b>ae</b>                  | <i>i</i> -Bu                          | 15.4                   | 15.0                   | 5.3               | 4.2               | 7.4              | 11.2             | 1.2               | 1.9               | 1.5              | 2.6              |
| <b>Average</b>             |                                       | 15.3                   | 15.1                   | 5.2               | 4.1               | 7.3              | 11.1             | 1.3               | 1.8               | 1.5              | 2.5              |
| <b>St. deviation</b>       |                                       | 0.1                    | 0.1                    | 0.2               | 0.1               | 1.0              | 0.1              | 0.2               | 0.1               | 0.1              | 0.1              |
| <b>Average a-z</b>         |                                       | 15.4                   | 15.1                   | 5.1               | 4.1               | 7.4              | 11.1             | 1.2               | 1.9               | 1.5              | 2.5              |
| <b>St. deviation a-z</b>   |                                       | 0.1                    | 0.1                    | 0.2               | 0.1               | 0.9              | 0.1              | 0.2               | 0.1               | 0.1              | 0.1              |
| <b>Average aa-ae</b>       |                                       | 15.3                   | 14.9                   | 5.3               | 4.0               | 6.5              | 11.2             | 1.4               | 1.8               | 1.6              | 2.6              |
| <b>St. deviation aa-ae</b> |                                       | 0.2                    | 0.2                    | 0.1               | 0.3               | 1.0              | 0.0              | 0.2               | 0.2               | 0.1              | 0.1              |

<sup>a</sup>H-3 signal in the *trans* diastereomer is a triplet, <sup>b</sup>H-3 signal in the *trans* diastereomer is an apparent triplet.

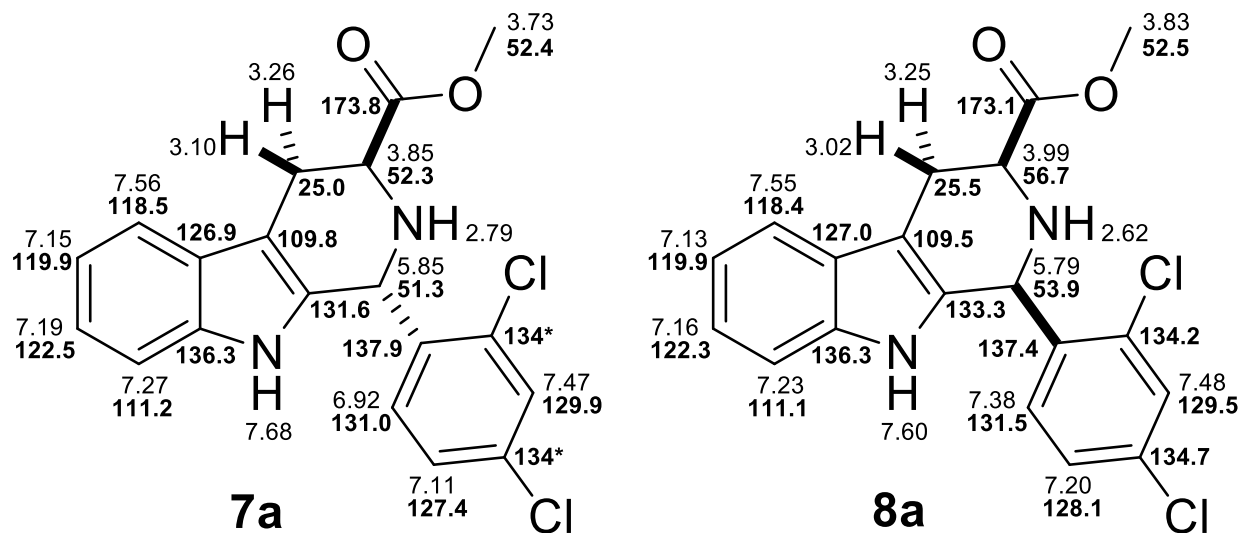

**Figure S1.** Full  $^1\text{H}$  and  $^{13}\text{C}$  NMR (bold) assignment of structures **7a** and **8a**. Signals marked \* are indistinguishable.

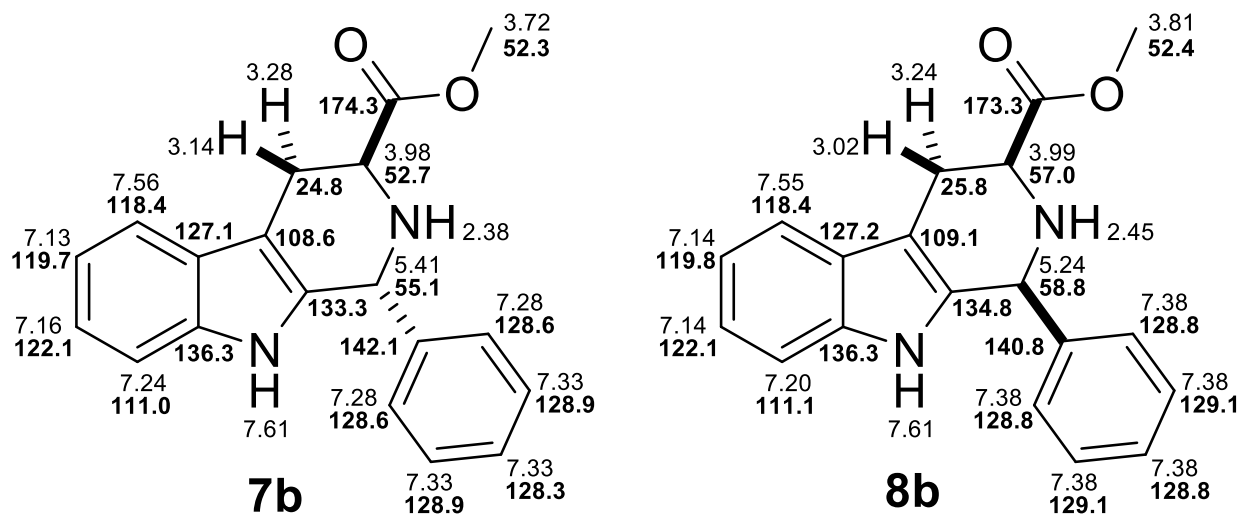

**Figure S2.** Full  $^1\text{H}$  and  $^{13}\text{C}$  NMR (bold) assignment of structures **7b** and **8b**.

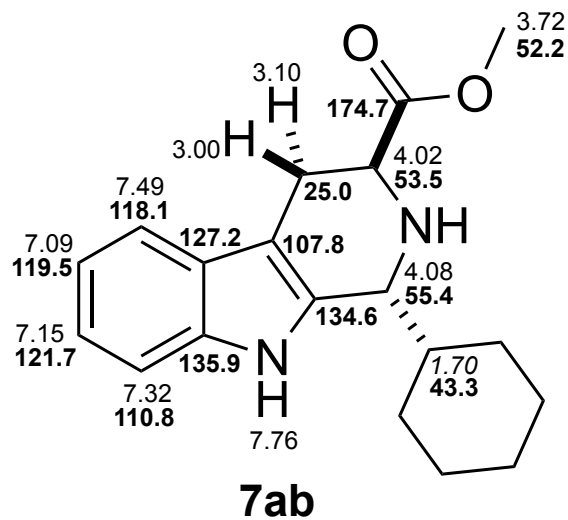

1.87-1.78 (m, 4H), 1.76-1.65 (m, 4H), 1.37-1.10 (m, 6H)  
30.4, 28.6, 26.7, 26.53, 26.48

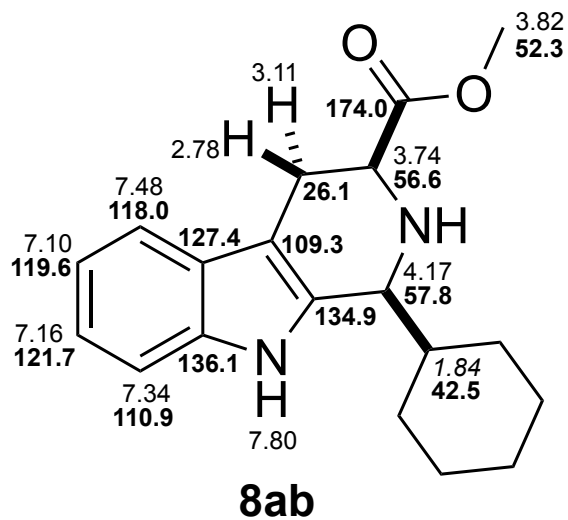

1.89-1.68 (m, 6H), 1.51-1.17 (m, 6H)  
29.9, 27.04, 26.97, 26.7, 26.5

**Figure S3.** Full  $^1\text{H}$  and  $^{13}\text{C}$  NMR (bold) assignment of **7ab** and **8ab**. Unassigned resonances corresponding to cyclohexyl ring are reported under the structures. The underlined unassigned  $^{13}\text{C}$  resonances show HMBC correlation to H-1.

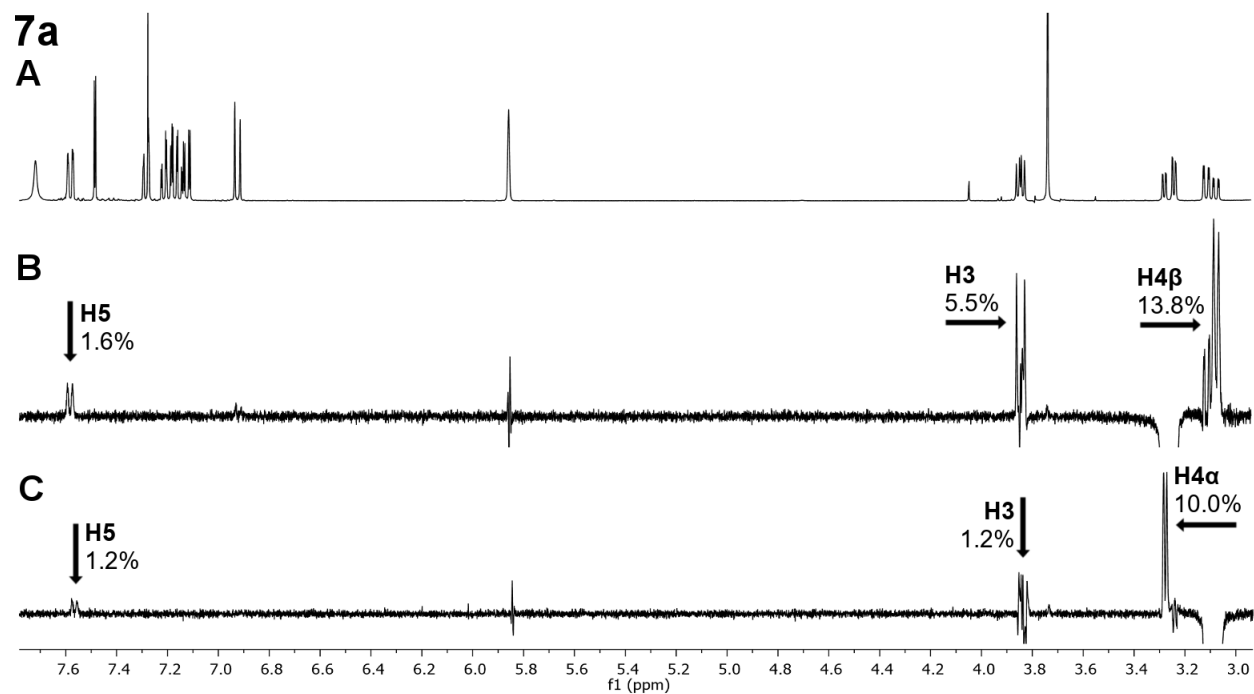

**Figure S4.** A)  $^1\text{H}$  NMR spectrum of **7a** ( $\text{CDCl}_3$ ); B) 1D NOE  $^1\text{H}$  NMR spectrum of **7a** resulting from irradiation of  $\text{H4}\alpha$ ; C) 1D NOE  $^1\text{H}$  NMR spectrum of **7a** resulting from irradiation of  $\text{H4}\beta$

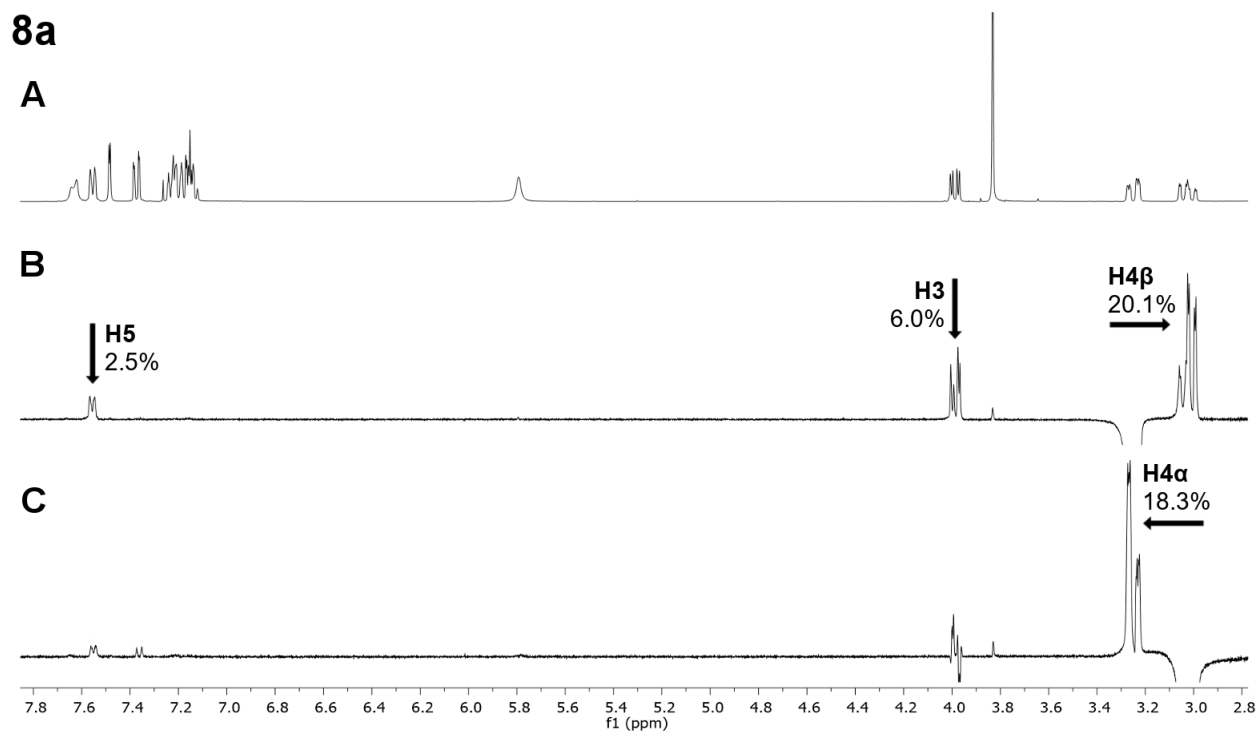

**Figure S5.** A)  $^1\text{H}$  NMR spectrum of **8a** ( $\text{CDCl}_3$ ); B) 1D NOE  $^1\text{H}$  NMR spectrum of **8a** resulting from irradiation of  $\text{H4}\alpha$ ; C) 1D NOE  $^1\text{H}$  NMR spectrum of **8a** resulting from irradiation of  $\text{H4}\beta$ .



**Table S5.** Selected 1D NOE correlations observed in **7a/8a** upon irradiation of H1, H3, H4 $\alpha$ , and H4 $\beta$ .

| Irradiated proton | Observed NOE in 7a [%] |     |             |            | Observed NOE in 8a [%] |     |             |            |
|-------------------|------------------------|-----|-------------|------------|------------------------|-----|-------------|------------|
|                   | H1                     | H3  | H4 $\alpha$ | H4 $\beta$ | H1                     | H3  | H4 $\alpha$ | H4 $\beta$ |
| H-1               | –                      | –   | –           | –          | –                      | 4.3 | –           | –          |
| H-3               | –                      | –   | 3.5         | –          | 3.4                    | –   | 3.0         | –          |
| H-4 $\alpha$      | –                      | 5.5 | –           | 13.8       | –                      | 6.0 | –           | 20.1       |
| H-4 $\beta$       | –                      | 1.2 | 10.0        | –          | –                      | –   | 18.3        | –          |

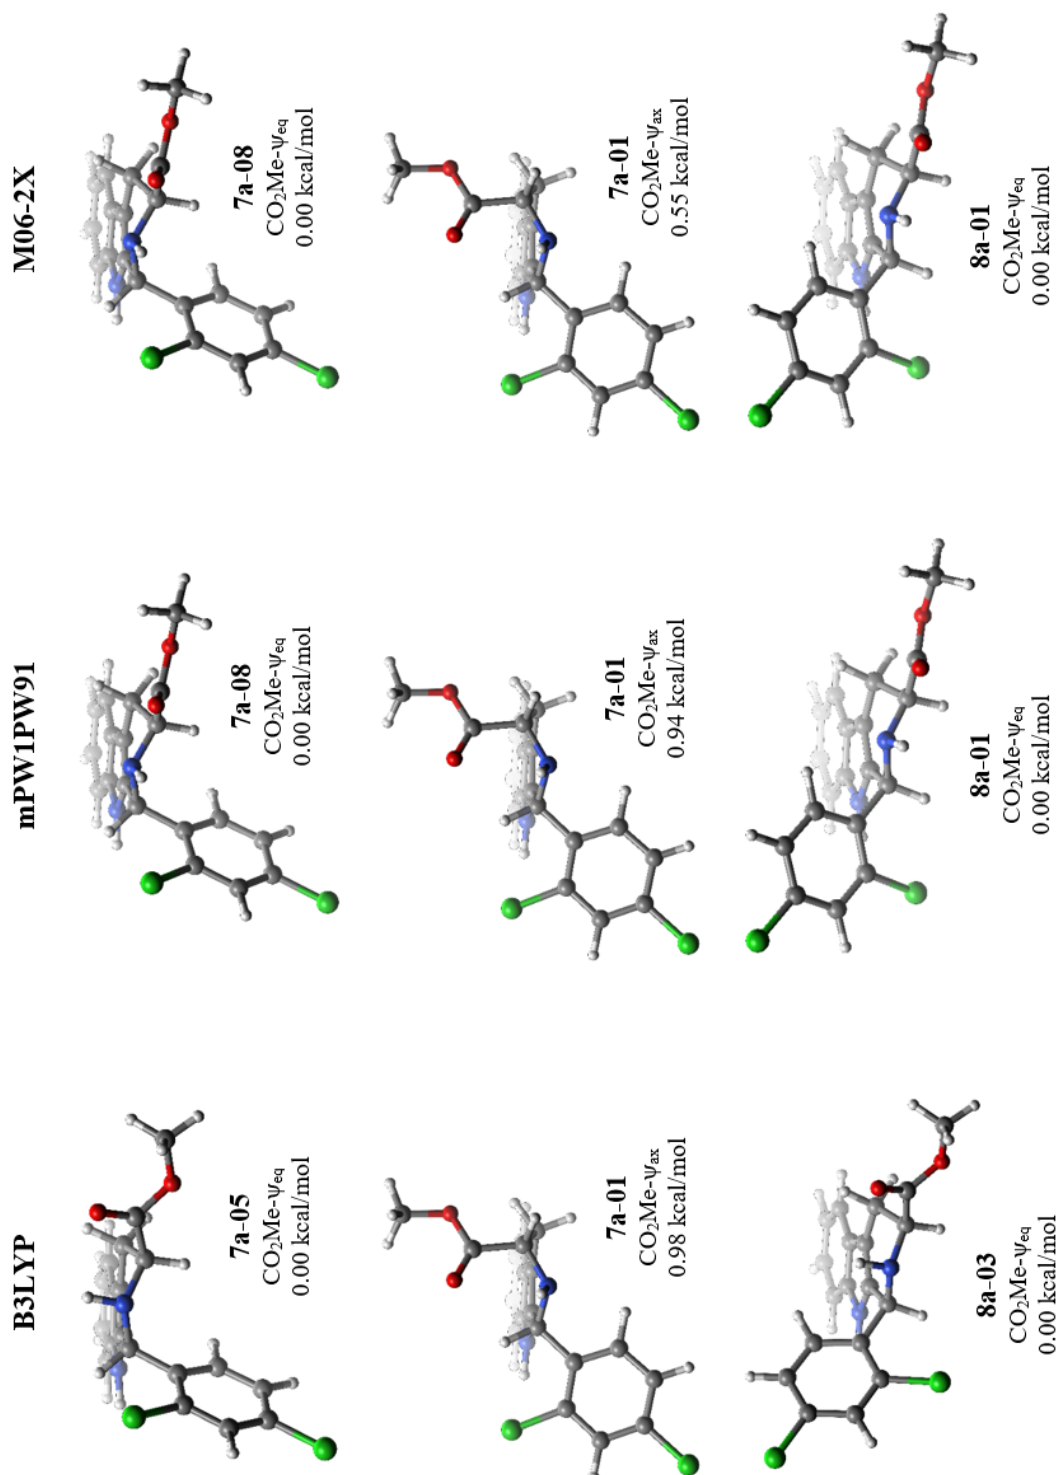

**Figure S6.** The lowest  $\Delta G$  (298 K)  $\psi_{\text{eq}}$ - and  $\psi_{\text{ax}}$ - conformers of **7a** and the global minimum of **8a**. Geometries were obtained by B3LYP/6-31G(d) optimization; free energies were calculated from single point energies using either the B3LYP/6-311+G(2d,p), mPW1PW91/6-311+G(2d,p), or M06-2X/def2-TZVP, all SCRF=(PCM,solvent=chloroform). Free energy correction was obtained from the B3LYP/6-31G(d) frequencies.

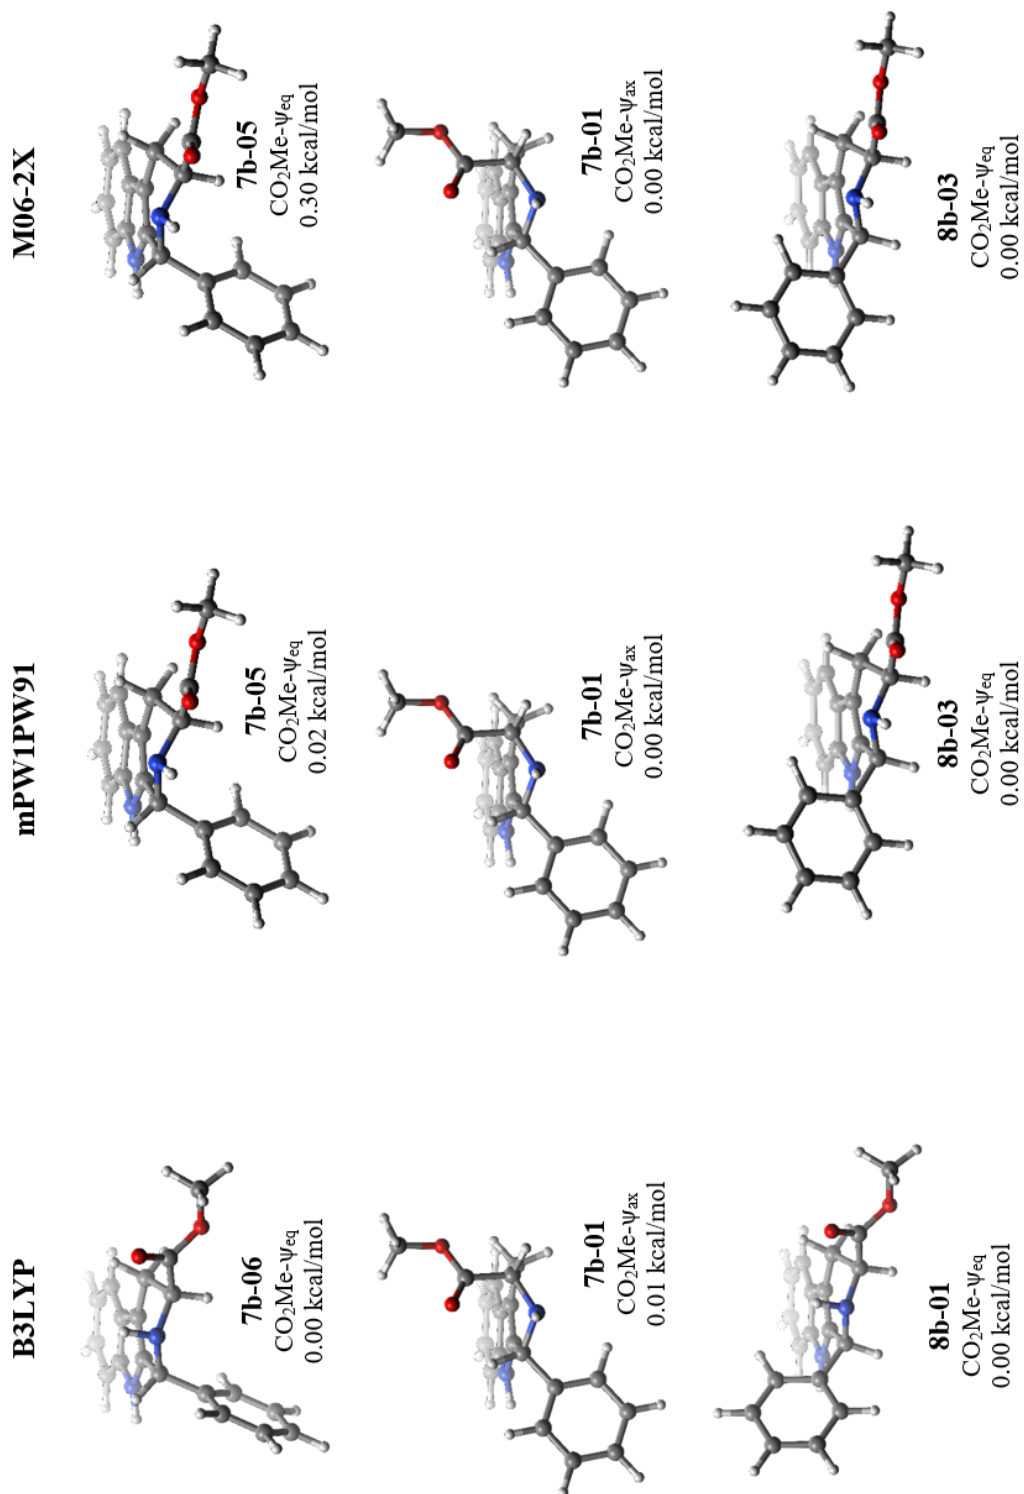

**Figure S7.** The lowest  $\Delta G$  (298 K)  $\psi_{eq}$ - and  $\psi_{ax}$ - conformers of **7b** and the global minimum of **8b**. Geometries were obtained by B3LYP/6-31G(d) optimization; free energies were calculated from single point energies using either the B3LYP/6-311+G(2d,p), mPW1PW91/6-311+G(2d,p), or M06-2X/def2-TZVP, all SCRF=(PCM,solvent=chloroform). Free energy correction was obtained from the B3LYP/6-31G(d) frequencies.

**Table S6.** Calculated energies of **7a** at MMFF94 and B3LYP/6-31G(d) levels of theory.

| Structural features |             |             |                         | MMFF94          | B3LYP/6-31G(d), vacuum |                |                             |                  | $\Delta G(298)$ |
|---------------------|-------------|-------------|-------------------------|-----------------|------------------------|----------------|-----------------------------|------------------|-----------------|
| CO <sub>2</sub> Me  | 2'-Cl       | H2          | H-bond (H2 to X)        | Energy [kJ/mol] | e0 [Hartree]           | ZPVE [Hartree] | G <sup>corr</sup> [Hartree] | G(298) [Hartree] | [kcal/mol]      |
| <b>7a-1</b>         | $\psi_{ax}$ | <i>exo</i>  | <i>eq</i>               | 237.34          | -1914.01436080         | 0.317204       | 0.264808                    | -1913.7495528    | 0.00            |
| <b>7a-2</b>         | $\psi_{ax}$ | <i>exo</i>  | <i>eq</i>               | 243.65          | -1914.01270533         | 0.317049       | 0.264372                    | -1913.74833333   | 1.04            |
| <b>7a-3</b>         | $\psi_{ax}$ | <i>endo</i> | <i>eq</i>               | 252.89          | -1914.00942053         | 0.316971       | 0.264333                    | -1913.74508753   | 3.10            |
| <b>7a-4</b>         | $\psi_{ax}$ | <i>endo</i> | <i>none<sup>b</sup></i> | 254.24          | -1914.00669434         | 0.317024       | 0.264215                    | -1913.74247934   | 4.81            |
| <b>7a-5</b>         | $\psi_{eq}$ | <i>exo</i>  | <i>ax</i>               | 254.63          | -1914.01118957         | 0.316725       | 0.263415                    | -1913.74777457   | 1.99            |
| <b>7a-6</b>         | $\psi_{eq}$ | <i>exo</i>  | <i>eq</i>               | 255.98          | -1914.01103429         | 0.316673       | 0.263891                    | -1913.74714329   | 2.09            |
| <b>7a-7</b>         | $\psi_{ax}$ | <i>exo</i>  | <i>ax</i>               | 256.20          | -1914.00796854         | 0.316920       | 0.263858                    | -1913.74411054   | 4.01            |
| <b>7a-8</b>         | $\psi_{eq}$ | <i>exo</i>  | <i>eq</i>               | 256.61          | -1914.01209044         | 0.316635       | 0.263982                    | -1913.74810844   | 1.42            |
| <b>7a-9</b>         | $\psi_{eq}$ | <i>exo</i>  | <i>ax</i>               | 257.95          | -1914.00962662         | 0.316815       | 0.263635                    | -1913.74599162   | 2.97            |
| <b>7a-10</b>        | $\psi_{ax}$ | <i>endo</i> | <i>ax</i>               | 260.51          | -1914.00459481         | 0.317006       | 0.264311                    | -1913.74028381   | 6.13            |
| <b>7a-11</b>        | $\psi_{ax}$ | <i>endo</i> | <i>eq</i>               | 262.72          | -1914.00718234         | 0.316897       | 0.264267                    | -1913.74291534   | 4.50            |
| <b>7a-12</b>        | $\psi_{ax}$ | <i>exo</i>  | <i>ax</i>               | 264.81          | -1914.00688677         | 0.316952       | 0.263775                    | -1913.74311177   | 4.69            |
| <b>7a-13</b>        | $\psi_{eq}$ | <i>endo</i> | <i>ax</i>               | 272.33          | -1914.00582376         | 0.316682       | 0.264074                    | -1913.74174976   | 5.36            |
| <b>7a-14</b>        | $\psi_{eq}$ | <i>endo</i> | <i>eq</i>               | 276.11          | -1914.00427431         | 0.316387       | 0.263246                    | -1913.74102831   | 6.33            |
| <b>7a-15</b>        | $\psi_{eq}$ | <i>endo</i> | <i>eq</i>               | 277.22          | -1914.00290824         | 0.316454       | 0.263129                    | -1913.73977924   | 7.19            |
| <b>7a-16</b>        | $\psi_{eq}$ | <i>endo</i> | <i>ax</i>               | 277.82          | -1914.00227563         | 0.316509       | 0.263098                    | -1913.73917763   | 7.58            |

<sup>a</sup> Calculated at 298 K. <sup>b</sup> C=O is oriented towards N2 but H-bond is not geometrically possible. <sup>c</sup> OCH<sub>3</sub> is oriented towards N2 but H-bond is not geometrically possible.

**Table S7.** Calculated energies of **7a** at B3LYP/6-311+G(2d,p)// B3LYP/6-31G(d) (**Method 1**), mPW1PW91/6-311+G(2d,p)// B3LYP/6-31G(d) (**Method 2**), and M06-2X/def2-TZVP//B3LYP/6-31G(d) (**Method 3**), all with SCRF=(PCM, solvent=chloroform).

|                            | Method 1               |                  | Method 2                   |                        | Method 3        |                            |                        |  |
|----------------------------|------------------------|------------------|----------------------------|------------------------|-----------------|----------------------------|------------------------|--|
|                            | $e_0$ [Hartree]        | G(298) [Hartree] | $e_0$ [Hartree]            | G(298) [Hartree]       | $e_0$ [Hartree] | G(298) [Hartree]           |                        |  |
| <b>7a-1</b>                | -1914.37029604         | -1914.10548804   | -1914.14966185             | -1913.88485385         | -1914.01318382  | -1913.74837582             |                        |  |
| <b>7a-2</b>                | -1914.36936006         | -1914.10498806   | -1914.14866297             | -1913.88429097         | -1914.01189123  | -1913.74751923             |                        |  |
| <b>7a-3</b>                | -1914.36790766         | -1914.10357466   | -1914.14733659             | -1913.88300359         | -1914.01129940  | -1913.74696664             |                        |  |
| <b>7a-4</b>                | -1914.36562128         | -1914.10140628   | -1914.14491549             | -1913.88070049         | -1914.00864481  | -1913.74442981             |                        |  |
| <b>7a-5</b>                | -1914.37046055         | -1914.10704555   | -1914.14961148             | -1913.88619648         | -1914.01195294  | -1913.74853794             |                        |  |
| <b>7a-6</b>                | -1914.36976928         | -1914.10587828   | -1914.14909618             | -1913.88520518         | -1914.01219656  | -1913.74830556             |                        |  |
| <b>7a-7</b>                | -1914.36688658         | -1914.10302858   | -1914.14618278             | -1913.88232478         | -1914.00956577  | -1913.74570777             |                        |  |
| <b>7a-8</b>                | -1914.37078946         | -1914.10680746   | -1914.15033222             | -1913.88635022         | -1914.01323651  | -1913.74925451             |                        |  |
| <b>7a-9</b>                | -1914.36922485         | -1914.10558985   | -1914.14831487             | -1913.88467987         | -1914.01090188  | -1913.74726688             |                        |  |
| <b>7a-10</b>               | -1914.36455952         | -1914.10024852   | -1914.14396943             | -1913.87965843         | -1914.00741454  | -1913.74310354             |                        |  |
| <b>7a-11</b>               | -1914.36652171         | -1914.10225471   | -1914.14587465             | -1913.88160765         | -1914.00960845  | -1913.74534145             |                        |  |
| <b>7a-12</b>               | -1914.36639500         | -1914.10262000   | -1914.14583808             | -1913.88206308         | -1914.00894024  | -1913.74516524             |                        |  |
| <b>7a-13</b>               | -1914.36519480         | -1914.10112080   | -1914.14424588             | -1913.88017188         | -1914.00682103  | -1913.74274703             |                        |  |
| <b>7a-14</b>               | -1914.36401716         | -1914.10077116   | -1914.14315101             | -1913.87990501         | -1914.00574076  | -1913.74249476             |                        |  |
| <b>7a-15</b>               | -1914.36273918         | -1914.09961018   | -1914.14157422             | -1913.87844522         | -1914.00434922  | -1913.74122022             |                        |  |
| <b>7a-16</b>               | -1914.36263186         | -1914.09953386   | -1914.14138970             | -1913.87829170         | -1914.00397433  | -1913.74087633             |                        |  |
| $\Delta G(298)$ [kcal/mol] | Boltzmann distribution |                  | $\Delta G(298)$ [kcal/mol] | Boltzmann distribution |                 | $\Delta G(298)$ [kcal/mol] | Boltzmann distribution |  |
| <b>7a-1</b>                | 0.98                   | 9.9%             | 0.94                       | 10.2%                  | 0.55            | 14.4%                      |                        |  |
| <b>7a-2</b>                | 1.29                   | 7.2%             | 1.29                       | 7.2%                   | 1.09            | 8.4%                       |                        |  |
| <b>7a-3</b>                | 2.18                   | 3.0%             | 2.10                       | 3.2%                   | 1.44            | 5.9%                       |                        |  |
| <b>7a-4</b>                | 3.54                   | 0.8%             | 3.55                       | 0.8%                   | 3.03            | 1.2%                       |                        |  |
| <b>7a-5</b>                | 0.00                   | 26.3%            | 0.10                       | 23.7%                  | 0.45            | 15.9%                      |                        |  |
| <b>7a-6</b>                | 0.73                   | 12.6%            | 0.72                       | 12.7%                  | 0.60            | 13.7%                      |                        |  |
| <b>7a-7</b>                | 2.52                   | 2.1%             | 2.53                       | 2.1%                   | 2.23            | 2.7%                       |                        |  |
| <b>7a-8</b>                | 0.15                   | 22.6%            | 0.00                       | 26.1%                  | 0.00            | 24.9%                      |                        |  |
| <b>7a-9</b>                | 0.91                   | 10.5%            | 1.05                       | 9.2%                   | 1.25            | 7.2%                       |                        |  |
| <b>7a-10</b>               | 4.27                   | 0.4%             | 4.20                       | 0.4%                   | 3.86            | 0.5%                       |                        |  |
| <b>7a-11</b>               | 3.01                   | 1.3%             | 2.98                       | 1.3%                   | 2.46            | 2.1%                       |                        |  |
| <b>7a-12</b>               | 2.78                   | 1.6%             | 2.69                       | 1.8%                   | 2.57            | 1.9%                       |                        |  |
| <b>7a-13</b>               | 3.72                   | 0.6%             | 3.88                       | 0.5%                   | 4.08            | 0.4%                       |                        |  |
| <b>7a-14</b>               | 3.94                   | 0.5%             | 4.04                       | 0.5%                   | 4.24            | 0.4%                       |                        |  |
| <b>7a-15</b>               | 4.67                   | 0.2%             | 4.96                       | 0.2%                   | 5.04            | 0.2%                       |                        |  |
| <b>7a-16</b>               | 4.71                   | 0.2%             | 5.06                       | 0.2%                   | 5.26            | 0.1%                       |                        |  |

**Table S8.** Calculated energies of **7b** at MMFF94 and B3LYP/6-31G(d) levels of theory.

| Structural features |             |                     | B3LYP/6-31G(d), vacuum |        |                |                   |                                             | $\Delta G(298)$     |                               |
|---------------------|-------------|---------------------|------------------------|--------|----------------|-------------------|---------------------------------------------|---------------------|-------------------------------|
| CO <sub>2</sub> Me  | H2          | H-bond<br>(H2 to X) | MMFF94                 |        | e0 [Hartree]   | ZPVE<br>[Hartree] | G <sup>corr</sup> <sup>a</sup><br>[Hartree] | G(298)<br>[Hartree] | $\Delta G(298)$<br>[kcal/mol] |
|                     |             |                     | Energy<br>[kJ/mol]     |        |                |                   |                                             |                     |                               |
| <b>7b-1</b>         | $\psi_{ax}$ | <i>eq</i>           | C=O                    | 282.54 | -994.825578974 | 0.336524          | 0.287502                                    | -994.538076974      | 0.00                          |
| <b>7b-2</b>         | $\psi_{ax}$ | <i>eq</i>           | OCH <sub>3</sub>       | 289.74 | -994.823944440 | 0.336427          | 0.287525                                    | -994.536419440      | 1.04                          |
| <b>7b-3</b>         | $\psi_{ax}$ | <i>ax</i>           | none <sup>b</sup>      | 292.86 | -994.821156197 | 0.336384          | 0.287347                                    | -994.533809197      | 2.68                          |
| <b>7b-4</b>         | $\psi_{eq}$ | <i>eq</i>           | OCH <sub>3</sub>       | 295.43 | -994.821855495 | 0.336085          | 0.287207                                    | -994.534648495      | 2.15                          |
| <b>7b-5</b>         | $\psi_{eq}$ | <i>eq</i>           | C=O                    | 295.65 | -994.823088326 | 0.335979          | 0.287010                                    | -994.536078326      | 1.25                          |
| <b>7b-6</b>         | $\psi_{eq}$ | <i>ax</i>           | C=O                    | 296.65 | -994.822366886 | 0.336118          | 0.286375                                    | -994.535991886      | 1.31                          |
| <b>7b-7</b>         | $\psi_{ax}$ | <i>ax</i>           | none <sup>c</sup>      | 297.48 | -994.819721433 | 0.336393          | 0.287380                                    | -994.532341433      | 3.60                          |
| <b>7b-8</b>         | $\psi_{eq}$ | <i>ax</i>           | OCH <sub>3</sub>       | 301.06 | -994.820741727 | 0.336125          | 0.286397                                    | -994.534344727      | 2.34                          |

<sup>a</sup> Calculated at 298 K. <sup>b</sup> C=O is oriented towards N2 but H-bond is not geometrically possible. <sup>c</sup> OCH<sub>3</sub> is oriented towards N2 but H-bond is not geometrically possible.

**Table S9.** Calculated energies of **7b** at B3LYP/6-311+G(2d,p)// B3LYP/6-31G(d) (**Method 1**), mPW1PW91/6-311+G(2d,p)// B3LYP/6-31G(d) (**Method 2**), and M06-2X/def2-TZVP//B3LYP/6-31G(d) (**Method 3**), all with SCRF=(PCM, solvent=chloroform).

|             | Method 1                   |                        | Method 2                   |                        | Method 3                   |                        |
|-------------|----------------------------|------------------------|----------------------------|------------------------|----------------------------|------------------------|
|             | $e_0$ [Hartree]            | G(298) [Hartree]       | $e_0$ [Hartree]            | G(298) [Hartree]       | $e_0$ [Hartree]            | G(298) [Hartree]       |
| <b>7b-1</b> | -995.124145275             | -994.836643275         | -994.885390029             | -994.597888029         | -994.808015506             | -994.520513506         |
| <b>7b-2</b> | -995.123143164             | -994.835618164         | -994.884347134             | -994.596822134         | -994.806852067             | -994.519327067         |
| <b>7b-3</b> | -995.121060656             | -994.833713656         | -994.882227215             | -994.594880215         | -994.804934854             | -994.517587854         |
| <b>7b-4</b> | -995.122386525             | -994.835179525         | -994.883436878             | -994.596229878         | -994.805716591             | -994.518509591         |
| <b>7b-5</b> | -995.123558562             | -994.836548562         | -994.884865213             | -994.597855213         | -994.807044518             | -994.520034518         |
| <b>7b-6</b> | -995.123039313             | -994.836664313         | -994.884166772             | -994.597791772         | -994.806319801             | -994.519944801         |
| <b>7b-7</b> | -995.120364677             | -994.832984677         | -994.881664652             | -994.594284652         | -994.804021854             | -994.516641854         |
| <b>7b-8</b> | -995.121743096             | -994.835346096         | -994.882813198             | -994.596416198         | -994.805156824             | -994.518759824         |
|             | $\Delta G(298)$ [kcal/mol] | Boltzmann distribution | $\Delta G(298)$ [kcal/mol] | Boltzmann distribution | $\Delta G(298)$ [kcal/mol] | Boltzmann distribution |
| <b>7b-1</b> | 0.01                       | 21.8%                  | 0.00                       | 22.5%                  | 0.00                       | 26.5%                  |
| <b>7b-2</b> | 0.66                       | 11.5%                  | 0.67                       | 11.5%                  | 0.74                       | 12.6%                  |
| <b>7b-3</b> | 1.85                       | 3.5%                   | 1.89                       | 3.4%                   | 1.84                       | 4.2%                   |
| <b>7b-4</b> | 0.93                       | 8.7%                   | 1.04                       | 8.0%                   | 1.26                       | 7.5%                   |
| <b>7b-5</b> | 0.07                       | 20.6%                  | 0.02                       | 22.1%                  | 0.30                       | 19.6%                  |
| <b>7b-6</b> | 0.00                       | 22.1%                  | 0.06                       | 21.2%                  | 0.36                       | 18.5%                  |
| <b>7b-7</b> | 2.13                       | 2.2%                   | 2.26                       | 2.3%                   | 2.43                       | 2.3%                   |
| <b>7b-8</b> | 0.83                       | 9.7%                   | 0.92                       | 8.9%                   | 1.10                       | 8.8%                   |

**Table S10.** Calculated energies of **8a** at MMFF94 and B3LYP/6-31G(d) levels of theory.

| Structural features |                 |      |                     | B3LYP/6-31G(d), vacuum |                   |                                             |                     |                    | MMFF94                | G(298) |  |
|---------------------|-----------------|------|---------------------|------------------------|-------------------|---------------------------------------------|---------------------|--------------------|-----------------------|--------|--|
| CO <sub>2</sub> Me  | 2'-Cl           | H2   | H-bond<br>(H2 to X) | e0 [Hartree]           | ZPVE<br>[Hartree] | G <sub>corr</sub> <sup>a</sup><br>[Hartree] | G(298)<br>[Hartree] | Energy<br>[kJ/mol] | ΔG(298)<br>[kcal/mol] |        |  |
| <b>8a-1</b>         | ψ <sub>eq</sub> | exo  | eq                  | C=O                    | -1914.01456172    | 0.316708                                    | 0.264065            | 245.12             | 0.00                  |        |  |
| <b>8a-2</b>         | ψ <sub>eq</sub> | exo  | eq                  | OCH <sub>3</sub>       | -1914.01294988    | 0.316692                                    | 0.263776            | 245.59             | 0.83                  |        |  |
| <b>8a-3</b>         | ψ <sub>eq</sub> | exo  | ax                  | C=O                    | -1914.01130588    | 0.316766                                    | 0.263040            | 250.02             | 1.40                  |        |  |
| <b>8a-4</b>         | ψ <sub>ax</sub> | exo  | eq                  | OCH <sub>3</sub>       | -1914.00865712    | 0.316741                                    | 0.264333            | 253.85             | 3.87                  |        |  |
| <b>8a-5</b>         | ψ <sub>eq</sub> | exo  | ax                  | OCH <sub>3</sub>       | -1914.00985971    | 0.316841                                    | 0.263552            | 254.02             | 2.63                  |        |  |
| <b>8a-6</b>         | ψ <sub>eq</sub> | endo | ax                  | C=O                    | -1914.00844097    | 0.316665                                    | 0.263177            | 254.77             | 3.28                  |        |  |
| <b>8a-7</b>         | ψ <sub>eq</sub> | endo | ax                  | OCH <sub>3</sub>       | -1914.00728927    | 0.316802                                    | 0.263695            | 256.56             | 4.33                  |        |  |
| <b>8a-8</b>         | ψ <sub>ax</sub> | exo  | eq                  | C=O                    | -1914.00673342    | 0.316767                                    | 0.263866            | 258.34             | 4.79                  |        |  |
| <b>8a-9</b>         | ψ <sub>ax</sub> | exo  | ax                  | none <sup>c</sup>      | -1914.00511940    | 0.316734                                    | 0.264326            | 261.41             | 6.09                  |        |  |
| <b>8a-10</b>        | ψ <sub>eq</sub> | endo | eq                  | C=O                    | -1914.00857821    | 0.316494                                    | 0.263896            | 264.78             | 3.65                  |        |  |
| <b>8a-11</b>        | ψ <sub>eq</sub> | endo | eq                  | OCH <sub>3</sub>       | -1914.00725406    | 0.316492                                    | 0.263649            | 265.29             | 4.32                  |        |  |
| <b>8a-12</b>        | ψ <sub>ax</sub> | exo  | ax                  | none <sup>b</sup>      | -1914.00141662    | 0.316749                                    | 0.264237            | 272.62             | 8.36                  |        |  |
| <b>8a-13</b>        | ψ <sub>ax</sub> | endo | eq                  | C=O                    | -1913.99970041    | 0.316840                                    | 0.264779            | 277.59             | 9.77                  |        |  |
| <b>8a-14</b>        | ψ <sub>ax</sub> | endo | eq                  | OCH <sub>3</sub>       | -1913.99920233    | 0.316777                                    | 0.264989            | 282.12             | 10.22                 |        |  |

<sup>a</sup> Calculated at 298 K. <sup>b</sup> C=O is oriented towards N2 but H-bond is not geometrically possible. <sup>c</sup> OCH<sub>3</sub> is oriented towards N2 but H-bond is not geometrically possible.



**Table S11.** Calculated energies of **8a** at B3LYP/6-311+G(2d,p)// B3LYP/6-31G(d) (**Method 1**), mPW1PW91/6-311+G(2d,p)// B3LYP/6-31G(d) (**Method 2**), and M06-2X/def2-TZVP//B3LYP/6-31G(d) (**Method 3**), all with SCRF=(PCM, solvent=chloroform).

|              | Method 1                   |                        | Method 2                   |                        | Method 3                   |                        |
|--------------|----------------------------|------------------------|----------------------------|------------------------|----------------------------|------------------------|
|              | $e_0$ [Hartree]            | G(298) [Hartree]       | $e_0$ [Hartree]            | G(298) [Hartree]       | $e_0$ [Hartree]            | G(298) [Hartree]       |
| <b>8a-1</b>  | -1914.37124126             | -1914.10717626         | -1914.15049755             | -1913.88643255         | -1914.01302460             | -1913.74895960         |
| <b>8a-2</b>  | -1914.36989820             | -1914.10612220         | -1914.14888337             | -1913.88510737         | -1914.01156644             | -1913.74779044         |
| <b>8a-3</b>  | -1914.37047890             | -1914.10743890         | -1914.14935969             | -1913.88631969         | -1914.01118126             | -1913.74814126         |
| <b>8a-4</b>  | -1914.36621981             | -1914.10188681         | -1914.14589369             | -1913.88156069         | -1914.01210700             | -1913.74777400         |
| <b>8a-5</b>  | -1914.36935580             | -1914.10580380         | -1914.14819240             | -1913.88464040         | -1914.01023058             | -1913.74667858         |
| <b>8a-6</b>  | -1914.36846112             | -1914.10528412         | -1914.14743271             | -1913.88425571         | -1914.0101486              | -1913.74697160         |
| <b>8a-7</b>  | -1914.36752967             | -1914.10383467         | -1914.14644047             | -1913.88274547         | -1914.00914825             | -1913.74545325         |
| <b>8a-8</b>  | -1914.36485810             | -1914.1009210          | -1914.14449099             | -1913.88062499         | -1914.01007648             | -1913.74621048         |
| <b>8a-9</b>  | -1914.36411026             | -1914.09978426         | -1914.14384254             | -1913.87951654         | -1914.00945487             | -1913.74512887         |
| <b>8a-10</b> | -1914.36825899             | -1914.10436299         | -1914.14759393             | -1913.88369793         | -1914.01051805             | -1913.74662205         |
| <b>8a-11</b> | -1914.36716693             | -1914.10351793         | -1914.14624157             | -1913.88259257         | -1914.00930004             | -1913.74565104         |
| <b>8a-12</b> | -1914.36165907             | -1914.09742207         | -1914.14116815             | -1913.87693115         | -1914.00664588             | -1913.74240888         |
| <b>8a-13</b> | -1914.35865601             | -1914.09387701         | -1914.13801560             | -1913.87323660         | -1914.00390664             | -1913.73912764         |
| <b>8a-14</b> | -1914.35871373             | -1914.09372473         | -1914.13805779             | -1913.87306879         | -1914.00421326             | -1913.73922426         |
|              | $\Delta G(298)$ [kcal/mol] | Boltzmann distribution | $\Delta G(298)$ [kcal/mol] | Boltzmann distribution | $\Delta G(298)$ [kcal/mol] | Boltzmann distribution |
| <b>8a-1</b>  | 0.16                       | 25.7%                  | 0.00                       | 29.4%                  | 0.00                       | 26.1%                  |
| <b>8a-2</b>  | 0.83                       | 13.3%                  | 0.83                       | 12.8%                  | 0.73                       | 12.5%                  |
| <b>8a-3</b>  | 0.00                       | 30.3%                  | 0.07                       | 27.4%                  | 0.51                       | 15.6%                  |
| <b>8a-4</b>  | 3.48                       | 0.9%                   | 3.06                       | 1.4%                   | 0.74                       | 12.4%                  |
| <b>8a-5</b>  | 1.03                       | 10.9%                  | 1.12                       | 9.5%                   | 1.43                       | 6.2%                   |
| <b>8a-6</b>  | 1.35                       | 7.8%                   | 1.37                       | 7.5%                   | 1.25                       | 7.5%                   |
| <b>8a-7</b>  | 2.26                       | 3.2%                   | 2.31                       | 2.9%                   | 2.20                       | 2.9%                   |
| <b>8a-8</b>  | 4.05                       | 0.5%                   | 3.64                       | 0.8%                   | 1.73                       | 4.6%                   |
| <b>8a-9</b>  | 4.80                       | 0.2%                   | 4.34                       | 0.4%                   | 2.40                       | 2.4%                   |
| <b>8a-10</b> | 1.93                       | 4.4%                   | 1.72                       | 5.3%                   | 1.47                       | 6.0%                   |
| <b>8a-11</b> | 2.46                       | 2.6%                   | 2.41                       | 2.6%                   | 2.08                       | 3.3%                   |
| <b>8a-12</b> | 6.29                       | 0.1%                   | 5.96                       | 0.1%                   | 4.11                       | 0.4%                   |
| <b>8a-13</b> | 8.51                       | 0.0%                   | 8.28                       | 0.0%                   | 6.17                       | 0.1%                   |
| <b>8a-14</b> | 8.61                       | 0.0%                   | 8.39                       | 0.0%                   | 6.11                       | 0.1%                   |

**Table S12.** Calculated energies of **8b** at MMFF94 and B3LYP/6-31G(d) levels of theory.

| Structural features |             |                     | MMFF94             | B3LYP/6-31G(d), vacuum |                   |                                             |                     | $\Delta G(298)$ |
|---------------------|-------------|---------------------|--------------------|------------------------|-------------------|---------------------------------------------|---------------------|-----------------|
| CO <sub>2</sub> Me  | H2          | H-bond<br>(H2 to X) | Energy<br>[kJ/mol] | e0 [Hartree]           | ZPVE<br>[Hartree] | G <sub>corr</sub> <sup>a</sup><br>[Hartree] | G(298)<br>[Hartree] | [kcal/mol]      |
| <b>8b-1</b>         | $\psi_{eq}$ | ax                  | 291.03             | -994.823809034         | 0.336080          | 0.286129                                    | -994.537680034      | 0.73            |
| <b>8b-2</b>         | $\psi_{eq}$ | eq                  | 291.46             | -994.824456311         | 0.336034          | 0.286823                                    | -994.537633311      | 0.76            |
| <b>8b-3</b>         | $\psi_{eq}$ | eq                  | 291.87             | -994.825784125         | 0.336026          | 0.286945                                    | -994.538839125      | 0.00            |
| <b>8b-4</b>         | $\psi_{eq}$ | ax                  | 293.71             | -994.822507772         | 0.336175          | 0.286669                                    | -994.535838772      | 1.88            |
| <b>8b-5</b>         | $\psi_{ax}$ | eq                  | 295.00             | -994.819243218         | 0.336164          | 0.287649                                    | -994.531594218      | 4.55            |
| <b>8b-6</b>         | $\psi_{ax}$ | eq                  | 301.90             | -994.817316664         | 0.336256          | 0.287156                                    | -994.530160664      | 5.45            |
| <b>8b-7</b>         | $\psi_{ax}$ | ax                  | 304.78             | -994.815792636         | 0.336267          | 0.288082                                    | -994.527710636      | 6.42            |
| <b>8b-8</b>         | $\psi_{ax}$ | ax                  | 315.26             | -994.812854690         | 0.336270          | 0.287749                                    | -994.52510569       | 8.27            |

<sup>a</sup> Calculated at 298 K. <sup>b</sup> C=O is oriented towards N2 but H-bond is not geometrically possible. <sup>c</sup> OCH<sub>3</sub> is oriented towards N2 but H-bond is not geometrically possible.

**Table S13.** Calculated energies of **8b** at B3LYP/6-311+G(2d,p)// B3LYP/6-31G(d) (**Method 1**), mPW1PW91/6-311+G(2d,p)// B3LYP/6-31G(d) (**Method 2**), and M06-2X/def2-TZVP//B3LYP/6-31G(d) (**Method 3**), all with SCRF=(PCM, solvent=chloroform).

|             | Method 1                   |                        | Method 2                   |                        | Method 3                   |                        |
|-------------|----------------------------|------------------------|----------------------------|------------------------|----------------------------|------------------------|
|             | $e_0$ [Hartree]            | G(298) [Hartree]       | $e_0$ [Hartree]            | G(298) [Hartree]       | $e_0$ [Hartree]            | G(298) [Hartree]       |
| <b>8b-1</b> | -995.124312659             | -994.838183659         | -994.885065648             | -994.598936648         | -994.806461995             | -994.520332995         |
| <b>8b-2</b> | -995.123982150             | -994.837159150         | -994.884864392             | -994.598041392         | -994.806701119             | -994.51987819          |
| <b>8b-3</b> | -995.125082968             | -994.838137968         | -994.886229910             | -994.599284910         | -994.807950115             | -994.521005115         |
| <b>8b-4</b> | -995.123213232             | -994.836544232         | -994.883953279             | -994.597284279         | -994.805695866             | -994.519026866         |
| <b>8b-5</b> | -995.118342782             | -994.830693782         | -994.879675706             | -994.592026706         | -994.804884848             | -994.517235848         |
| <b>8b-6</b> | -995.116968010             | -994.829812010         | -994.878223751             | -994.591067751         | -994.802598341             | -994.515442341         |
| <b>8b-7</b> | -995.116184082             | -994.828102082         | -994.877885019             | -994.589803019         | -994.803579255             | -994.515497255         |
| <b>8b-8</b> | -995.113689095             | -994.825940095         | -994.875248592             | -994.587499592         | -994.800781284             | -994.513032284         |
|             | $\Delta G(298)$ [kcal/mol] | Boltzmann distribution | $\Delta G(298)$ [kcal/mol] | Boltzmann distribution | $\Delta G(298)$ [kcal/mol] | Boltzmann distribution |
| <b>8b-1</b> | 0.00                       | 34.8%                  | 0.22                       | 31.3%                  | 0.42                       | 25.2%                  |
| <b>8b-2</b> | 0.64                       | 18.3%                  | 0.78                       | 17.9%                  | 0.71                       | 19.0%                  |
| <b>8b-3</b> | 0.03                       | 33.8%                  | 0.00                       | 39.0%                  | 0.00                       | 38.5%                  |
| <b>8b-4</b> | 1.03                       | 12.4%                  | 1.26                       | 11.1%                  | 1.24                       | 11.1%                  |
| <b>8b-5</b> | 4.70                       | 0.3%                   | 4.55                       | 0.4%                   | 2.37                       | 3.6%                   |
| <b>8b-6</b> | 5.25                       | 0.2%                   | 5.16                       | 0.2%                   | 3.49                       | 1.2%                   |
| <b>8b-7</b> | 5.74                       | 0.1%                   | 5.95                       | 0.1%                   | 3.46                       | 1.2%                   |
| <b>8b-8</b> | 7.30                       | 0.0%                   | 7.40                       | 0.0%                   | 5.00                       | 0.3%                   |

**Table S14.** Boltzmann distribution of conformer ensembles of **7a**, **8a**, **7b**, **8b** [%] See Tables S7, S9, S11, S13 for the Boltzmann weights of individual conformers.

| Method                                           | 7a   |      |      | 8a   |      |      | 7b   |      |      | 8b   |      |      |
|--------------------------------------------------|------|------|------|------|------|------|------|------|------|------|------|------|
|                                                  | M1   | M2   | M3   |
| <b>3-CO<sub>2</sub>Me-<math>\psi_{ax}</math></b> | 26.3 | 26.9 | 37.2 | 1.8  | 2.6  | 19.9 | 39.0 | 39.8 | 45.6 | 0.6  | 0.8  | 6.3  |
| <b>3-CO<sub>2</sub>Me-<math>\psi_{eq}</math></b> | 73.7 | 73.1 | 62.8 | 98.2 | 97.4 | 80.1 | 61.0 | 60.2 | 54.4 | 99.4 | 99.2 | 93.7 |
| <b>2'-Cl<sub>exo</sub></b>                       | 93.0 | 93.0 | 89.1 | 82.0 | 81.7 | 80.2 | –    | –    | –    | –    | –    | –    |
| <b>2'-Cl<sub>endo</sub></b>                      | 7.0  | 7.0  | 10.9 | 18.0 | 18.3 | 19.8 | –    | –    | –    | –    | –    | –    |
| <b>H-2<sub>ax</sub></b>                          | 42.6 | 38.6 | 30.0 | 52.5 | 47.8 | 35.0 | 37.4 | 35.9 | 33.9 | 47.4 | 42.5 | 37.8 |
| <b>H-2<sub>eq</sub></b>                          | 57.4 | 61.4 | 70.0 | 47.5 | 52.2 | 65.0 | 62.6 | 64.1 | 66.1 | 52.6 | 57.5 | 62.2 |
| <b>H-bonding<sup>a</sup></b>                     | 95.1 | 95.0 | 93.7 | 99.7 | 99.5 | 97.2 | 94.3 | 94.2 | 93.5 | 99.9 | 99.9 | 98.5 |
| <b>H-bond to C=O</b>                             | 62.9 | 64.2 | 61.9 | 68.9 | 70.3 | 59.9 | 64.5 | 65.8 | 64.6 | 68.8 | 70.5 | 64.8 |
| <b>H-bond to OMe</b>                             | 32.2 | 30.7 | 31.7 | 30.8 | 29.3 | 37.3 | 29.8 | 28.4 | 28.9 | 31.1 | 29.4 | 33.7 |
| <b>No H-bond<sup>a</sup></b>                     | 4.9  | 5.0  | 6.3  | 0.3  | 0.5  | 2.8  | 5.7  | 5.8  | 6.5  | 0.1  | 0.1  | 1.5  |

Methods used for determination of conformer energies:

M1 – B3LYP/6-311+G(2d,p)//B3LYP/6-31G(d), SCRF=(PCM, solvent=chloroform),

M2 – mPW1PW91/6-311+G(2d,p)//B3LYP/6-31G(d), SCRF=(PCM, solvent=chloroform),

M3 – M06-2X/def2-TZVP//B3LYP/6-31G(d), SCRF=(PCM, solvent=chloroform).

<sup>a</sup>H-bonding assumed for H-2...O distance ranging between 2.3 Å and 2.7 Å. For those conformers described as “No H-bonding”, this distance was  $\geq 3.7$  Å.

**Table S15.** Calculated (B3LYP/6-31G(d,p)u+1s//B3LYP/6-31G(d))  $^1\text{H}$ - $^1\text{H}$  coupling constants for all conformers of **7a**, **8a**, **7b**, **8b**.<sup>a</sup>

|                             | <b>7a-01</b> | <b>7a-02</b> | <b>7a-03</b> | <b>7a-04</b> | <b>7a-05</b> | <b>7a-06</b> | <b>7a-07</b> | <b>7a-08</b> |
|-----------------------------|--------------|--------------|--------------|--------------|--------------|--------------|--------------|--------------|
| $^3J_{4\beta-3}$ [Hz]       | 1.8          | 1.5          | 1.6          | 1.0          | 10.7         | 10.8         | 1.0          | 11.0         |
| $^3J_{4\alpha-3}$ [Hz]      | 5.7          | 5.9          | 6.0          | 7.0          | 4.2          | 3.9          | 6.8          | 3.7          |
| $^2J_{4\alpha-4\beta}$ [Hz] | -15.1        | -15.0        | -15.2        | -16.0        | -15.3        | -15.9        | -16.0        | -15.0        |
| $^5J_{4\beta-1}$ [Hz]       | 1.8          | 2.0          | 1.8          | 2.1          | 2.0          | 1.7          | 2.0          | 1.7          |
| $^5J_{4\alpha-1}$ [Hz]      | 2.9          | 2.9          | 3.2          | 3.3          | 0.5          | 0.5          | 3.0          | 0.5          |
|                             | <b>7a-09</b> | <b>7a-10</b> | <b>7a-11</b> | <b>7a-12</b> | <b>7a-13</b> | <b>7a-14</b> | <b>7a-15</b> | <b>7a-16</b> |
| $^3J_{4\beta-3}$ [Hz]       | 10.8         | 1.0          | 1.5          | 1.0          | 10.6         | 10.7         | 10.5         | 10.6         |
| $^3J_{4\alpha-3}$ [Hz]      | 4.2          | 6.5          | 6.0          | 6.4          | 3.6          | 3.5          | 3.6          | 3.2          |
| $^2J_{4\alpha-4\beta}$ [Hz] | -15.5        | -15.7        | -15.1        | -15.7        | -14.3        | -14.8        | -15.7        | -14.4        |
| $^5J_{4\beta-1}$ [Hz]       | 2.0          | 2.2          | 1.9          | 2.2          | 2.7          | 2.4          | 2.5          | 2.8          |
| $^5J_{4\alpha-1}$ [Hz]      | 0.5          | 3.3          | 3.2          | 3.1          | 0.9          | 0.8          | 0.8          | 0.9          |
|                             | <b>8a-01</b> | <b>8a-02</b> | <b>8a-03</b> | <b>8a-04</b> | <b>8a-05</b> | <b>8a-06</b> | <b>8a-07</b> | <b>8a-08</b> |
| $^3J_{4\beta-3}$ [Hz]       | 10.9         | 10.7         | 10.5         | 0.9          | 10.7         | 10.7         | 10.8         | 1.0          |
| $^3J_{4\alpha-3}$ [Hz]      | 3.5          | 3.6          | 4.1          | 6.7          | 4.0          | 4.2          | 4.1          | 6.8          |
| $^2J_{4\alpha-4\beta}$ [Hz] | -14.7        | -15.6        | -15.1        | -15.4        | -15.3        | -15.1        | -15.2        | -15.8        |
| $^5J_{4\beta-1}$ [Hz]       | 2.9          | 3.0          | 3.1          | 0.6          | 3.1          | 3.2          | 3.3          | 0.6          |
| $^5J_{4\alpha-1}$ [Hz]      | 2.0          | 1.9          | 2.1          | 2.0          | 2.1          | 2.2          | 2.2          | 2.0          |
|                             | <b>8a-09</b> | <b>8a-10</b> | <b>8a-11</b> | <b>8a-12</b> | <b>8a-13</b> | <b>8a-14</b> |              |              |
| $^3J_{4\beta-3}$ [Hz]       | 0.6          | 10.8         | 10.7         | 0.6          | 1.2          | 1.1          |              |              |
| $^3J_{4\alpha-3}$ [Hz]      | 6.5          | 3.5          | 3.8          | 6.7          | 7.0          | 7.0          |              |              |
| $^2J_{4\alpha-4\beta}$ [Hz] | -16.0        | -14.7        | -15.6        | -16.3        | -15.8        | -15.5        |              |              |
| $^5J_{4\beta-1}$ [Hz]       | 0.7          | 3.1          | 3.2          | 0.6          | 0.9          | 1.0          |              |              |
| $^5J_{4\alpha-1}$ [Hz]      | 2.3          | 1.9          | 1.9          | 2.2          | 2.8          | 2.8          |              |              |
|                             | <b>7b-01</b> | <b>7b-02</b> | <b>7b-03</b> | <b>7b-04</b> | <b>7b-05</b> | <b>7b-06</b> | <b>7b-07</b> | <b>7b-08</b> |
| $^3J_{4\beta-3}$ [Hz]       | 1.5          | 1.3          | 1.0          | 10.7         | 10.9         | 10.8         | 1.0          | 1.5          |
| $^3J_{4\alpha-3}$ [Hz]      | 6.2          | 6.2          | 6.9          | 3.7          | 3.6          | 4.6          | 6.4          | 6.2          |
| $^2J_{4\alpha-4\beta}$ [Hz] | -15.3        | -15.1        | -15.9        | -15.7        | -14.8        | -15.5        | -15.6        | -15.3        |
| $^5J_{4\beta-1}$ [Hz]       | 1.9          | 2.1          | 2.1          | 1.8          | 1.8          | 1.8          | 2.3          | 1.9          |
| $^5J_{4\alpha-1}$ [Hz]      | 3.1          | 3.1          | 3.1          | 0.5          | 0.5          | 0.5          | 3.1          | 3.1          |
|                             | <b>8b-01</b> | <b>8b-02</b> | <b>8b-03</b> | <b>8b-04</b> | <b>8b-05</b> | <b>8b-06</b> | <b>8b-07</b> | <b>8b-08</b> |
| $^3J_{4\beta-3}$ [Hz]       | 10.6         | 10.7         | 11.0         | 10.7         | 1.1          | 1.3          | 0.6          | 0.5          |
| $^3J_{4\alpha-3}$ [Hz]      | 4.1          | 3.9          | 3.7          | 4.0          | 6.4          | 6.2          | 6.6          | 6.9          |
| $^2J_{4\alpha-4\beta}$ [Hz] | -15.0        | -15.6        | -14.7        | -15.2        | -15.2        | -15.5        | -16.0        | -16.5        |
| $^5J_{4\beta-1}$ [Hz]       | 3.1          | 3.1          | 3.0          | 3.1          | 0.7          | 0.6          | 0.6          | 0.5          |
| $^5J_{4\alpha-1}$ [Hz]      | 2.2          | 2.0          | 2.0          | 2.2          | 2.3          | 2.4          | 2.1          | 1.9          |

<sup>a</sup>Only Fermi contact terms (major contributor to  $J_{\text{HH}}$ ) were included to calculate  $J_{\text{HH}}$ ; values have been scaled by 0.9117 as recommended. To perform these calculations in Gaussian09, the following route was used: #n B3LYP/6-31G(d,p) nmr=(fonly,readatoms) iop(3/10=1100000) specifying the desired H atoms at the end of the molecule specification (e.g. atom=16,25,40,41 for **7a**, preceded by a blank line; route recommended by the CHESHIRE Chemical Shift Repository <http://cheshirenmr.info/Recommendations.htm> ).

**Table S16.** Observed and Calculated Boltzmann weighted average  $^1\text{H}$ - $^1\text{H}$  coupling constants for **7a**, **8a**, **7b**, **8b**, and RMSD values, based on Tables S7, S9, S11, S13, and S15.

| Boltzmann distribution based on: |          |                   |       |                   |       |                   |       |
|----------------------------------|----------|-------------------|-------|-------------------|-------|-------------------|-------|
| 7a                               | Observed | M1                |       | M2                |       | M3                |       |
|                                  |          | $ J_{\text{HH}} $ | Error | $ J_{\text{HH}} $ | Error | $ J_{\text{HH}} $ | Error |
| $^3J_{4\beta-3}$ [Hz]            | 7.8      | 8.4               | 0.6   | 8.3               | 0.5   | 7.4               | 0.4   |
| $^3J_{4\alpha-3}$ [Hz]           | 5.0      | 4.5               | 0.5   | 4.5               | 0.5   | 4.7               | 0.3   |
| $^2J_{4\alpha-4\beta}$ [Hz]      | 15.4     | 15.3              | 0.1   | 15.3              | 0.1   | 15.3              | 0.1   |
| $^5J_{4\beta-1}$ [Hz]            | 1.5      | 1.9               | 0.4   | 1.9               | 0.4   | 1.9               | 0.4   |
| $^5J_{4\alpha-1}$ [Hz]           | 1.2      | 1.2               | 0.0   | 1.2               | 0.0   | 1.4               | 0.2   |

  

| 8a                          | Observed | M1                |       | M2                |       | M3                |       |
|-----------------------------|----------|-------------------|-------|-------------------|-------|-------------------|-------|
|                             |          | $ J_{\text{HH}} $ | Error | $ J_{\text{HH}} $ | Error | $ J_{\text{HH}} $ | Error |
| $^3J_{4\beta-3}$ [Hz]       | 11.0     | 10.5              | 0.5   | 10.5              | 0.5   | 8.8               | 2.2   |
| $^3J_{4\alpha-3}$ [Hz]      | 4.1      | 3.9               | 0.2   | 3.9               | 0.2   | 4.4               | 0.3   |
| $^2J_{4\alpha-4\beta}$ [Hz] | 15.1     | 15.1              | 0.0   | 15.1              | 0.0   | 15.2              | 0.1   |
| $^5J_{4\beta-1}$ [Hz]       | 2.5      | 3.0               | 0.5   | 3.0               | 0.5   | 2.6               | 0.1   |
| $^5J_{4\alpha-1}$ [Hz]      | 1.9      | 2.1               | 0.2   | 2.0               | 0.1   | 2.0               | 0.1   |

  

| 7b                          | Observed | M1                |       | M2                |       | M3                |       |
|-----------------------------|----------|-------------------|-------|-------------------|-------|-------------------|-------|
|                             |          | $ J_{\text{HH}} $ | Error | $ J_{\text{HH}} $ | Error | $ J_{\text{HH}} $ | Error |
| $^3J_{4\beta-3}$ [Hz]       | 6.8      | 6.2               | 0.6   | 6.2               | 0.6   | 5.7               | 1.1   |
| $^3J_{4\alpha-3}$ [Hz]      | 5.4      | 5.1               | 0.3   | 5.1               | 0.3   | 5.2               | 0.2   |
| $^2J_{4\alpha-4\beta}$ [Hz] | 15.4     | 15.3              | 0.1   | 15.3              | 0.1   | 15.3              | 0.1   |
| $^5J_{4\beta-1}$ [Hz]       | 1.6      | 1.9               | 0.3   | 1.9               | 0.3   | 1.9               | 0.3   |
| $^5J_{4\alpha-1}$ [Hz]      | 1.4      | 1.8               | 0.4   | 1.8               | 0.4   | 1.9               | 0.5   |

  

| 8b                          | Observed | M1                |       | M2                |       | M3                |       |
|-----------------------------|----------|-------------------|-------|-------------------|-------|-------------------|-------|
|                             |          | $ J_{\text{HH}} $ | Error | $ J_{\text{HH}} $ | Error | $ J_{\text{HH}} $ | Error |
| $^3J_{4\beta-3}$ [Hz]       | 11.2     | 10.7              | 0.5   | 10.7              | 0.5   | 10.2              | 1.0   |
| $^3J_{4\alpha-3}$ [Hz]      | 4.3      | 4.0               | 0.3   | 3.9               | 0.4   | 4.1               | 0.2   |
| $^2J_{4\alpha-4\beta}$ [Hz] | 15.2     | 15.0              | 0.2   | 15.0              | 0.2   | 15.1              | 0.1   |
| $^5J_{4\beta-1}$ [Hz]       | 2.6      | 3.0               | 0.4   | 3.0               | 0.4   | 2.9               | 0.3   |
| $^5J_{4\alpha-1}$ [Hz]      | 1.9      | 2.1               | 0.2   | 2.1               | 0.2   | 2.1               | 0.2   |

  

|           |  |     |     |     |
|-----------|--|-----|-----|-----|
| RMSD [Hz] |  | 0.4 | 0.4 | 0.6 |
| MAD [Hz]  |  | 0.3 | 0.3 | 0.4 |

M1 – B3LYP/6-311+G(2d,p)//B3LYP/6-31G(d), SCRF(PCM=chloroform),

M2 – mPW1PW91/6-311+G(2d,p)//B3LYP/6-31G(d), SCRF(PCM=chloroform),

M3 – M06-2X/def2-TZVP//B3LYP/6-31G(d), SCRF(PCM=chloroform).

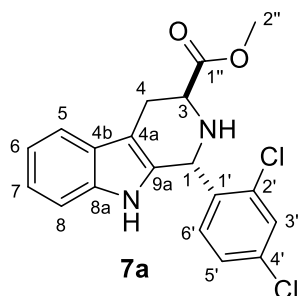

**Table S17.** Calculated Boltzmann weighted average  $^{13}\text{C}$  NMR compared to experimentally obtained chemical shifts in compound **7a**.  $^{13}\text{C}$  NMR shifts were calculated by B3LYP/6-311+G(2d,p)//B3LYP/6-31G(d), SCRF=(PCM,solvent=chloroform) (method **M1**) and mPW1PW91/6-311+G(2d,p)//B3LYP/6-31G(d), SCRF=(PCM,solvent=chloroform) (methods **M2**, and **M3**).

| Carbon     | $^{13}\text{C}$ NMR Chemical shifts [ppm] |       |       |       |                           |                           |                           |
|------------|-------------------------------------------|-------|-------|-------|---------------------------|---------------------------|---------------------------|
|            | Exp.                                      | M1    | M2    | M3    | $\Delta_{\text{M1-Exp.}}$ | $\Delta_{\text{M2-Exp.}}$ | $\Delta_{\text{M3-Exp.}}$ |
| <b>1</b>   | 51.3                                      | 53.6  | 52.9  | 53.1  | 2.3                       | 1.6                       | 1.8                       |
| <b>3</b>   | 52.3                                      | 54.5  | 53.4  | 53.9  | 2.2                       | 1.1                       | 1.6                       |
| <b>4</b>   | 25.0                                      | 27.5  | 26.8  | 26.5  | 2.5                       | 1.8                       | 1.5                       |
| <b>4a</b>  | 109.8                                     | 111.0 | 110.5 | 110.1 | 1.2                       | 0.7                       | 0.3                       |
| <b>4b</b>  | 126.9                                     | 126.9 | 126.2 | 126.1 | 0.0                       | -0.7                      | -0.8                      |
| <b>5</b>   | 118.5                                     | 116.7 | 117.4 | 117.3 | -1.8                      | -1.1                      | -1.2                      |
| <b>6</b>   | 119.9                                     | 118.2 | 118.5 | 118.4 | -1.7                      | -1.4                      | -1.5                      |
| <b>7</b>   | 122.5                                     | 120.6 | 121.0 | 120.9 | -1.9                      | -1.5                      | -1.6                      |
| <b>8</b>   | 111.2                                     | 108.8 | 109.4 | 109.4 | -2.4                      | -1.8                      | -1.8                      |
| <b>8a</b>  | 136.3                                     | 135.4 | 134.7 | 134.7 | -0.9                      | -1.6                      | -1.6                      |
| <b>9a</b>  | 131.6                                     | 131.8 | 131.4 | 131.5 | 0.2                       | -0.2                      | -0.1                      |
| <b>1'</b>  | 137.9                                     | 140.2 | 139.2 | 139.3 | 2.3                       | 1.3                       | 1.4                       |
| <b>2'</b>  | 134.0                                     | 142.3 | 141.2 | 141.1 | 8.3                       | 7.2                       | 7.1                       |
| <b>3'</b>  | 129.9                                     | 129.7 | 129.8 | 129.8 | -0.2                      | -0.1                      | -0.1                      |
| <b>4'</b>  | 134.0                                     | 141.4 | 140.4 | 140.4 | 7.4                       | 6.4                       | 6.4                       |
| <b>5'</b>  | 127.4                                     | 126.1 | 126.3 | 126.4 | -1.3                      | -1.1                      | -1.0                      |
| <b>6'</b>  | 131.0                                     | 130.3 | 130.7 | 131.0 | -0.7                      | -0.3                      | 0.0                       |
| <b>1''</b> | 173.8                                     | 176.0 | 175.3 | 175.4 | 2.2                       | 1.5                       | 1.6                       |
| <b>2''</b> | 52.4                                      | 51.5  | 51.5  | 51.5  | -0.9                      | -0.9                      | -0.9                      |

Methods used for determination of conformer energies:

M1 – B3LYP/6-311+G(2d,p)//B3LYP/6-31G(d), SCRF=(PCM,solvent=chloroform),

M2 – mPW1PW91/6-311+G(2d,p)//B3LYP/6-31G(d), SCRF=(PCM,solvent=chloroform)

M3 – M06-2X/def2-TZVP//B3LYP/6-31G(d), SCRF=(PCM,solvent=chloroform)

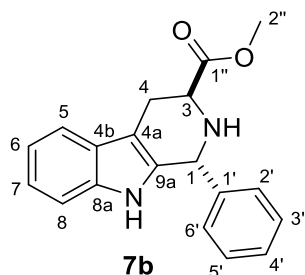

**Table S18.** Calculated Boltzmann weighted average  $^{13}\text{C}$  NMR compared to experimentally obtained chemical shifts in compound **7b**.  $^{13}\text{C}$  NMR shifts were calculated by B3LYP/6-311+G(2d,p)//B3LYP/6-31G(d), SCRF=(PCM,solvent=chloroform) (method **M1**) and mPW1PW91/6-311+G(2d,p)//B3LYP/6-31G(d), SCRF=(PCM,solvent=chloroform) (methods **M2**, and **M3**).

| Carbon     | $^{13}\text{C}$ NMR Chemical shifts [ppm] |       |       |       |                           |                           |                           |
|------------|-------------------------------------------|-------|-------|-------|---------------------------|---------------------------|---------------------------|
|            | Exp.                                      | M1    | M2    | M3    | $\Delta_{\text{M1-Exp.}}$ | $\Delta_{\text{M2-Exp.}}$ | $\Delta_{\text{M3-Exp.}}$ |
| <b>1</b>   | 55.1                                      | 57.6  | 56.6  | 56.5  | 2.5                       | 1.5                       | 1.4                       |
| <b>3</b>   | 52.7                                      | 55.0  | 54.0  | 54.3  | 2.3                       | 1.3                       | 1.6                       |
| <b>4</b>   | 24.8                                      | 27.0  | 26.4  | 26.2  | 2.2                       | 1.6                       | 1.4                       |
| <b>4a</b>  | 108.6                                     | 109.1 | 108.7 | 108.4 | 0.5                       | 0.1                       | -0.2                      |
| <b>4b</b>  | 127.1                                     | 127.6 | 126.8 | 126.8 | 0.5                       | -0.3                      | -0.3                      |
| <b>5</b>   | 118.4                                     | 116.5 | 117.2 | 117.2 | -1.9                      | -1.2                      | -1.2                      |
| <b>6</b>   | 119.7                                     | 118.2 | 118.5 | 118.4 | -1.5                      | -1.2                      | -1.3                      |
| <b>7</b>   | 122.1                                     | 120.2 | 120.6 | 120.5 | -1.9                      | -1.5                      | -1.6                      |
| <b>8</b>   | 111.0                                     | 109.0 | 109.6 | 109.5 | -2.0                      | -1.4                      | -1.5                      |
| <b>8a</b>  | 136.3                                     | 135.7 | 134.8 | 134.8 | -0.6                      | -1.5                      | -1.5                      |
| <b>9a</b>  | 133.3                                     | 134.2 | 133.7 | 133.8 | 0.9                       | 0.4                       | 0.5                       |
| <b>1'</b>  | 142.1                                     | 144.9 | 143.8 | 143.8 | 2.8                       | 1.7                       | 1.7                       |
| <b>2'</b>  | 128.6                                     | 129.2 | 129.4 | 129.3 | 0.6                       | 0.8                       | 0.7                       |
| <b>3'</b>  | 128.9                                     | 127.8 | 128.1 | 128.1 | -1.1                      | -0.8                      | -0.8                      |
| <b>4'</b>  | 128.3                                     | 126.8 | 127.3 | 127.3 | -1.5                      | -1.0                      | -1.0                      |
| <b>5'</b>  | 128.9                                     | 127.4 | 127.8 | 127.8 | -1.5                      | -1.1                      | -1.1                      |
| <b>6'</b>  | 128.6                                     | 127.2 | 127.5 | 127.6 | -1.4                      | -1.1                      | -1.0                      |
| <b>1''</b> | 174.3                                     | 176.4 | 175.8 | 175.9 | 2.1                       | 1.5                       | 1.6                       |
| <b>2''</b> | 52.3                                      | 51.3  | 51.3  | 51.3  | -1.0                      | -1.0                      | -1.0                      |

Methods used for determination of conformer energies:

M1 – B3LYP/6-311+G(2d,p)//B3LYP/6-31G(d), SCRF=(PCM,solvent=chloroform),

M2 – mPW1PW91/6-311+G(2d,p)//B3LYP/6-31G(d), SCRF=(PCM,solvent=chloroform)

M3 – M06-2X/def2-TZVP//B3LYP/6-31G(d), SCRF=(PCM,solvent=chloroform)



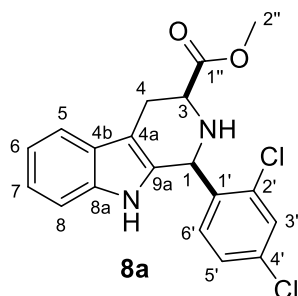

**Table S19.** Calculated Boltzmann weighted average  $^{13}\text{C}$  NMR compared to experimentally obtained chemical shifts in compound **8a**.  $^{13}\text{C}$  NMR shifts were calculated by B3LYP/6-311+G(2d,p)//B3LYP/6-31G(d), SCRF=(PCM,solvent=chloroform) (method **M1**) and mPW1PW91/6-311+G(2d,p)//B3LYP/6-31G(d), SCRF=(PCM,solvent=chloroform) (methods **M2**, and **M3**).

| Carbon     | $^{13}\text{C}$ NMR Chemical shifts [ppm] |       |       |       |                           |                           |                           |
|------------|-------------------------------------------|-------|-------|-------|---------------------------|---------------------------|---------------------------|
|            | Exp.                                      | M1    | M2    | M3    | $\Delta_{\text{M1-Exp.}}$ | $\Delta_{\text{M2-Exp.}}$ | $\Delta_{\text{M3-Exp.}}$ |
| <b>1</b>   | 53.9                                      | 56.6  | 55.8  | 55.6  | 2.7                       | 1.9                       | 1.7                       |
| <b>3</b>   | 56.7                                      | 58.9  | 57.5  | 56.8  | 2.2                       | 0.8                       | 0.1                       |
| <b>4</b>   | 25.5                                      | 27.7  | 26.9  | 26.1  | 2.2                       | 1.4                       | 0.6                       |
| <b>4a</b>  | 109.5                                     | 109.8 | 109.1 | 109.1 | 0.3                       | -0.4                      | -0.4                      |
| <b>4b</b>  | 127                                       | 127.2 | 126.5 | 126.4 | 0.2                       | -0.5                      | -0.6                      |
| <b>5</b>   | 118.4                                     | 116.8 | 117.6 | 117.6 | -1.6                      | -0.8                      | -0.8                      |
| <b>6</b>   | 119.9                                     | 118.3 | 118.5 | 118.4 | -1.6                      | -1.4                      | -1.5                      |
| <b>7</b>   | 122.3                                     | 120.5 | 120.9 | 120.8 | -1.8                      | -1.4                      | -1.5                      |
| <b>8</b>   | 111.1                                     | 109.1 | 109.7 | 109.6 | -2.0                      | -1.4                      | -1.5                      |
| <b>8a</b>  | 136.3                                     | 134.7 | 134   | 134.1 | -1.6                      | -2.3                      | -2.2                      |
| <b>9a</b>  | 133.3                                     | 133.5 | 133   | 132.6 | 0.2                       | -0.3                      | -0.7                      |
| <b>1'</b>  | 137.4                                     | 139.5 | 138.6 | 138.8 | 2.1                       | 1.2                       | 1.4                       |
| <b>2'</b>  | 134.2                                     | 142.2 | 141.1 | 141.0 | 8.0                       | 6.9                       | 6.8                       |
| <b>3'</b>  | 129.5                                     | 129.5 | 129.6 | 129.6 | 0.0                       | 0.1                       | 0.1                       |
| <b>4'</b>  | 134.7                                     | 141.8 | 140.9 | 140.8 | 7.1                       | 6.2                       | 6.1                       |
| <b>5'</b>  | 128.1                                     | 127   | 127.2 | 127.1 | -1.1                      | -0.9                      | -1.0                      |
| <b>6'</b>  | 131.5                                     | 131.1 | 131.4 | 131.6 | -0.4                      | -0.1                      | 0.1                       |
| <b>1''</b> | 173.1                                     | 175.5 | 174.9 | 175.1 | 2.4                       | 1.8                       | 2.0                       |
| <b>2''</b> | 52.5                                      | 51.6  | 51.7  | 51.5  | -0.9                      | -0.8                      | -1.0                      |

Methods used for determination of conformer energies:

M1 – B3LYP/6-311+G(2d,p)//B3LYP/6-31G(d), SCRF=(PCM,solvent=chloroform),

M2 – mPW1PW91/6-311+G(2d,p)//B3LYP/6-31G(d), SCRF=(PCM,solvent=chloroform)

M3 – M06-2X/def2-TZVP//B3LYP/6-31G(d), SCRF=(PCM,solvent=chloroform)

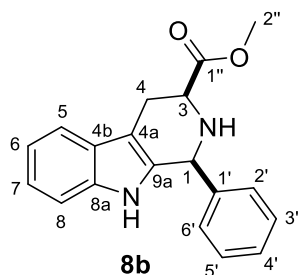

**Table S20.** Calculated Boltzmann weighted average  $^{13}\text{C}$  NMR compared to experimentally obtained chemical shifts in compound **8b**.  $^{13}\text{C}$  NMR shifts were calculated by B3LYP/6-311+G(2d,p)//B3LYP/6-31G(d), SCRF=(PCM,solvent=chloroform) (method **M1**) and mPW1PW91/6-311+G(2d,p)//B3LYP/6-31G(d), SCRF=(PCM,solvent=chloroform) (methods **M2**, and **M3**).

| Carbon     | $^{13}\text{C}$ NMR Chemical shifts [ppm] |       |       |       |                           |                           |                           |
|------------|-------------------------------------------|-------|-------|-------|---------------------------|---------------------------|---------------------------|
|            | Exp.                                      | M1    | M2    | M3    | $\Delta_{\text{M1-Exp.}}$ | $\Delta_{\text{M2-Exp.}}$ | $\Delta_{\text{M3-Exp.}}$ |
| <b>1</b>   | 58.8                                      | 60.9  | 59.8  | 59.7  | 2.1                       | 1.0                       | 0.9                       |
| <b>3</b>   | 57                                        | 59.2  | 57.8  | 57.6  | 2.2                       | 0.8                       | 0.6                       |
| <b>4</b>   | 25.8                                      | 27.8  | 27    | 26.7  | 2.0                       | 1.2                       | 0.9                       |
| <b>4a</b>  | 109.1                                     | 109   | 108.4 | 108.4 | -0.1                      | -0.7                      | -0.7                      |
| <b>4b</b>  | 127.2                                     | 127.9 | 127.1 | 127.1 | 0.7                       | -0.1                      | -0.1                      |
| <b>5</b>   | 118.4                                     | 117   | 117.7 | 117.6 | -1.4                      | -0.7                      | -0.8                      |
| <b>6</b>   | 119.8                                     | 118.3 | 118.6 | 118.5 | -1.5                      | -1.2                      | -1.3                      |
| <b>7</b>   | 122.1                                     | 120   | 120.4 | 120.4 | -2.1                      | -1.7                      | -1.7                      |
| <b>8</b>   | 111.1                                     | 108.9 | 109.5 | 109.5 | -2.2                      | -1.6                      | -1.6                      |
| <b>8a</b>  | 136.3                                     | 135.3 | 134.6 | 134.6 | -1.0                      | -1.7                      | -1.7                      |
| <b>9a</b>  | 134.8                                     | 135.8 | 135.3 | 135.2 | 1.0                       | 0.5                       | 0.4                       |
| <b>1'</b>  | 140.8                                     | 143.2 | 142.2 | 142.3 | 2.4                       | 1.4                       | 1.5                       |
| <b>2'</b>  | 128.8                                     | 128.7 | 128.8 | 128.7 | -0.1                      | 0.0                       | -0.1                      |
| <b>3'</b>  | 129.1                                     | 127.4 | 127.7 | 127.8 | -1.7                      | -1.4                      | -1.3                      |
| <b>4'</b>  | 128.8                                     | 127.6 | 128   | 128   | -1.2                      | -0.8                      | -0.8                      |
| <b>5'</b>  | 129.1                                     | 128.2 | 128.5 | 128.5 | -0.9                      | -0.6                      | -0.6                      |
| <b>6'</b>  | 128.8                                     | 127.7 | 128.1 | 128.1 | -1.1                      | -0.7                      | -0.7                      |
| <b>1''</b> | 173.3                                     | 175.7 | 175.1 | 175.1 | 2.4                       | 1.8                       | 1.8                       |
| <b>2''</b> | 52.4                                      | 51.5  | 51.5  | 51.5  | -0.9                      | -0.9                      | -0.9                      |

Methods used for determination of conformer energies:

M1 – B3LYP/6-311+G(2d,p)//B3LYP/6-31G(d), SCRF=(PCM,solvent=chloroform),

M2 – mPW1PW91/6-311+G(2d,p)//B3LYP/6-31G(d), SCRF=(PCM,solvent=chloroform)

M3 – M06-2X/def2-TZVP//B3LYP/6-31G(d), SCRF=(PCM,solvent=chloroform)

**Table S21.** Predicted  $^{13}\text{C}$  NMR shifts in C-1 and C-3 for conformers of compound **7a**, grouped according to conformer ensembles B and C.

|          |                            | Ensemble B |      |      |      |       |       |       |       | Weighted average |
|----------|----------------------------|------------|------|------|------|-------|-------|-------|-------|------------------|
|          |                            | 7a-5       | 7a-6 | 7a-8 | 7a-9 | 7a-13 | 7a-14 | 7a-15 | 7a-16 |                  |
| Method 1 | Boltzmann distribution [%] | 26.3       | 12.6 | 22.6 | 10.5 | 0.6   | 0.5   | 0.2   | 0.2   | –                |
|          | $\delta$ C1 [ppm]          | 52.4       | 54.6 | 54.3 | 53.0 | 57.3  | 59.9  | 60.3  | 57.7  | 53.6             |
|          | $\delta$ C3 [ppm]          | 52.8       | 52.5 | 52.4 | 55.7 | 55.3  | 54.8  | 55.9  | 58.2  | 53.1             |
| Method 2 | Boltzmann distribution [%] | 23.7       | 12.7 | 26.1 | 9.2  | 0.5   | 0.5   | 0.2   | 0.2   | –                |
|          | $\delta$ C1 [ppm]          | 51.5       | 53.8 | 53.5 | 52.2 | 56.3  | 58.7  | 59.1  | 56.7  | 52.8             |
|          | $\delta$ C3 [ppm]          | 51.6       | 51.6 | 51.5 | 54.3 | 54.2  | 53.8  | 54.9  | 56.8  | 52.0             |
| Method 3 | Boltzmann distribution [%] | 15.9       | 13.7 | 24.9 | 7.2  | 0.4   | 0.4   | 0.2   | 0.1   | –                |
|          | $\delta$ C1 [ppm]          | 51.5       | 53.8 | 53.5 | 52.2 | 56.3  | 58.7  | 59.1  | 56.7  | 53.0             |
|          | $\delta$ C3 [ppm]          | 51.6       | 51.6 | 51.5 | 54.3 | 54.2  | 53.8  | 54.9  | 56.8  | 51.9             |
|          |                            | Ensemble C |      |      |      |       |       |       |       | Weighted average |
|          |                            | 7a-1       | 7a-2 | 7a-3 | 7a-4 | 7a-7  | 7a-10 | 7a-11 | 7a-12 |                  |
| Method 1 | Boltzmann distribution [%] | 9.9        | 7.2  | 3.0  | 0.8  | 2.1   | 0.4   | 1.3   | 1.6   | –                |
|          | $\delta$ C1 [ppm]          | 52.1       | 53.1 | 58.2 | 57.7 | 53.2  | 58.8  | 59.4  | 53.1  | 53.8             |
|          | $\delta$ C3 [ppm]          | 58.3       | 58.8 | 58.0 | 57.3 | 57.3  | 59.1  | 58.7  | 58.8  | 58.3             |
| Method 2 | Boltzmann distribution [%] | 10.2       | 7.2  | 3.2  | 0.8  | 2.1   | 0.4   | 1.3   | 1.8   | –                |
|          | $\delta$ C1 [ppm]          | 51.4       | 52.4 | 57.2 | 56.6 | 52.4  | 57.7  | 58.3  | 52.3  | 53.1             |
|          | $\delta$ C3 [ppm]          | 57.1       | 57.7 | 56.9 | 56.1 | 56.1  | 57.8  | 57.6  | 57.6  | 57.2             |
| Method 3 | Boltzmann distribution [%] | 14.4       | 8.4  | 5.9  | 1.2  | 2.7   | 0.5   | 2.1   | 1.9   | –                |
|          | $\delta$ C1 [ppm]          | 51.4       | 52.4 | 57.2 | 56.6 | 52.4  | 57.7  | 58.3  | 52.3  | 53.3             |
|          | $\delta$ C3 [ppm]          | 57.1       | 57.7 | 56.9 | 56.1 | 56.1  | 57.8  | 57.6  | 57.6  | 57.2             |

Methods used for calculation of conformer energies: M1 – B3LYP/6-311+G(2d,p)//B3LYP/6-31G(d), SCRF(PCM=chloroform), M2 – mPW1PW91/6-311+G(2d,p)//B3LYP/6-31G(d), SCRF(PCM=chloroform), M3 – M06-2X/def2-TZVP//B3LYP/6-31G(d), SCRF(PCM=chloroform).  
 Methods used for  $^{13}\text{C}$  NMR shift calculation: M1 – B3LYP/6-311+G(2d,p)//B3LYP/6-31G(d), SCRF(PCM=chloroform), M2 and M3 – mPW1PW91/6-311+G(2d,p)//B3LYP/6-31G(d), SCRF(PCM=chloroform).

**Table S22.** Predicted  $^{13}\text{C}$  NMR shifts in C-1 and C-3 for calculated conformers of compound **7b**, grouped according to conformer ensemble B and C.

|                 |                            | <b>Ensemble B</b> |             |             |             | <b>Weighted average</b> |
|-----------------|----------------------------|-------------------|-------------|-------------|-------------|-------------------------|
|                 |                            | <b>7b-4</b>       | <b>7b-5</b> | <b>7b-6</b> | <b>7b-8</b> |                         |
| <b>Method 1</b> | Boltzmann distribution [%] | 8.7               | 20.6        | 22.1        | 9.7         | –                       |
|                 | $\delta$ C1 [ppm]          | 59.5              | 59.0        | 56.5        | 57.1        | 57.9                    |
|                 | $\delta$ C3 [ppm]          | 52.7              | 52.1        | 52.8        | 55.6        | 53.0                    |
| <b>Method 2</b> | Boltzmann distribution [%] | 8.0               | 22.1        | 21.2        | 8.9         | –                       |
|                 | $\delta$ C1 [ppm]          | 58.4              | 57.9        | 55.5        | 56.0        | 56.8                    |
|                 | $\delta$ C3 [ppm]          | 51.9              | 51.4        | 51.7        | 54.2        | 52.0                    |
| <b>Method 3</b> | Boltzmann distribution [%] | 7.5               | 19.6        | 18.5        | 8.8         | –                       |
|                 | $\delta$ C1 [ppm]          | 58.4              | 57.9        | 55.5        | 56.0        | 56.8                    |
|                 | $\delta$ C3 [ppm]          | 51.9              | 51.3        | 51.7        | 54.2        | 52.0                    |
|                 |                            | <b>Ensemble C</b> |             |             |             | <b>Weighted average</b> |
|                 |                            | <b>7b-1</b>       | <b>7b-2</b> | <b>7b-3</b> | <b>7b-7</b> |                         |
| <b>Method 1</b> | Boltzmann distribution [%] | 21.8              | 11.5        | 3.5         | 2.2         | –                       |
|                 | $\delta$ C1 [ppm]          | 56.9              | 57.7        | 56.6        | 56.7        | 57.1                    |
|                 | $\delta$ C3 [ppm]          | 58.0              | 58.8        | 57.3        | 58.7        | 58.2                    |
| <b>Method 2</b> | Boltzmann distribution [%] | 22.5              | 11.5        | 3.4         | 2.3         | –                       |
|                 | $\delta$ C1 [ppm]          | 56.0              | 56.7        | 55.6        | 55.8        | 56.2                    |
|                 | $\delta$ C3 [ppm]          | 56.8              | 57.7        | 56.1        | 57.6        | 57.0                    |
| <b>Method 3</b> | Boltzmann distribution [%] | 26.5              | 12.6        | 4.2         | 2.3         | –                       |
|                 | $\delta$ C1 [ppm]          | 56.0              | 56.7        | 55.6        | 55.8        | 56.1                    |
|                 | $\delta$ C3 [ppm]          | 56.8              | 57.7        | 56.1        | 57.6        | 57.0                    |

Methods used for calculation of conformer energies: M1 – B3LYP/6-311+G(2d,p)//B3LYP/6-31G(d), SCRF(PCM=chloroform), M2 – mPW1PW91/6-311+G(2d,p)//B3LYP/6-31G(d), SCRF(PCM=chloroform), M3 – M06-2X/def2-TZVP//B3LYP/6-31G(d), SCRF(PCM=chloroform).

Methods used for  $^{13}\text{C}$  NMR shift calculation: M1 – B3LYP/6-311+G(2d,p)//B3LYP/6-31G(d), SCRF(PCM=chloroform), M2 and M3 – mPW1PW91/6-311+G(2d,p)//B3LYP/6-31G(d), SCRF(PCM=chloroform).

Methyl (1*R*,3*S*)-1-butyl-2,3,4,9-tetrahydro-1*H*-pyrido[3,4-*b*]indole-3-carboxylate (**7aa**)

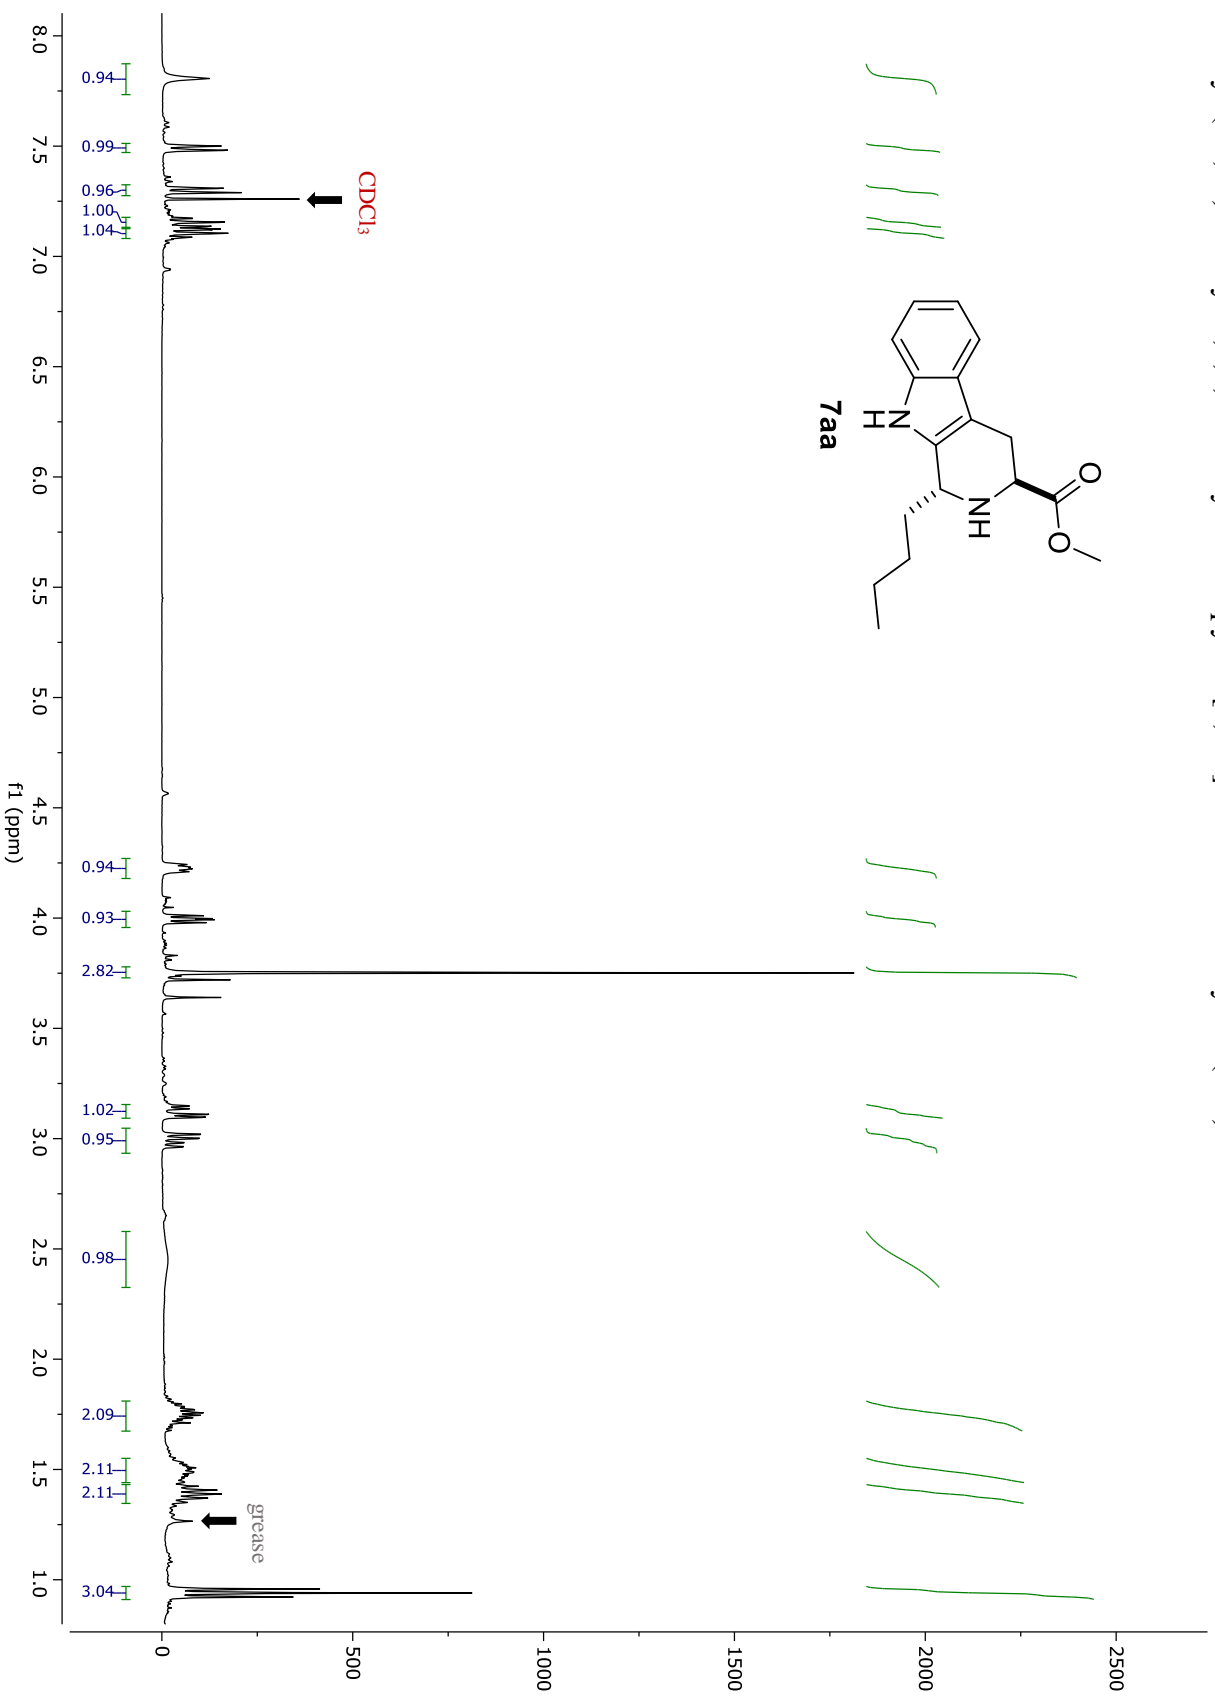

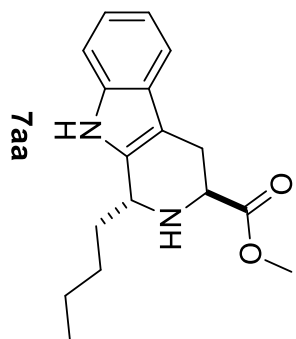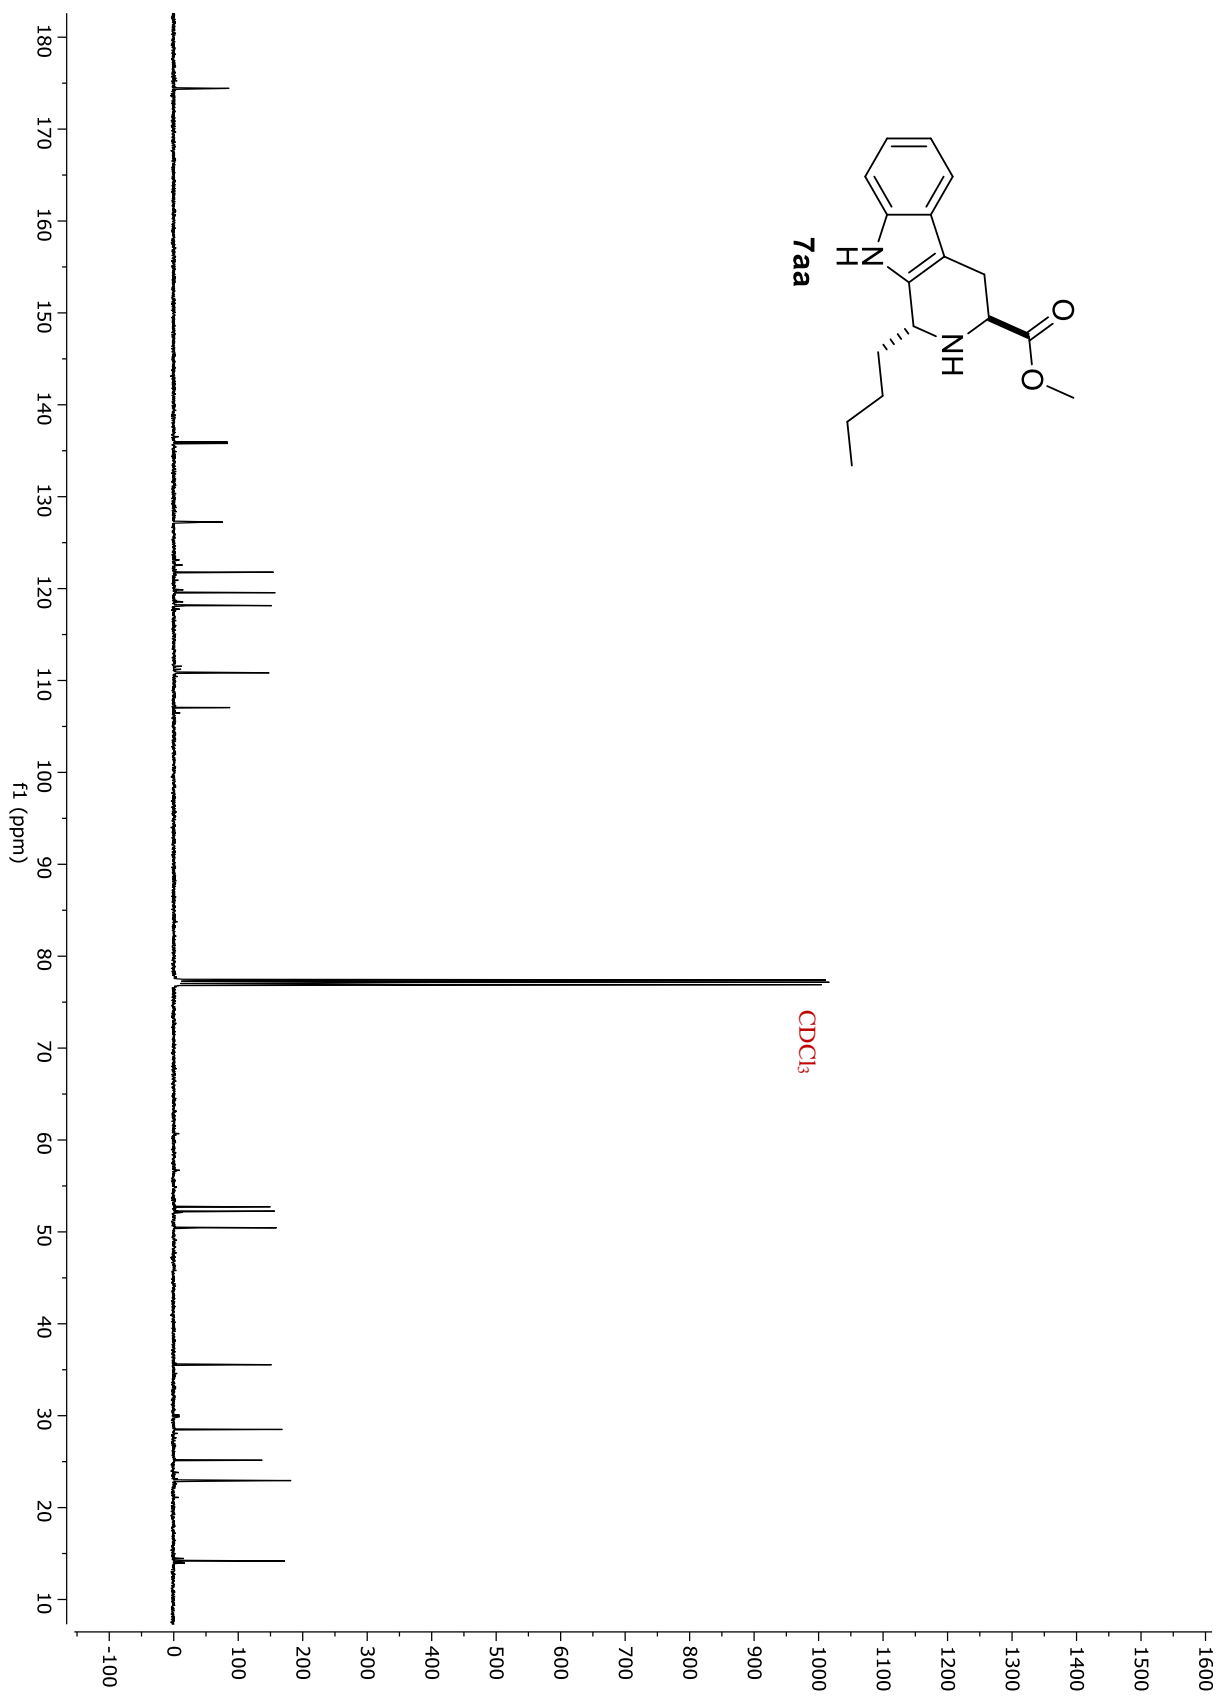

Methyl (1*S*,3*S*)-1-butyl-2,3,4,9-tetrahydro-1*H*-pyrido[3,4-*b*]indole-3-carboxylate (**8aa**)

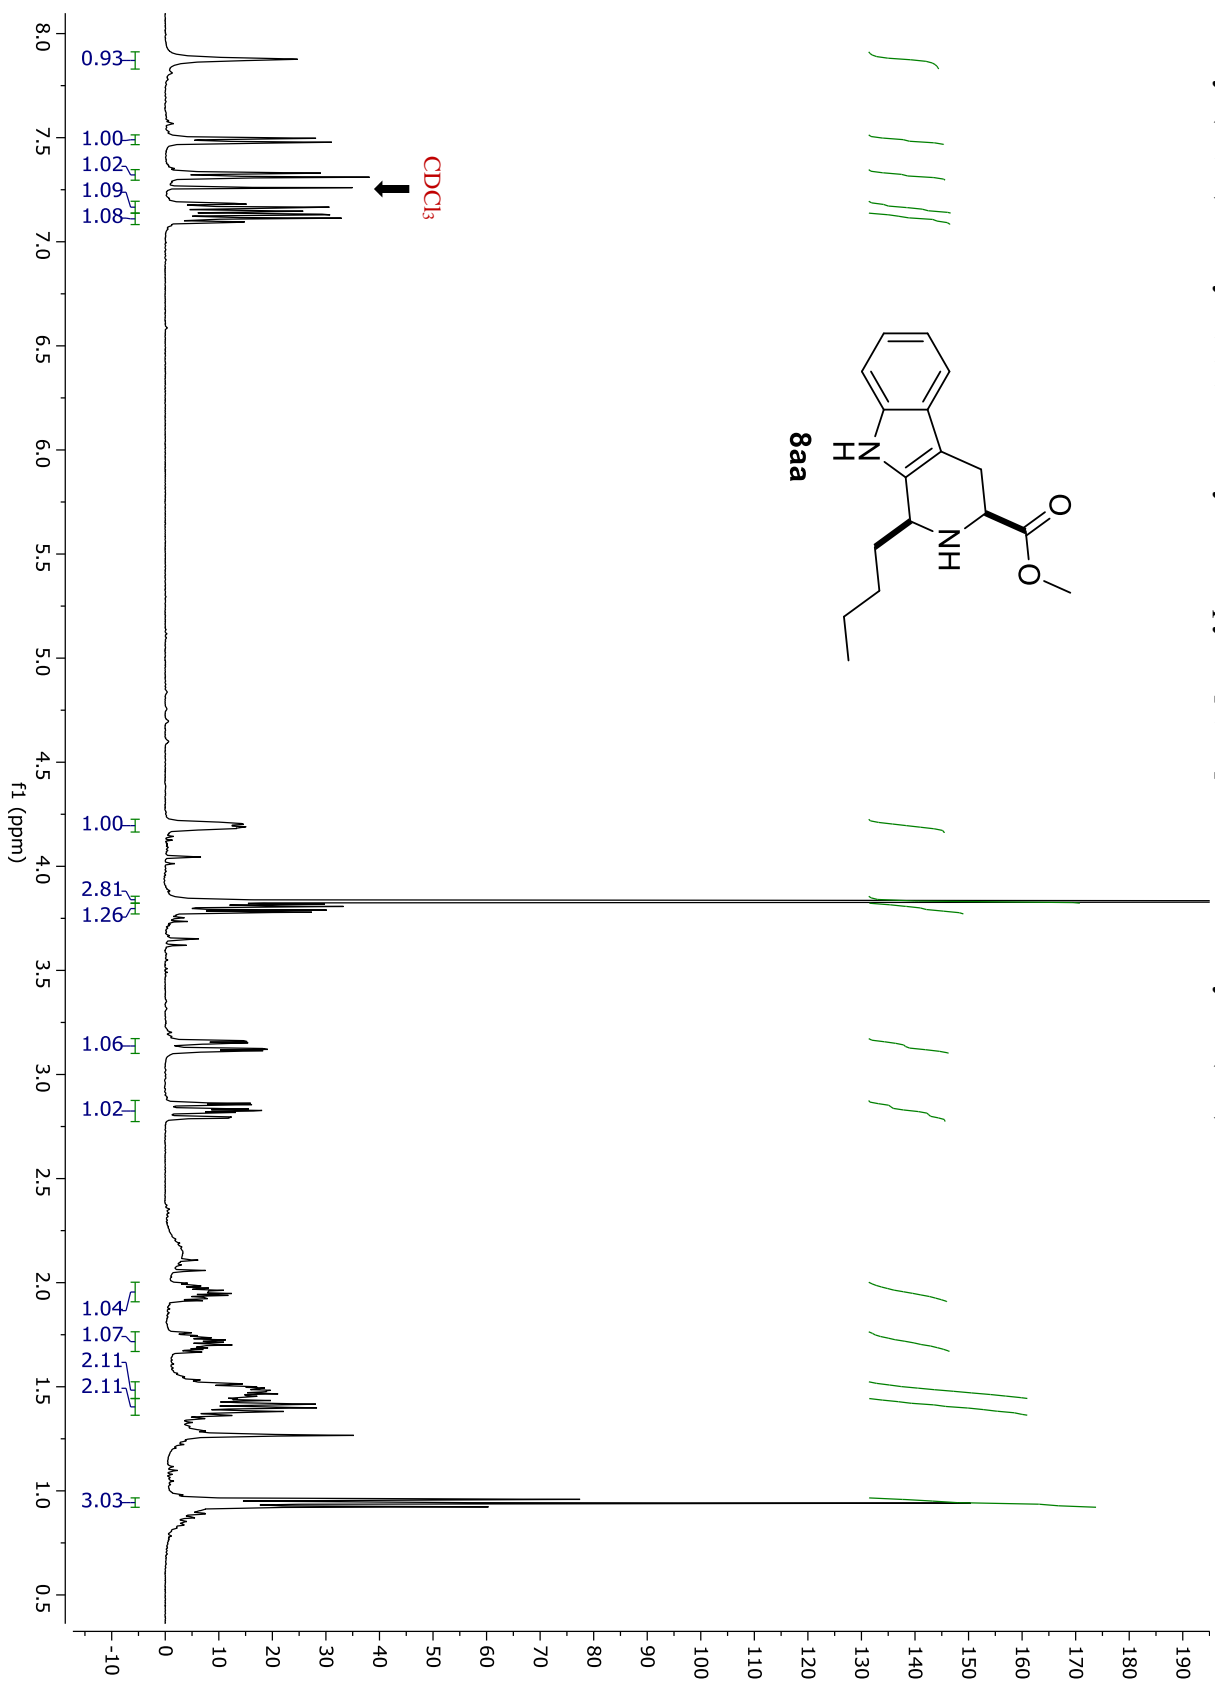

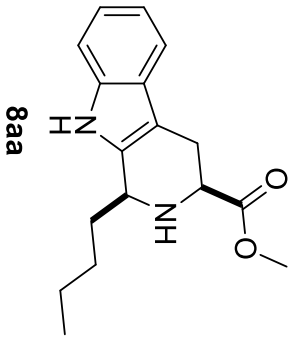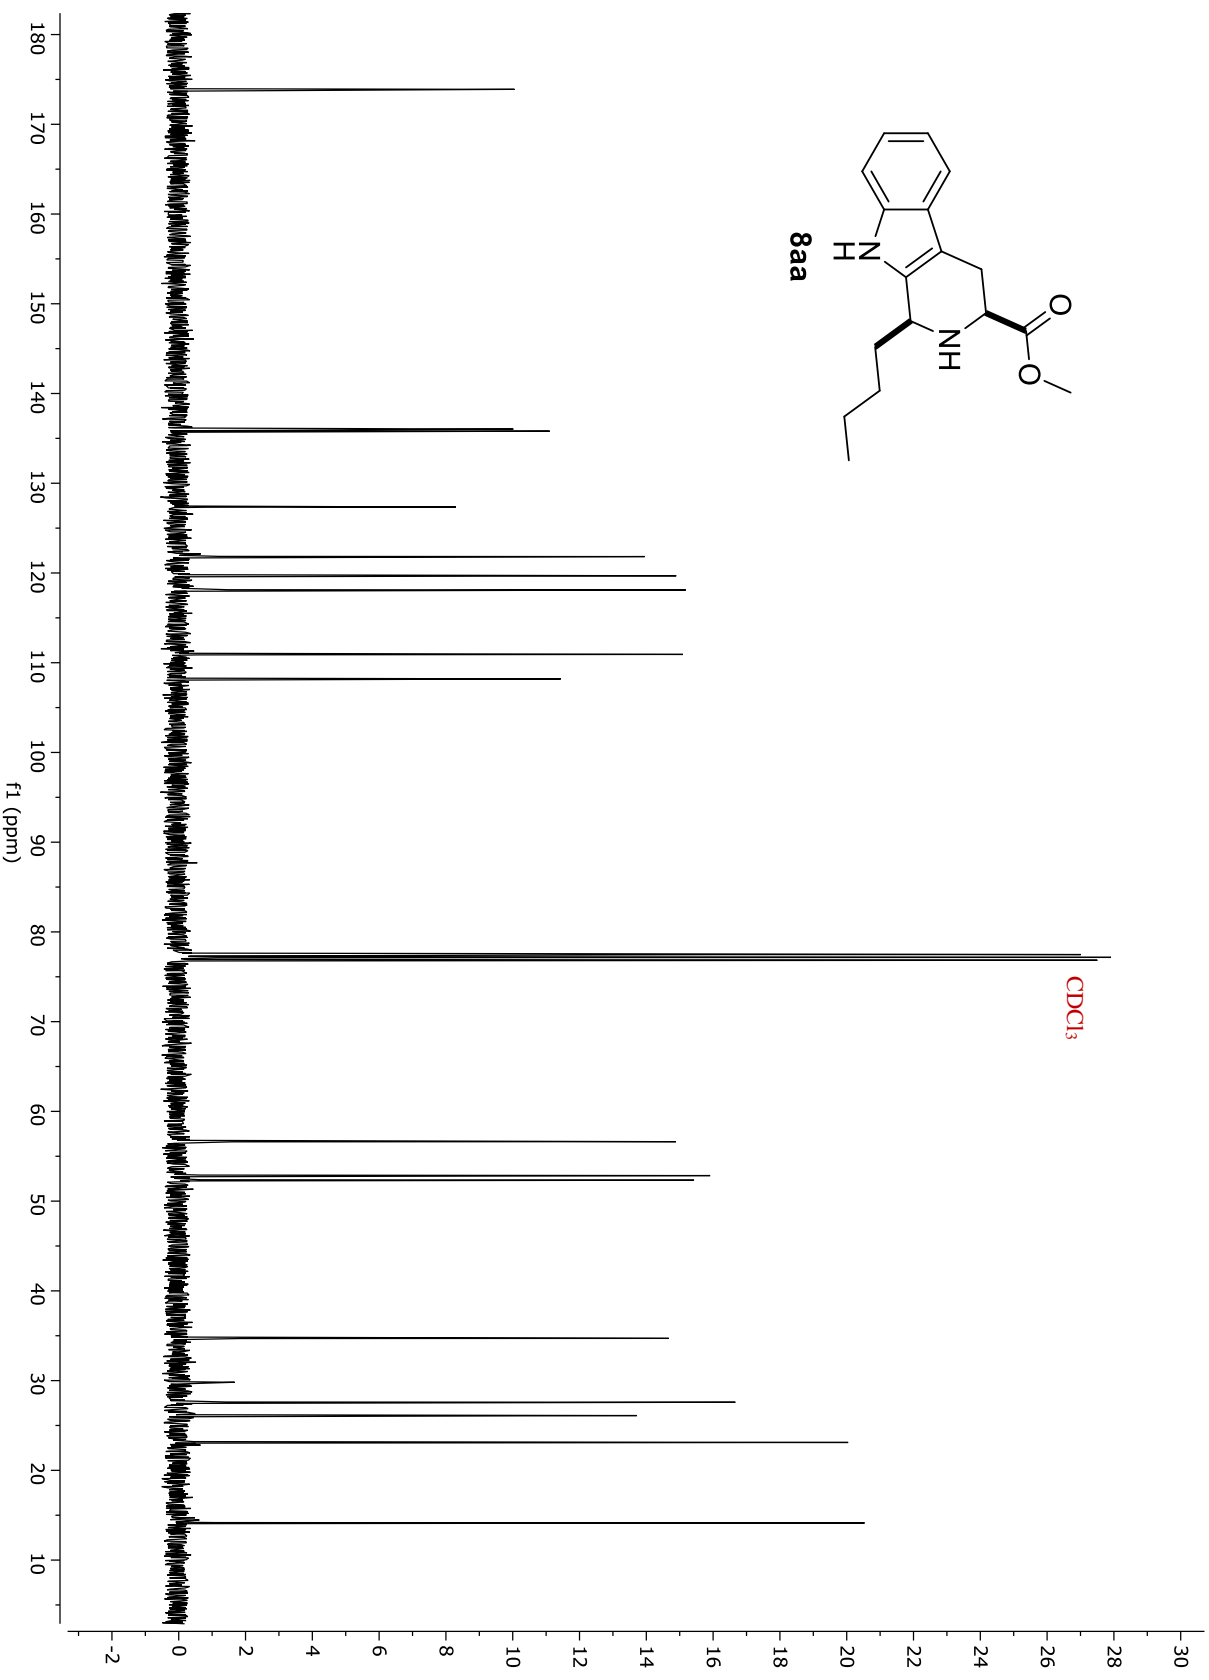



Methyl (1*R*,3*S*)-1-cyclohexyl-2,3,4,9-tetrahydro-1*H*-pyrido[3,4-*b*]indole-3-carboxylate (**7ab**)

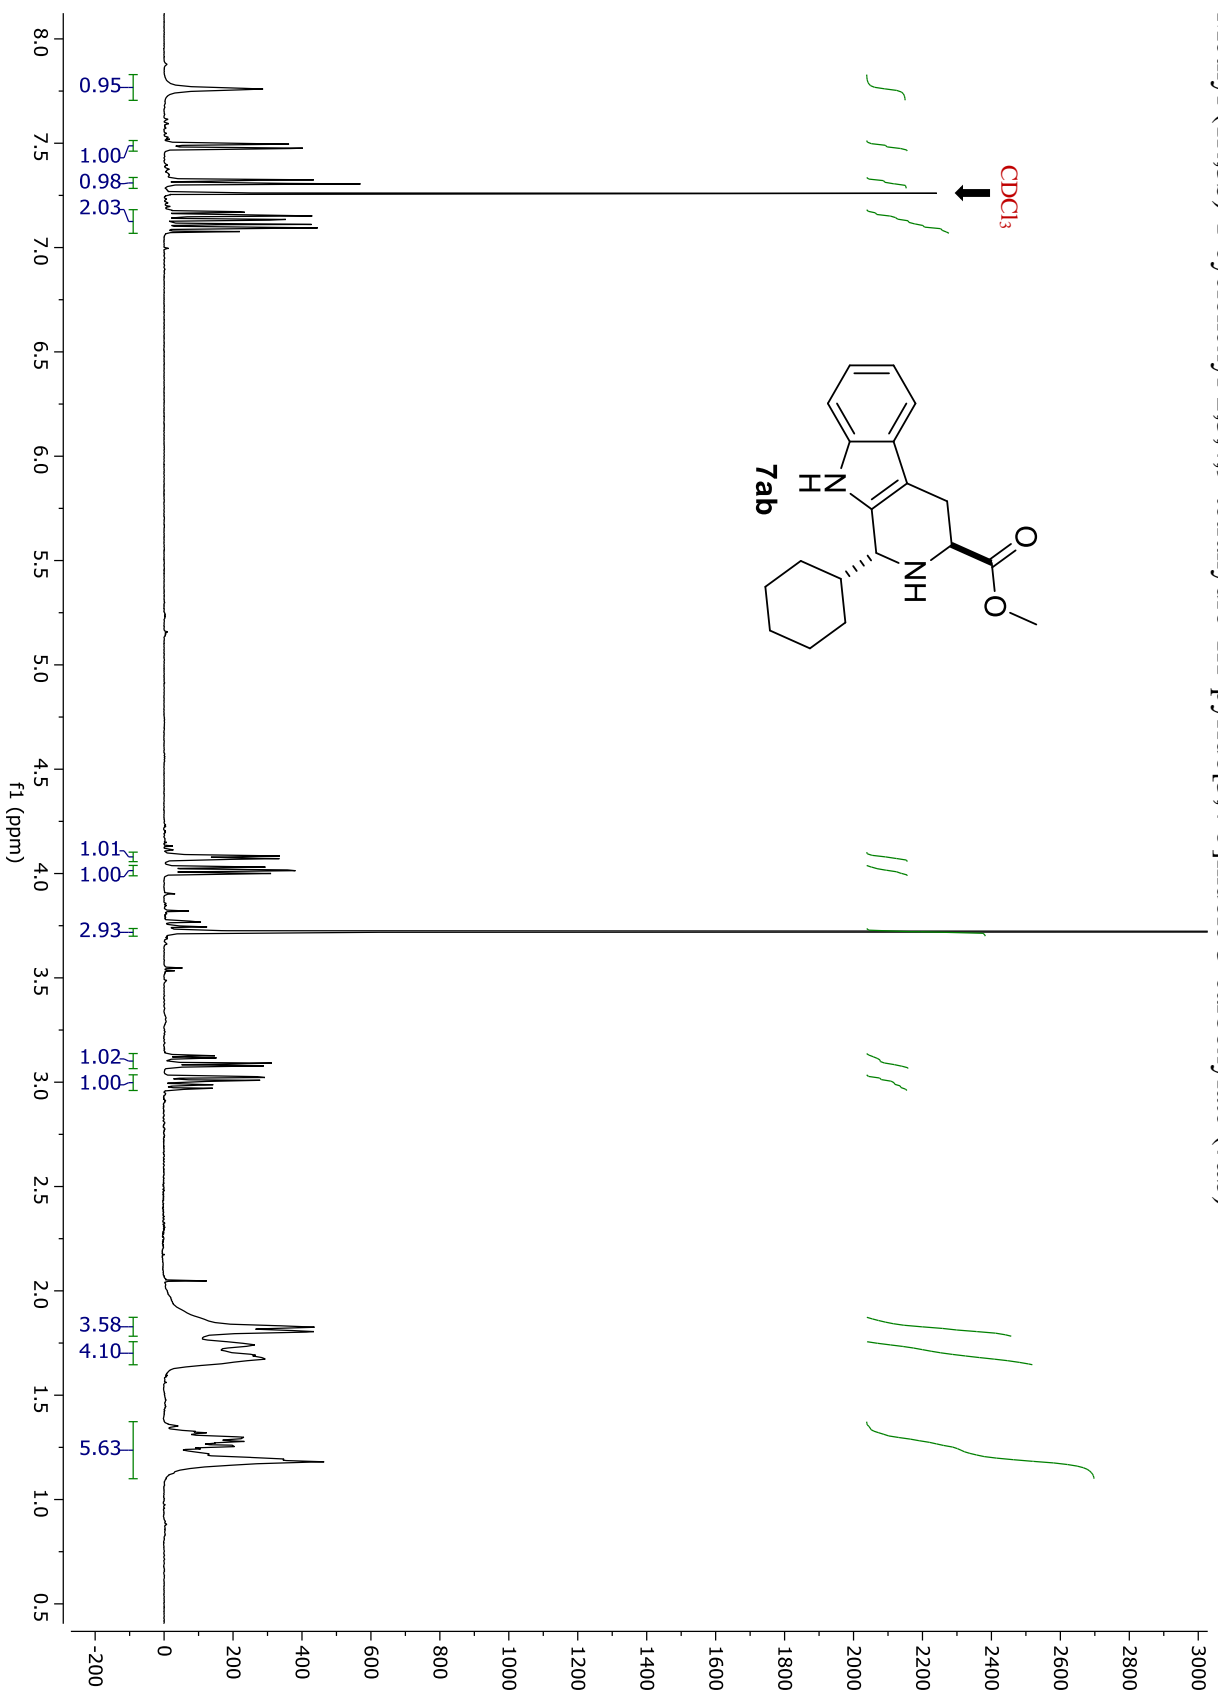

Methyl (1*S*,3*S*)-1-cyclohexyl-2,3,4,9-tetrahydro-1*H*-pyrido[3,4-*b*]indole-3-carboxylate (**8ab**)

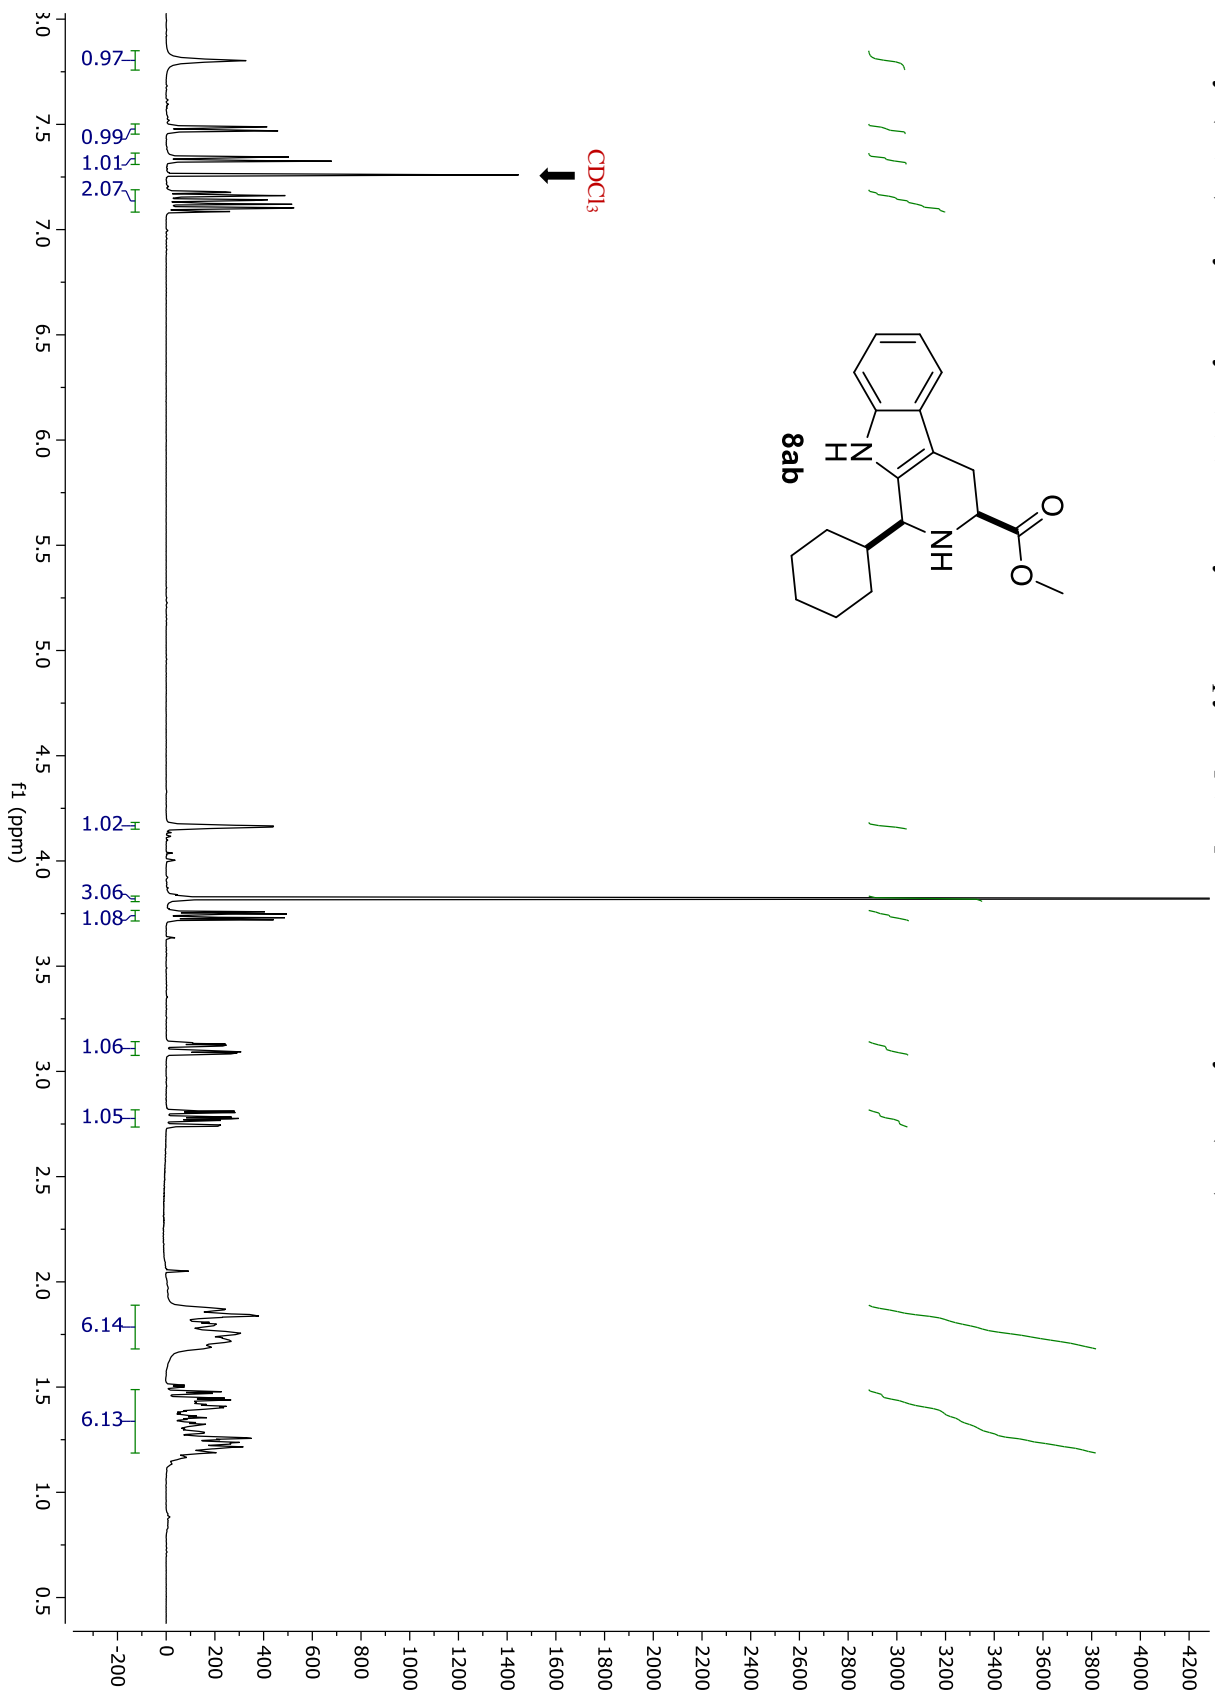

Methyl (1*R*,3*S*)-1-(pentan-3-yl)-2,3,4,9-tetrahydro-1*H*-pyrido[3,4-*b*]indole-3-carboxylate (**7ac**)

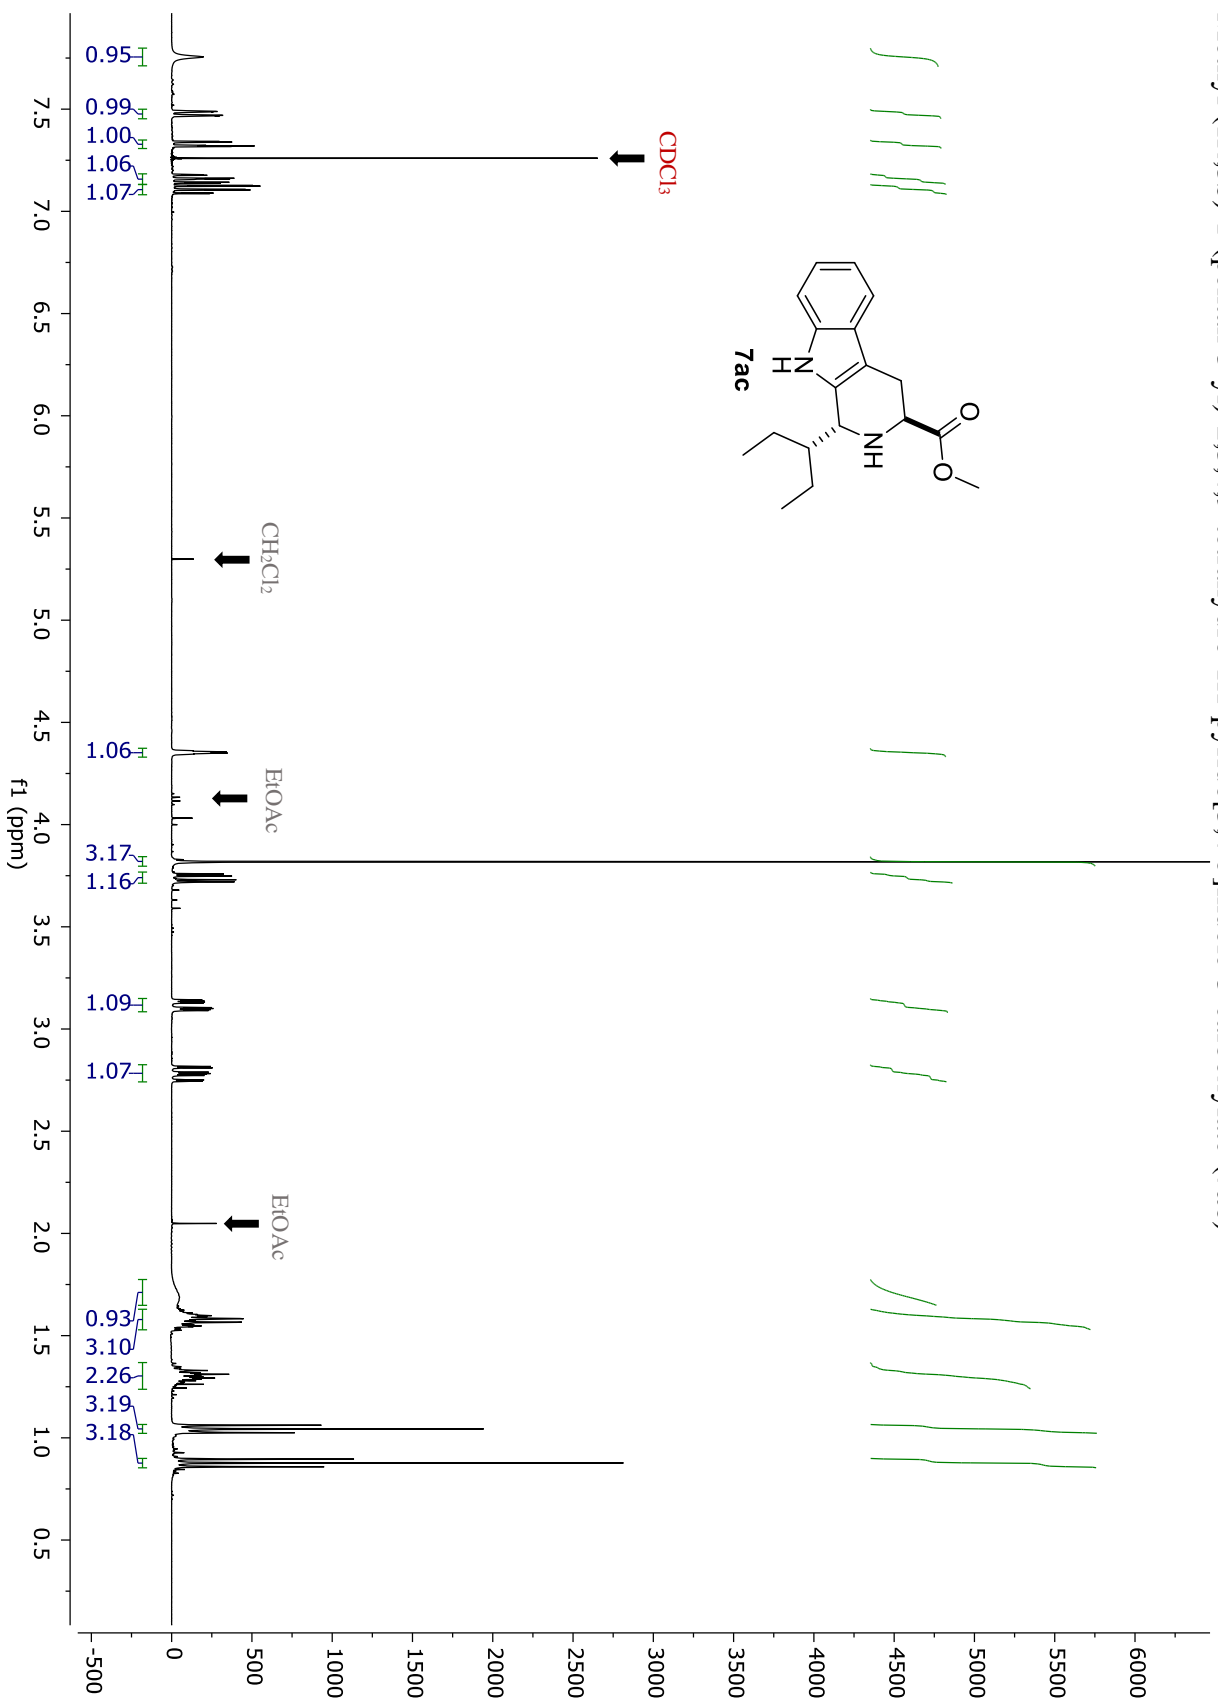



Methyl (1*S*,3*S*)-1-(pentan-3-yl)-2,3,4,9-tetrahydro-1*H*-pyrido[3,4-*b*]indole-3-carboxylate (**8ac**)

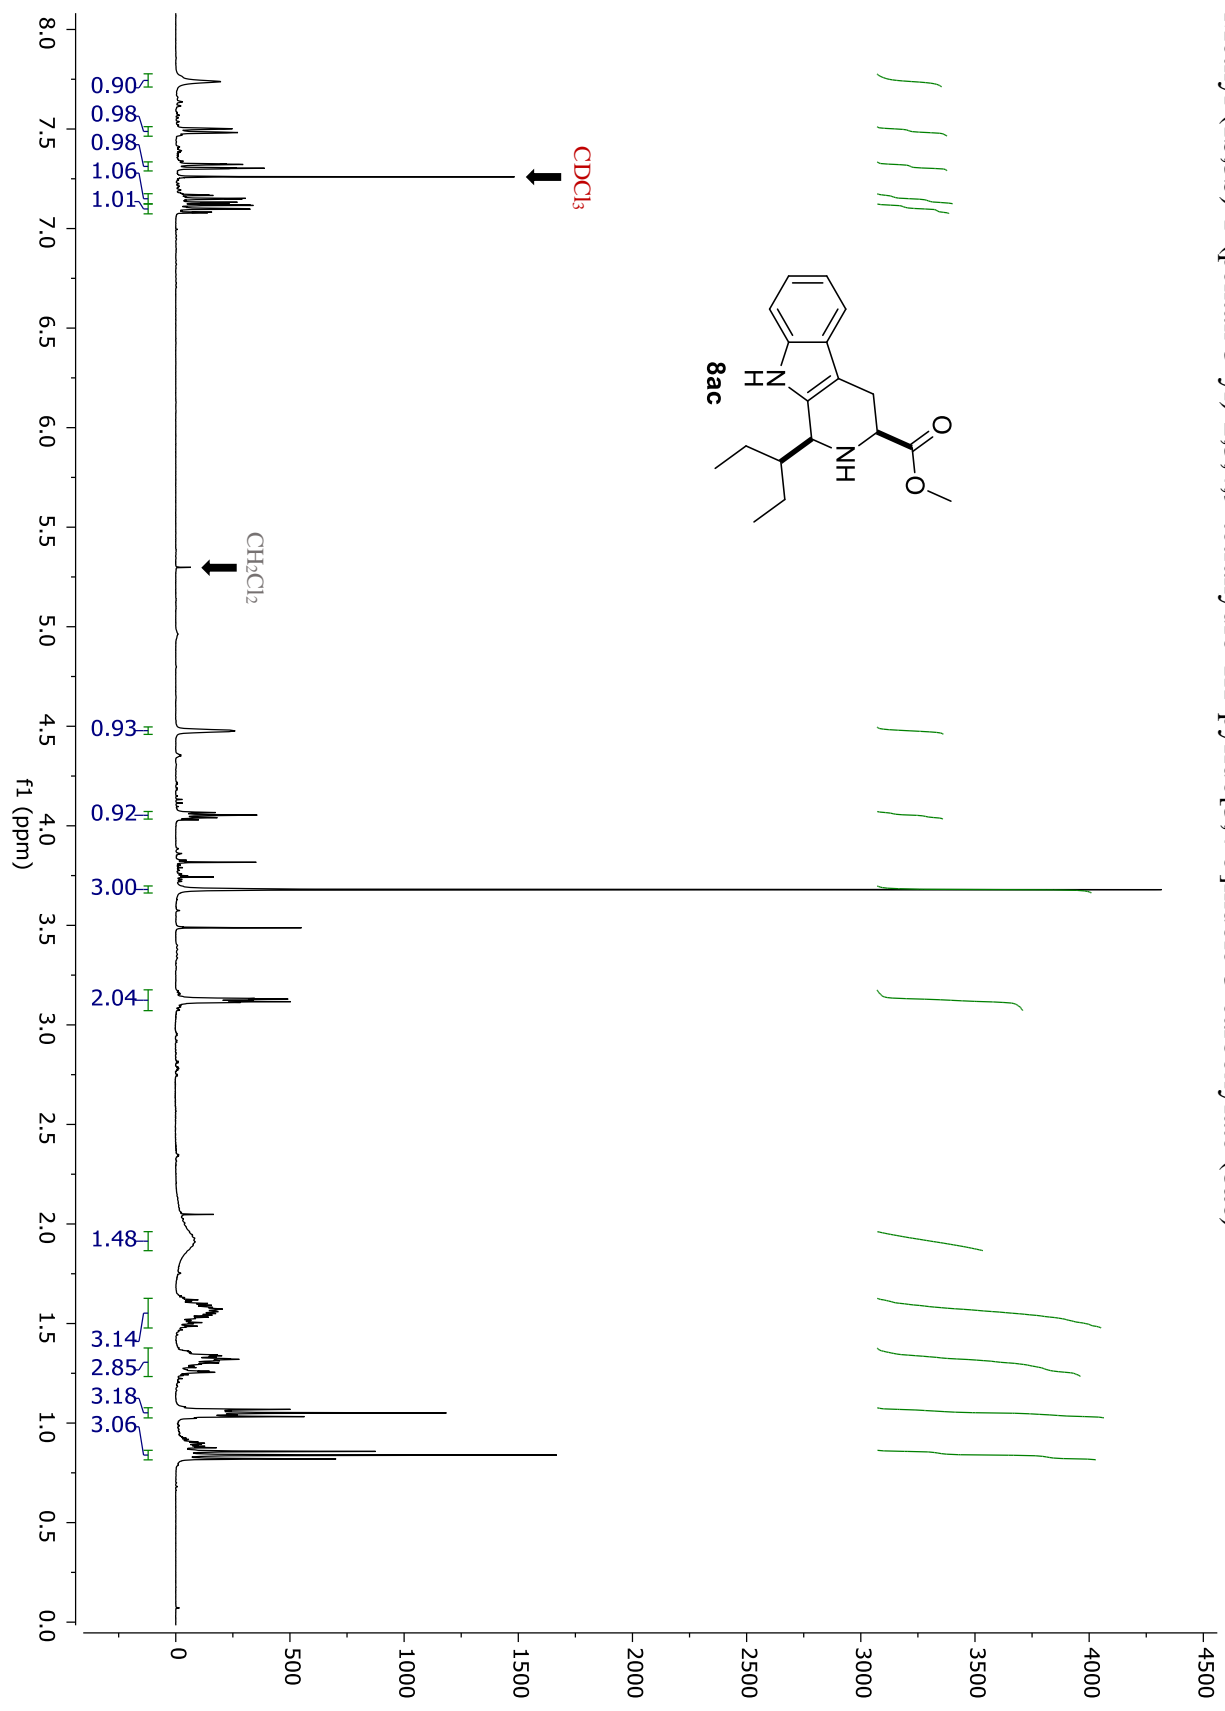

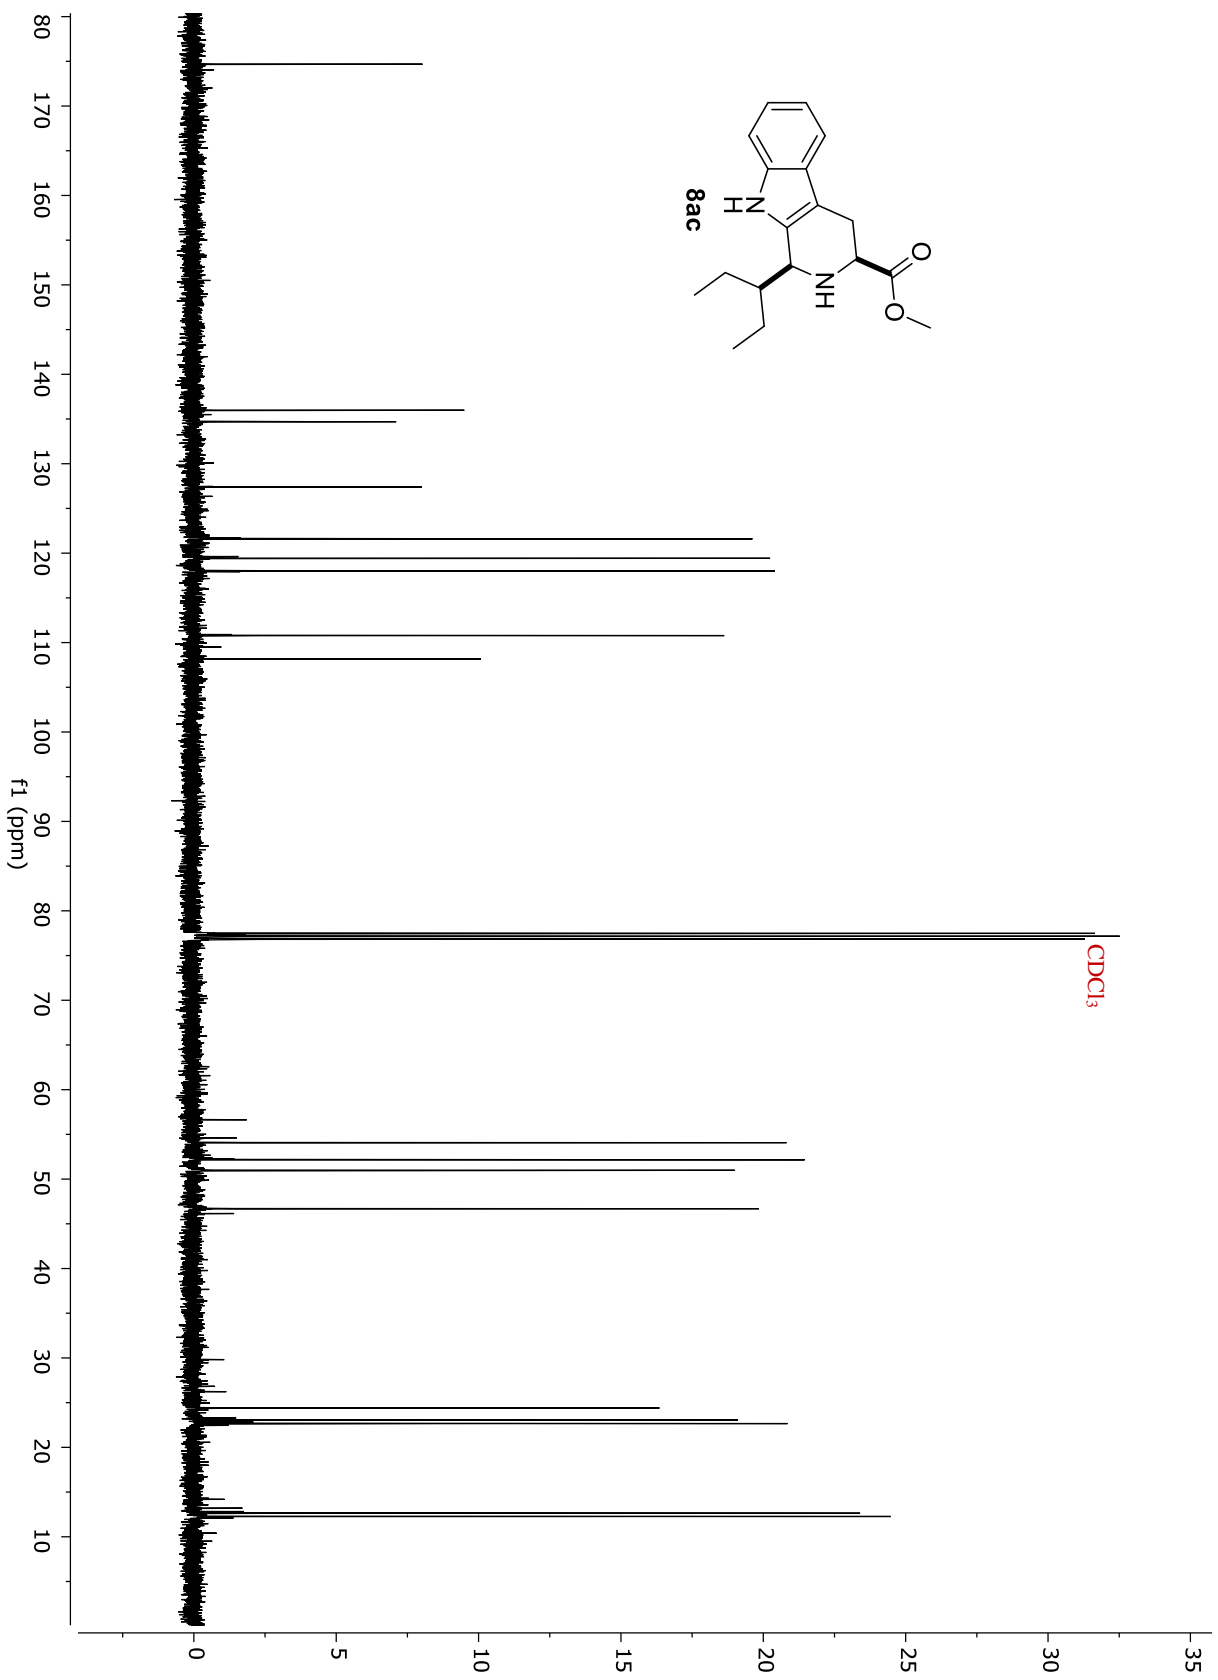

Methyl (1*R*,3*S*)-1-(*tert*-butyl)-2,3,4,9-tetrahydro-1*H*-pyrido[3,4-*b*]indole-3-carboxylate (**7ad**)

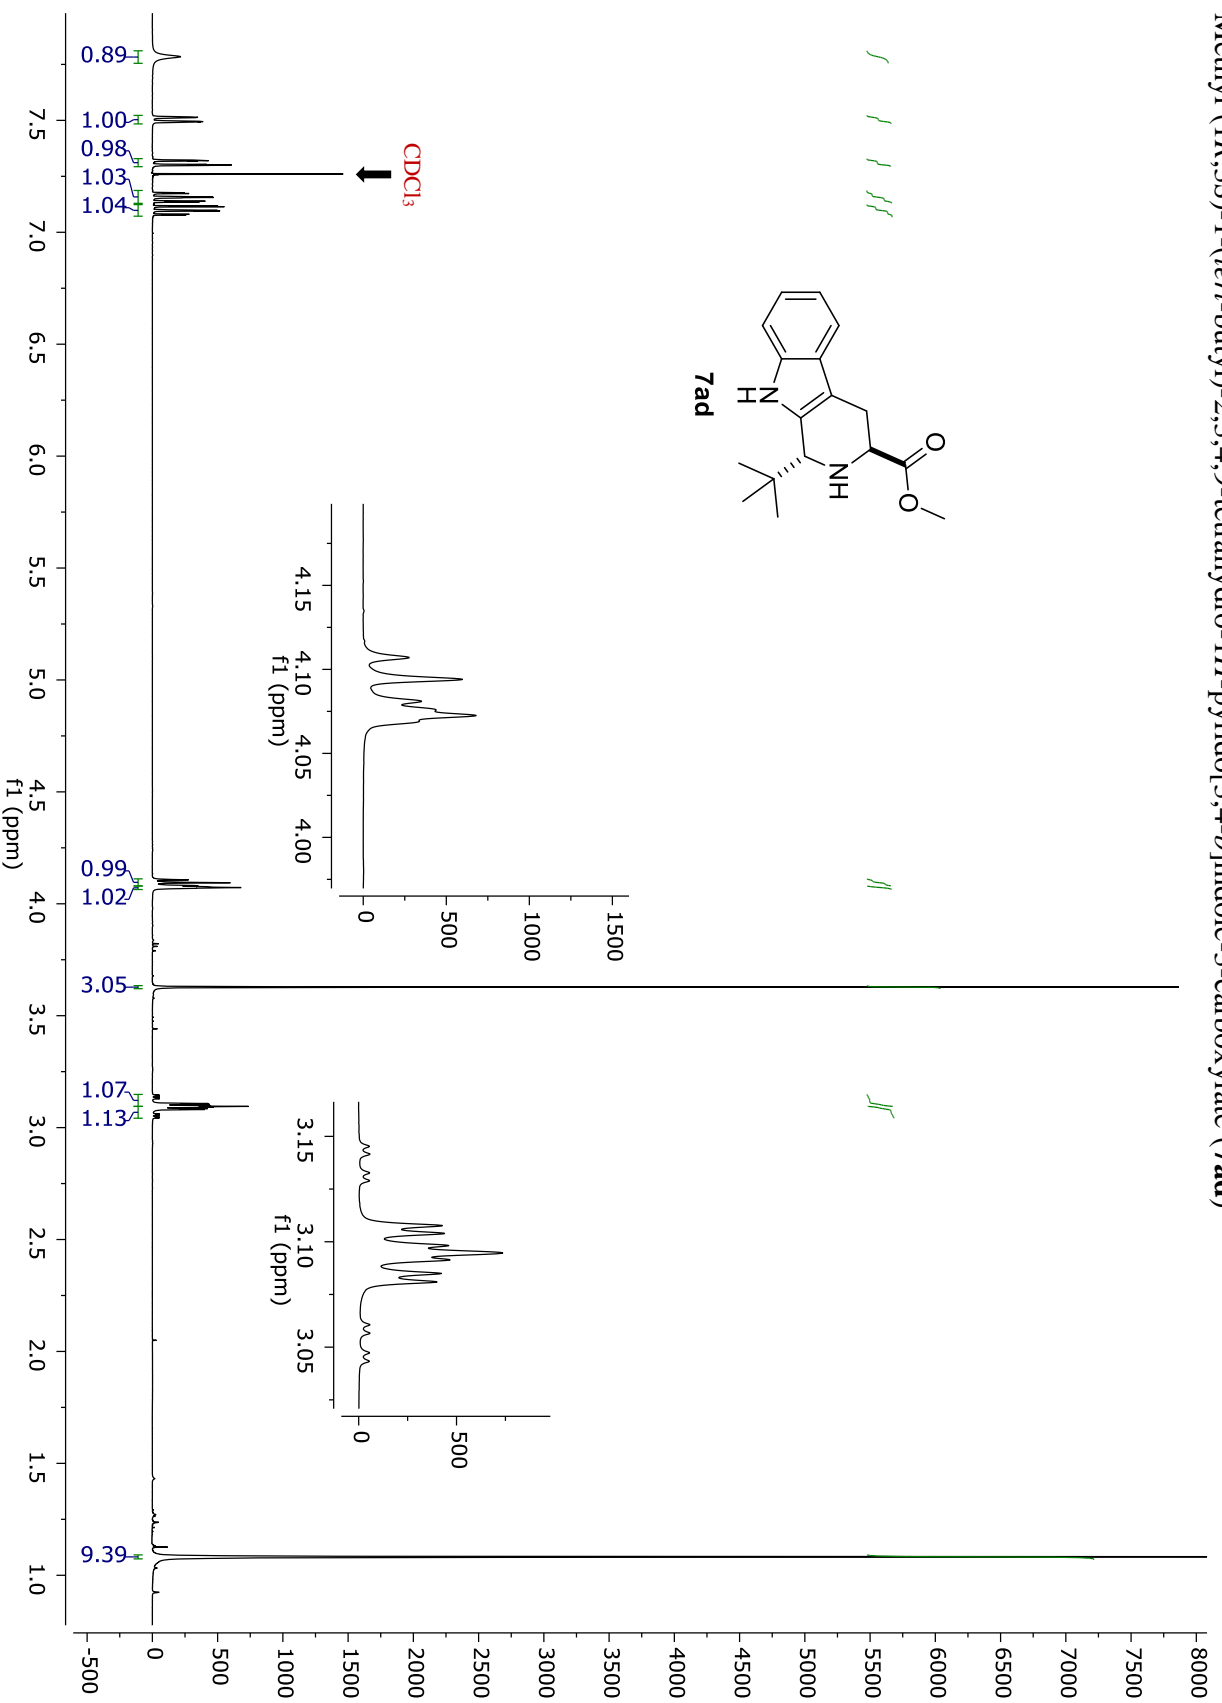

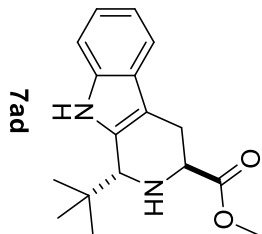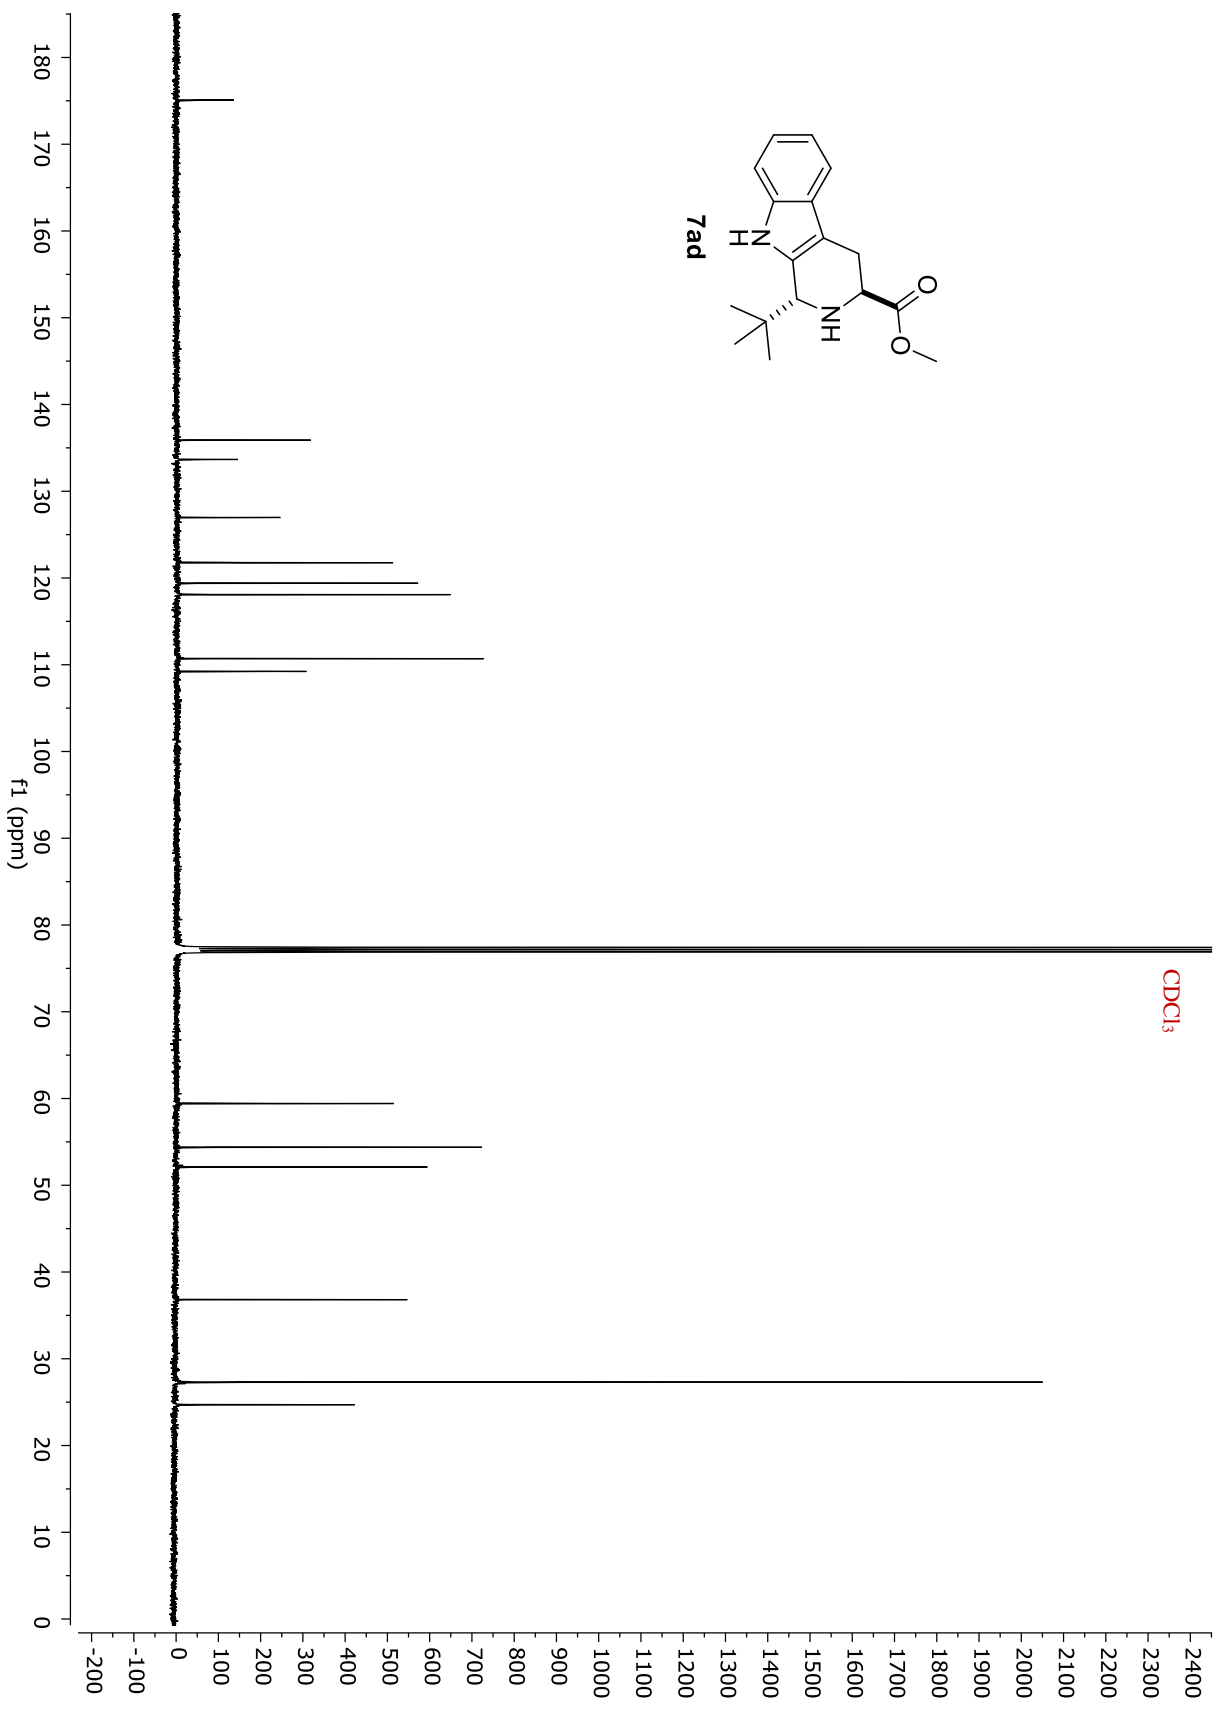



Methyl (1*S*,3*S*)-1-(*tert*-butyl)-2,3,4,9-tetrahydro-1*H*-pyrido[3,4-*b*]indole-3-carboxylate (**8ad**)

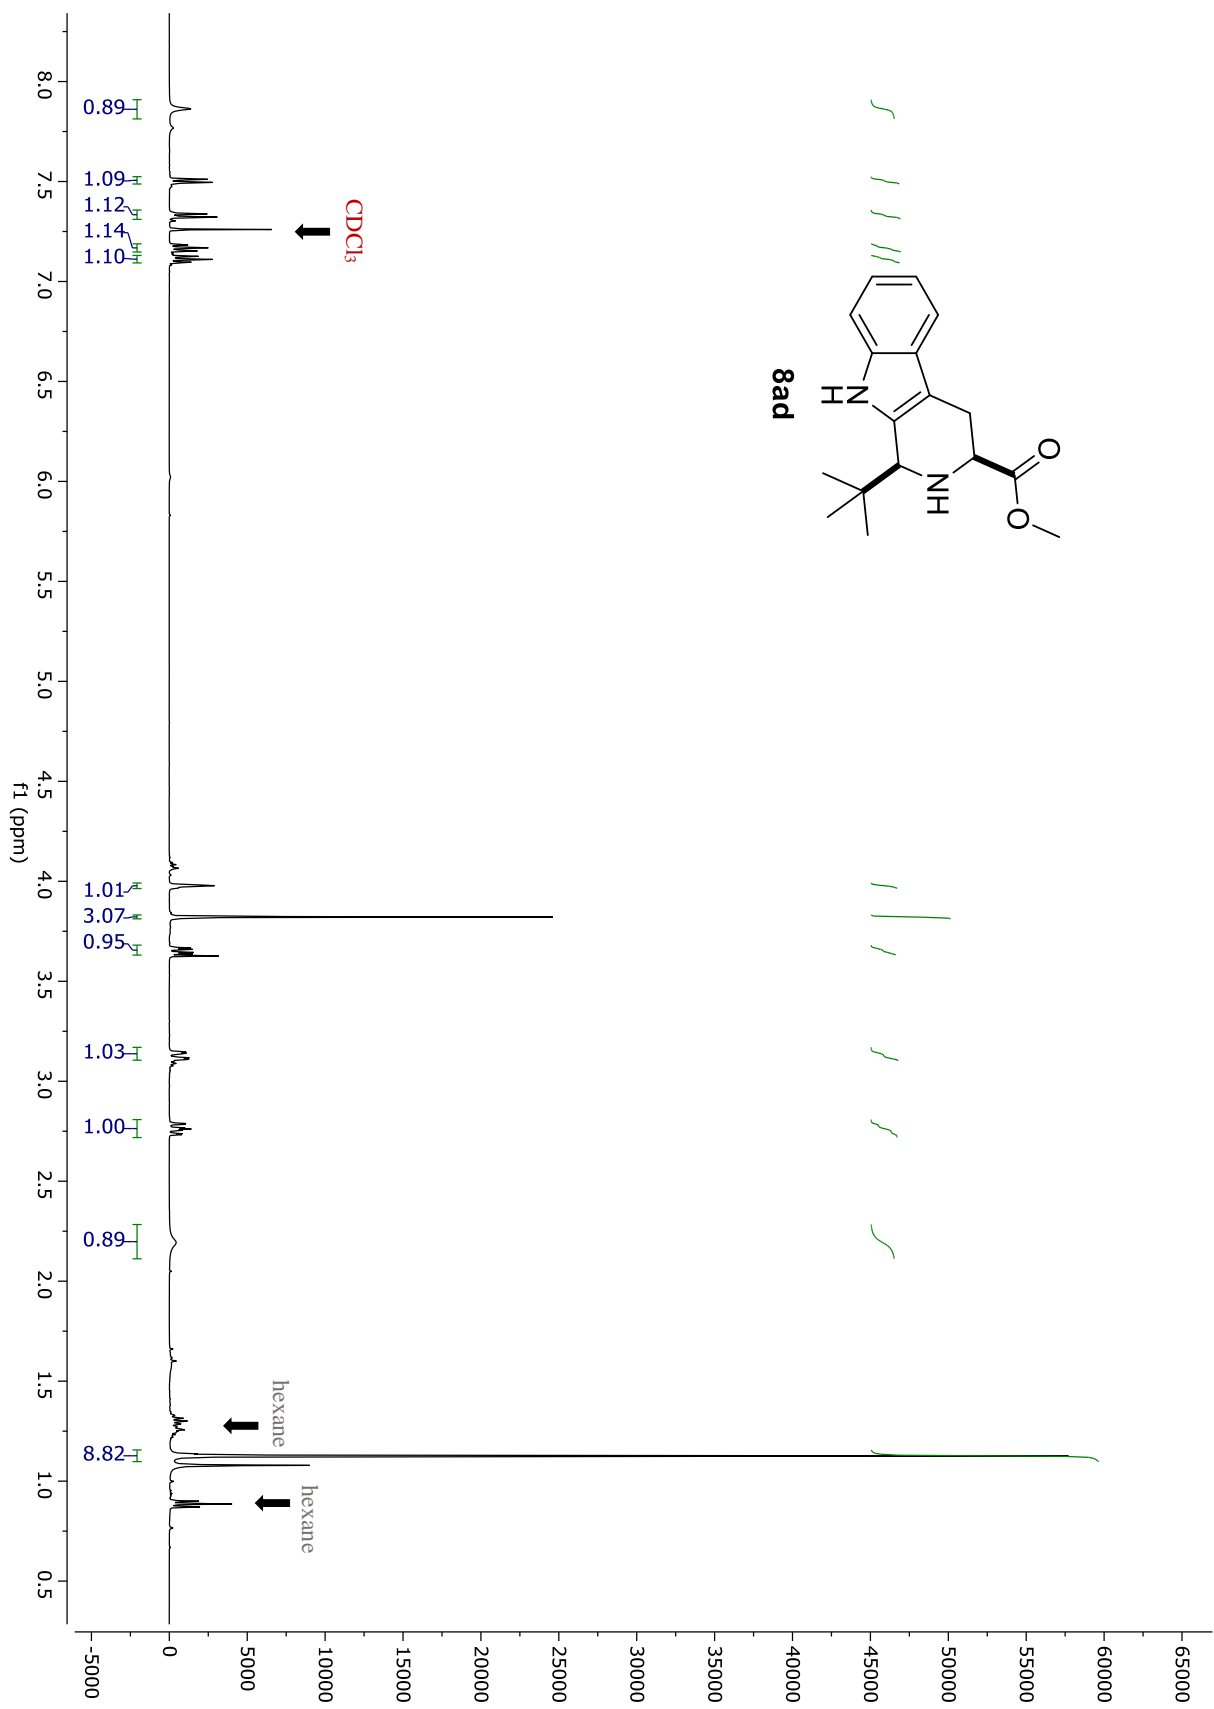

Methyl (1*R*,3*S*)-1-isobutyl-2,3,4,9-tetrahydro-1*H*-pyrido[3,4-*b*]indole-3-carboxylate (**7ae**)

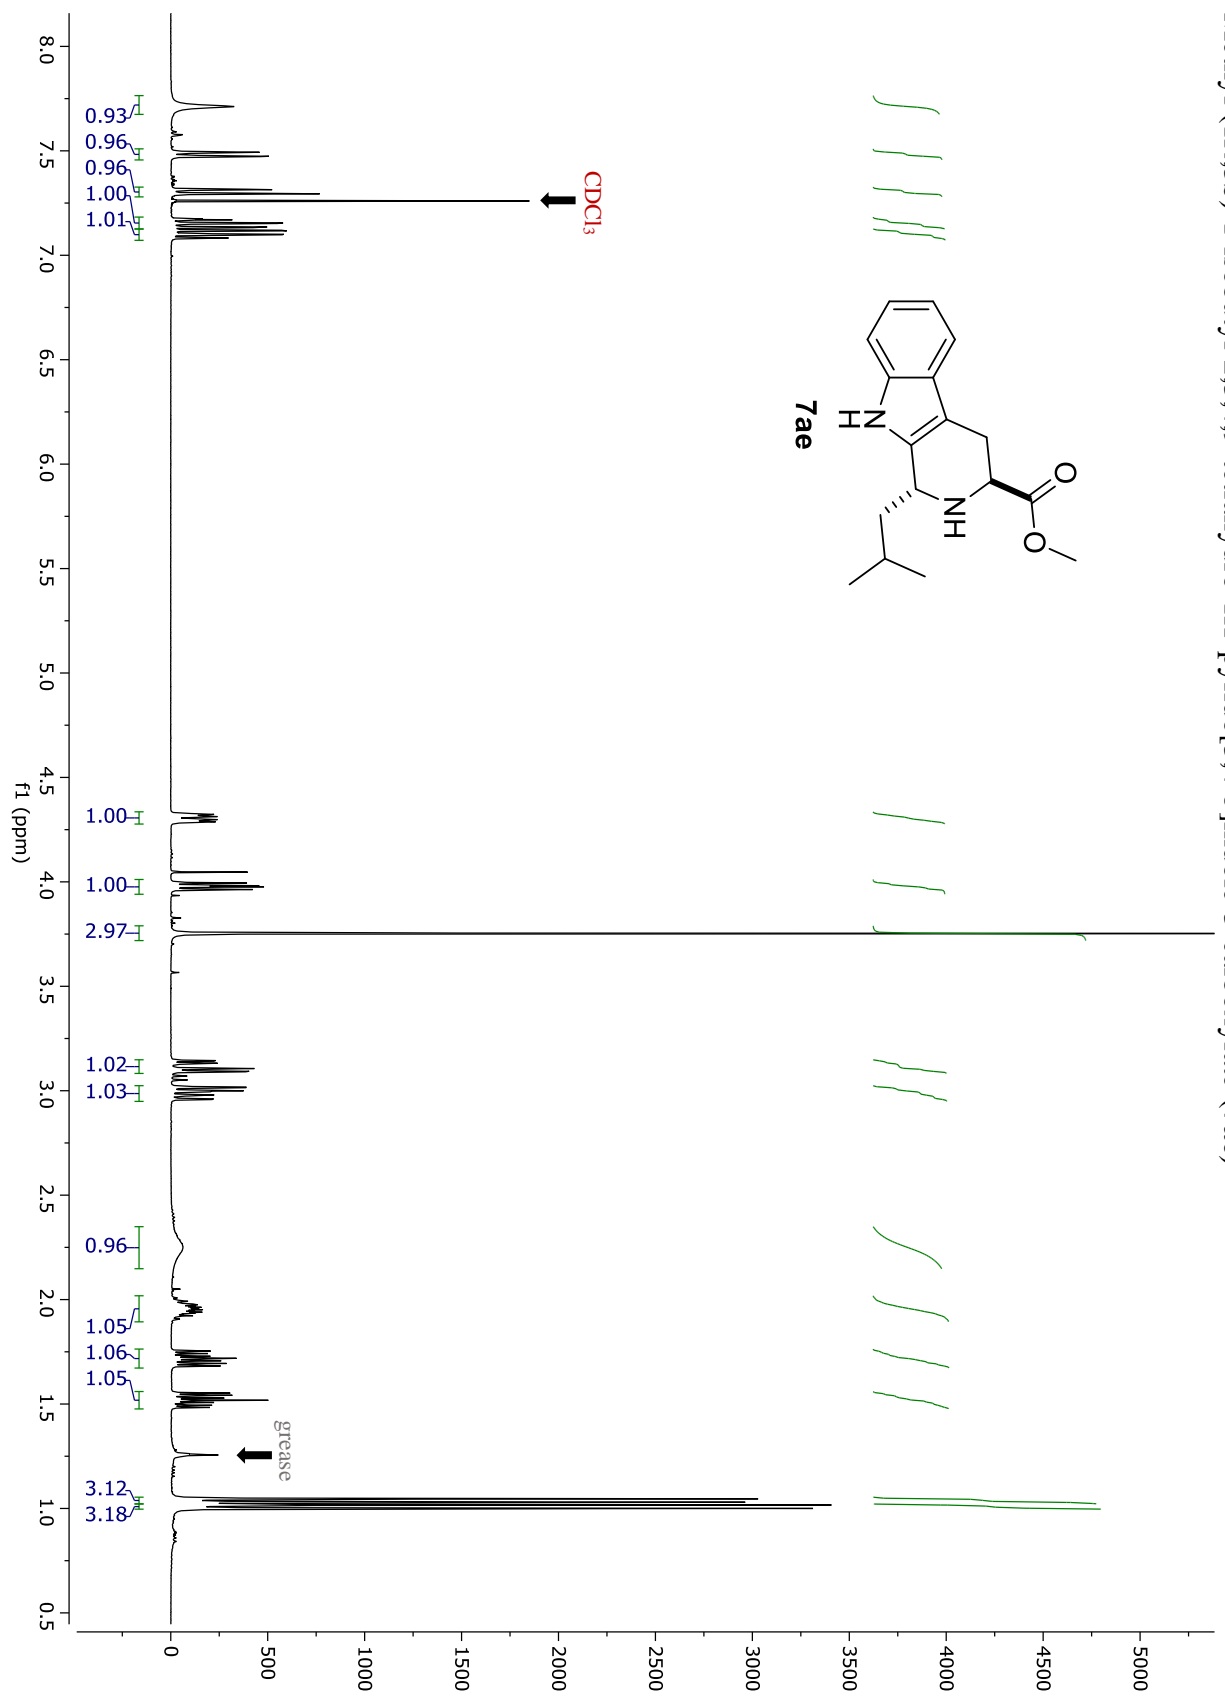

Methyl (1*R*,3*S*)-1-isobutyl-2,3,4,9-tetrahydro-1*H*-pyrido[3,4-*b*]indole-3-carboxylate (**8ae**)

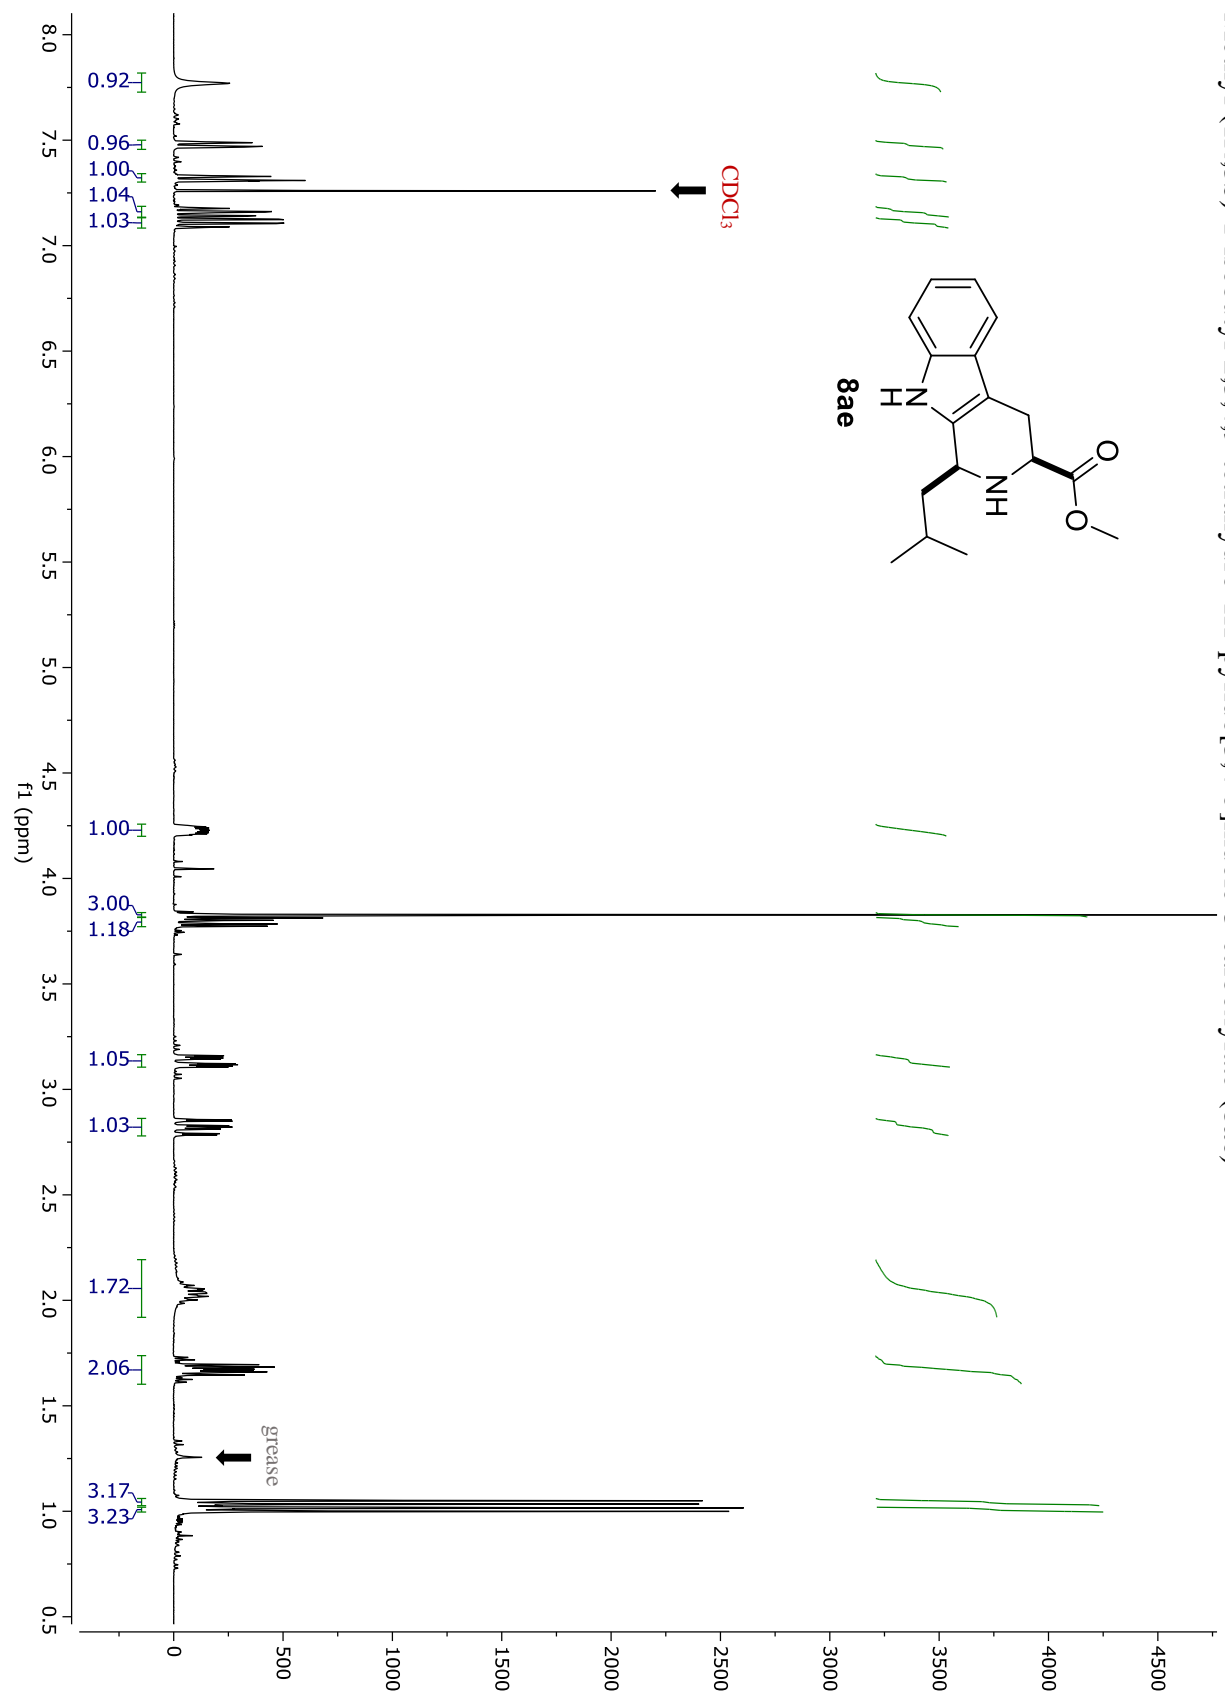

**7a-01**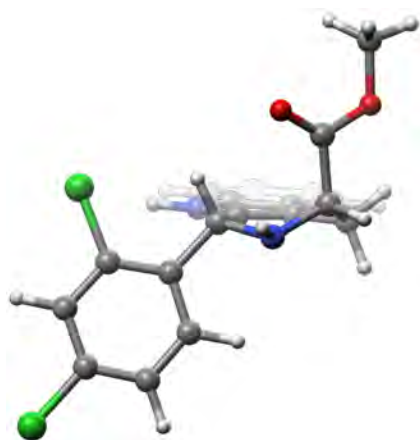

|   |             |             |             |    |             |             |             |
|---|-------------|-------------|-------------|----|-------------|-------------|-------------|
| C | 0.00000000  | 0.00000000  | 0.00000000  | H  | 3.27071100  | -2.36515300 | 2.36132700  |
| C | -0.45182000 | 1.09447300  | 0.91818900  | H  | 1.95676600  | -3.51246300 | 2.79013100  |
| C | 0.10110700  | 2.39544600  | 1.18837800  | H  | -2.42477400 | -2.10676700 | 0.94324700  |
| C | 1.20882500  | 3.11306400  | 0.70643100  | H  | -2.32128800 | -0.72494300 | 2.77654300  |
| H | 1.85790200  | 2.68165500  | -0.05157300 | C  | -3.92346300 | 0.09711500  | 1.61093800  |
| C | 1.46315000  | 4.38238700  | 1.21205200  | C  | -4.77698100 | 0.37922400  | 2.68466500  |
| C | 0.62933900  | 4.95500500  | 2.19366000  | C  | -6.12125400 | 0.71009600  | 2.50862000  |
| C | -0.47539100 | 4.27067200  | 2.68983000  | C  | -6.62684000 | 0.76933500  | 1.21369300  |
| C | -0.72813900 | 2.99430800  | 2.17932800  | C  | -5.81273600 | 0.50724100  | 0.11273500  |
| N | -1.73409100 | 2.09484600  | 2.47762600  | C  | -4.47826800 | 0.17599900  | 0.32583700  |
| H | -2.44514600 | 2.21809900  | 3.18275400  | H  | -3.82868900 | -0.05107100 | -0.51240200 |
| C | -1.55813000 | 0.95422200  | 1.71629500  | H  | -6.21844000 | 0.56030000  | -0.89163500 |
| C | -2.44427100 | -0.26107900 | 1.78778700  | Cl | -8.31707000 | 1.18134100  | 0.97356100  |
| N | -2.03854200 | -1.19362300 | 0.71358500  | H  | -6.75391700 | 0.91525900  | 3.36362800  |
| C | -0.59922400 | -1.33411300 | 0.48744200  | Cl | -4.18020300 | 0.34674500  | 4.35194800  |
| H | -0.47732500 | -2.07913400 | -0.31113000 | H  | -1.11769100 | 4.71339000  | 3.44678400  |
| C | 0.13084900  | -1.91871300 | 1.71048700  | H  | 0.85269000  | 5.94944000  | 2.57033000  |
| O | -0.43050000 | -2.40647400 | 2.67000500  | H  | 2.31730200  | 4.94573500  | 0.84615400  |
| O | 1.46994200  | -1.88942300 | 1.56678800  | H  | 1.09103700  | -0.07817200 | -0.02805200 |
| C | 2.22421400  | -2.46183600 | 2.65092700  | H  | -0.33781800 | 0.17316400  | -1.03080900 |
| H | 2.02955400  | -1.91764200 | 3.57847500  |    |             |             |             |

## 7a-02

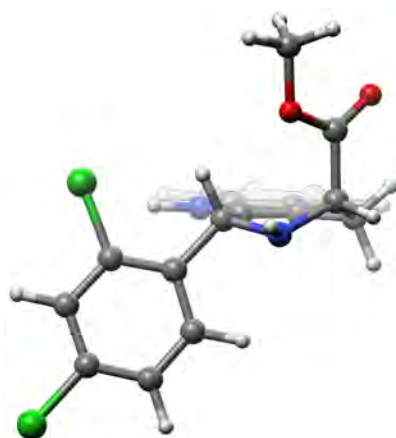

|   |             |             |             |    |             |             |             |
|---|-------------|-------------|-------------|----|-------------|-------------|-------------|
| C | 0.00000000  | 0.00000000  | 0.00000000  | H  | 0.94616600  | 4.03219600  | 3.83645000  |
| C | 0.41697300  | -1.04524700 | 0.98995100  | H  | -0.43777100 | 2.89376900  | 3.95653100  |
| C | -0.19592600 | -2.29422600 | 1.35930100  | H  | 2.59898700  | 2.00406800  | 0.69019200  |
| C | -1.34666100 | -2.98483100 | 0.94313300  | H  | 2.39822100  | 0.81377700  | 2.67799600  |
| H | -1.98801600 | -2.57098000 | 0.16917500  | C  | 3.95068600  | -0.18772900 | 1.59669000  |
| C | -1.65438300 | -4.20303300 | 1.53668000  | C  | 4.79171700  | -0.40430200 | 2.69509200  |
| C | -0.83282800 | -4.75038500 | 2.54283000  | C  | 6.11769700  | -0.81654800 | 2.55592500  |
| C | 0.31229700  | -4.09090400 | 2.97691000  | C  | 6.61711000  | -1.02664900 | 1.27429600  |
| C | 0.61872500  | -2.86586700 | 2.37757300  | C  | 5.81401300  | -0.83499500 | 0.15075000  |
| N | 1.67237000  | -1.99981300 | 2.60099100  | C  | 4.49759000  | -0.42045300 | 0.32680800  |
| H | 2.39718700  | -2.11987300 | 3.29212300  | H  | 3.85711600  | -0.24778000 | -0.53130200 |
| C | 1.54209700  | -0.90834800 | 1.76139700  | H  | 6.21418700  | -1.00670600 | -0.84248600 |
| C | 2.49191800  | 0.25970800  | 1.73147600  | Cl | 8.28467400  | -1.54077300 | 1.08021700  |
| N | 2.13399600  | 1.10682800  | 0.57805700  | H  | 6.74134800  | -0.96818600 | 3.42855900  |
| C | 0.70376500  | 1.32493500  | 0.34517900  | Cl | 4.20191200  | -0.17744200 | 4.35038000  |
| H | 0.63458600  | 1.99169500  | -0.52578400 | H  | 0.94437100  | -4.51373000 | 3.75364300  |
| C | -0.05901700 | 2.06723800  | 1.46213000  | H  | -1.09869400 | -5.70482200 | 2.98900600  |
| O | -1.26370200 | 2.08839800  | 1.57990100  | H  | -2.54238500 | -4.74485000 | 1.22266200  |
| O | 0.77905700  | 2.76566500  | 2.26429100  | H  | -1.08218800 | 0.16189900  | 0.02006200  |
| C | 0.13804900  | 3.54290000  | 3.29228900  | H  | 0.27040000  | -0.28659700 | -1.02514400 |
| H | -0.53313500 | 4.28263300  | 2.84842800  |    |             |             |             |

## 7a-03

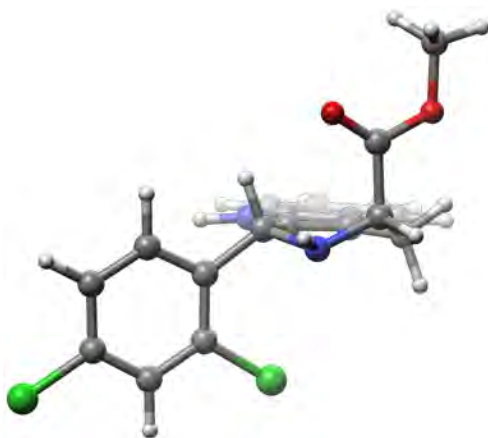

|   |             |             |             |    |             |             |             |
|---|-------------|-------------|-------------|----|-------------|-------------|-------------|
| C | 0.00000000  | 0.00000000  | 0.00000000  | H  | -3.04331400 | -2.82422400 | -2.15851100 |
| C | 0.40242700  | 1.07072900  | -0.96777600 | H  | -1.63673400 | -3.89374500 | -2.48035100 |
| C | -0.20810400 | 2.33018400  | -1.30372000 | H  | 2.59368400  | -1.98697400 | -0.76313300 |
| C | -1.36917800 | 3.00301200  | -0.88732800 | H  | 2.30340500  | -0.73747400 | -2.69544900 |
| H | -2.02706300 | 2.55859600  | -0.14461700 | C  | 3.95667800  | 0.13890900  | -1.71429000 |
| C | -1.66338600 | 4.24626200  | -1.43475900 | C  | 4.59694400  | 0.87185500  | -0.69871100 |
| C | -0.81806300 | 4.83672800  | -2.39532300 | C  | 5.96605300  | 1.13946500  | -0.74113500 |
| C | 0.33700900  | 4.19475400  | -2.83057300 | C  | 6.71980900  | 0.66917700  | -1.81415200 |
| C | 0.62881800  | 2.94443300  | -2.27938000 | C  | 6.12837900  | -0.06030300 | -2.84080900 |
| N | 1.68300200  | 2.08243200  | -2.52241100 | C  | 4.75933600  | -0.31220400 | -2.77149200 |
| H | 2.48508700  | 2.28453700  | -3.09941700 | H  | 4.29060200  | -0.88840800 | -3.56552600 |
| C | 1.54691100  | 0.96977200  | -1.71247200 | H  | 6.72229400  | -0.42567200 | -3.67118400 |
| C | 2.47069900  | -0.21278200 | -1.73981000 | Cl | 8.44202400  | 1.00841700  | -1.86298900 |
| N | 2.13973300  | -1.09124000 | -0.59900900 | H  | 6.43256300  | 1.70781200  | 0.05449500  |
| C | 0.71190600  | -1.31874000 | -0.37057900 | Cl | 3.71899600  | 1.50937100  | 0.67791800  |
| H | 0.63390000  | -2.00047000 | 0.48777400  | H  | 0.98732500  | 4.65075900  | -3.57282100 |
| C | 0.04284100  | -2.06141900 | -1.54285500 | H  | -1.07239500 | 5.81053700  | -2.80481400 |
| O | 0.64883700  | -2.57685600 | -2.46083100 | H  | -2.55820200 | 4.77503700  | -1.11765800 |
| O | -1.29529700 | -2.13544900 | -1.40388300 | H  | -1.08235000 | -0.16058000 | 0.00334000  |
| C | -1.98950800 | -2.86011900 | -2.43533400 | H  | 0.29069500  | 0.26944200  | 1.02423000  |
| H | -1.83040800 | -2.38587000 | -3.40704700 |    |             |             |             |

7a-04

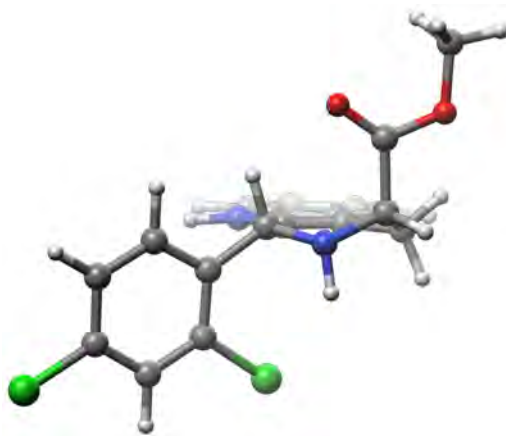

|   |             |             |             |    |             |             |             |
|---|-------------|-------------|-------------|----|-------------|-------------|-------------|
| C | 0.00000000  | 0.00000000  | 0.00000000  | H  | -2.86621000 | -3.28837800 | -1.84166300 |
| C | 0.47126700  | 1.09197600  | -0.91349000 | H  | -1.37323600 | -4.00932600 | -2.53046600 |
| C | -0.12023900 | 2.36185500  | -1.24538300 | H  | 2.59745600  | -0.83277500 | 0.32044900  |
| C | -1.29727600 | 3.02849000  | -0.86501800 | H  | 2.36651400  | -0.73586000 | -2.56821400 |
| H | -1.98958900 | 2.56814000  | -0.16439900 | C  | 4.04439000  | 0.10746800  | -1.60692600 |
| C | -1.56372100 | 4.28591500  | -1.39414500 | C  | 4.70457800  | 0.85010400  | -0.61390100 |
| C | -0.67463000 | 4.89722400  | -2.30059700 | C  | 6.07548300  | 1.10409000  | -0.66108100 |
| C | 0.49768900  | 4.26224500  | -2.69854800 | C  | 6.81730300  | 0.60421500  | -1.72822200 |
| C | 0.76094200  | 2.99720500  | -2.16682900 | C  | 6.21011500  | -0.14300400 | -2.73399200 |
| N | 1.82376500  | 2.13840200  | -2.38049100 | C  | 4.83967800  | -0.37856200 | -2.65559600 |
| H | 2.64209700  | 2.34495400  | -2.93244800 | H  | 4.36168600  | -0.96885000 | -3.43247200 |
| C | 1.65213700  | 1.00530500  | -1.60532200 | H  | 6.79600800  | -0.53441500 | -3.55816600 |
| C | 2.55147500  | -0.20451500 | -1.62813300 | Cl | 8.54141200  | 0.92437300  | -1.79557200 |
| N | 2.19439600  | -1.16144700 | -0.55480600 | H  | 6.55125500  | 1.68040300  | 0.12318400  |
| C | 0.75170300  | -1.32378500 | -0.33331900 | Cl | 3.83531400  | 1.50349700  | 0.77367400  |
| H | 0.64168000  | -2.00290000 | 0.52072700  | H  | 1.18207400  | 4.73421800  | -3.39905800 |
| C | 0.10854500  | -2.04611000 | -1.51910400 | H  | -0.90832900 | 5.88145900  | -2.69727300 |
| O | 0.62523100  | -2.28733700 | -2.58806800 | H  | -2.47097400 | 4.80949700  | -1.10490900 |
| O | -1.15886000 | -2.40295900 | -1.21273500 | H  | -1.08169200 | -0.15807800 | -0.07619000 |
| C | -1.87948800 | -3.08012600 | -2.25608100 | H  | 0.20002900  | 0.25310800  | 1.05211300  |
| H | -1.96020400 | -2.44398500 | -3.14138100 |    |             |             |             |

7a-05

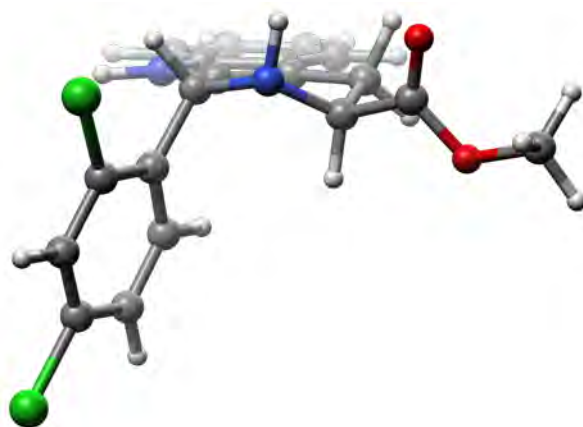

|   |             |             |             |    |             |             |             |
|---|-------------|-------------|-------------|----|-------------|-------------|-------------|
| C | 0.00000000  | 0.00000000  | 0.00000000  | H  | 1.48408800  | 4.20903300  | -2.27593900 |
| C | -0.04335600 | -1.45555900 | 0.35765400  | H  | 2.29677700  | 4.42269700  | -0.68933500 |
| C | -1.07136500 | -2.44301600 | 0.14938800  | H  | 1.79446700  | 0.48047400  | 2.09791800  |
| C | -2.34503600 | -2.42386200 | -0.44326300 | H  | 2.42791100  | -1.59575300 | 2.50465600  |
| H | -2.74288700 | -1.50429600 | -0.86503200 | C  | 3.50835300  | -1.96127500 | 0.70572300  |
| C | -3.08915600 | -3.59687300 | -0.48266300 | C  | 4.79249800  | -1.86804700 | 1.26517000  |
| C | -2.58622400 | -4.79567200 | 0.06169800  | C  | 5.92880000  | -2.32541200 | 0.60001500  |
| C | -1.32997900 | -4.84662100 | 0.65693600  | C  | 5.78288100  | -2.88740300 | -0.66659400 |
| C | -0.58413600 | -3.66493400 | 0.69465300  | C  | 4.53013500  | -2.99845100 | -1.26280200 |
| N | 0.67341800  | -3.41362200 | 1.21262500  | C  | 3.41289900  | -2.53806500 | -0.56714900 |
| H | 1.28103100  | -4.09918800 | 1.63433200  | H  | 2.43205800  | -2.62962700 | -1.02408500 |
| C | 0.99069100  | -2.08058800 | 1.00621200  | H  | 4.42867700  | -3.43794000 | -2.24899000 |
| C | 2.27201800  | -1.41961000 | 1.43375400  | Cl | 7.20826800  | -3.46709100 | -1.51318000 |
| N | 2.19792800  | 0.04314300  | 1.27267200  | H  | 6.90544300  | -2.24318400 | 1.06155100  |
| C | 1.47259900  | 0.50211800  | 0.08827700  | Cl | 5.03089900  | -1.16678600 | 2.86223100  |
| H | 2.01152500  | 0.15889400  | -0.80086600 | H  | -0.94448000 | -5.77204200 | 1.07717400  |
| C | 1.47544000  | 2.02283000  | 0.10920900  | H  | -3.19046300 | -5.69756100 | 0.01644000  |
| O | 1.38999900  | 2.69035400  | 1.11786300  | H  | -4.07528600 | -3.59319500 | -0.93884800 |
| O | 1.51872000  | 2.53665300  | -1.13527600 | H  | -0.62702700 | 0.59135200  | 0.68412600  |
| C | 1.44951000  | 3.97214700  | -1.21241600 | H  | -0.38560200 | 0.17907700  | -1.01208600 |
| H | 0.52068400  | 4.33594400  | -0.76532300 |    |             |             |             |



**7a-06**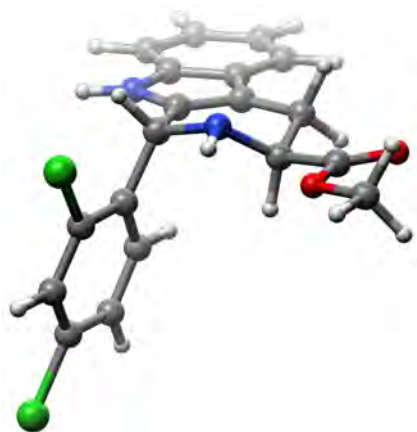

|   |             |             |             |    |             |             |             |
|---|-------------|-------------|-------------|----|-------------|-------------|-------------|
| C | 0.00000000  | 0.00000000  | 0.00000000  | H  | 4.61253600  | 3.32456800  | 0.43057700  |
| C | -0.32952400 | -1.37562200 | 0.50096800  | H  | 2.95198700  | 3.99914800  | 0.54187300  |
| C | -1.52098700 | -2.17243400 | 0.35859200  | H  | 2.94884900  | 0.11993100  | 1.56661300  |
| C | -2.75667300 | -1.98345300 | -0.28303100 | H  | 2.04847800  | -1.80336400 | 2.73754900  |
| H | -2.96425400 | -1.05943300 | -0.81650400 | C  | 3.04578000  | -2.45828500 | 0.96015100  |
| C | -3.70927400 | -2.99347800 | -0.22459000 | C  | 4.34278700  | -2.52719000 | 1.49348200  |
| C | -3.45388700 | -4.19552800 | 0.46576800  | C  | 5.38276500  | -3.20290200 | 0.85828100  |
| C | -2.24112700 | -4.41301000 | 1.11138000  | C  | 5.12539000  | -3.82836800 | -0.35991700 |
| C | -1.28520400 | -3.39497700 | 1.05034700  | C  | 3.85738200  | -3.78550700 | -0.93342300 |
| N | -0.01132300 | -3.32870900 | 1.58472000  | C  | 2.83849000  | -3.10720600 | -0.26637400 |
| H | 0.43403000  | -4.05025100 | 2.13038700  | H  | 1.84470300  | -3.08626500 | -0.70290200 |
| C | 0.55186600  | -2.10744800 | 1.25319900  | H  | 3.66797800  | -4.27767700 | -1.88108800 |
| C | 1.92582800  | -1.66491900 | 1.65625000  | Cl | 6.42490900  | -4.68381300 | -1.17232000 |
| N | 1.99845900  | -0.20859100 | 1.41941800  | H  | 6.36960100  | -3.23852600 | 1.30389600  |
| C | 1.52077800  | 0.21083600  | 0.09603800  | Cl | 4.72495900  | -1.73318100 | 3.02499800  |
| H | 2.00324400  | -0.36401300 | -0.72069500 | H  | -2.04644400 | -5.34048900 | 1.64394600  |
| C | 1.89154600  | 1.66661400  | -0.16521600 | H  | -4.21807400 | -4.96738700 | 0.49504600  |
| O | 1.18521700  | 2.47434800  | -0.72502300 | H  | -4.66825600 | -2.85718300 | -0.71692000 |
| O | 3.14585100  | 1.93933700  | 0.26067100  | H  | -0.50760500 | 0.77102500  | 0.59374000  |
| C | 3.60004000  | 3.28438300  | 0.02852300  | H  | -0.32162900 | 0.14387700  | -1.03760600 |
| H | 3.59990200  | 3.50706800  | -1.04150800 |    |             |             |             |

7a-07

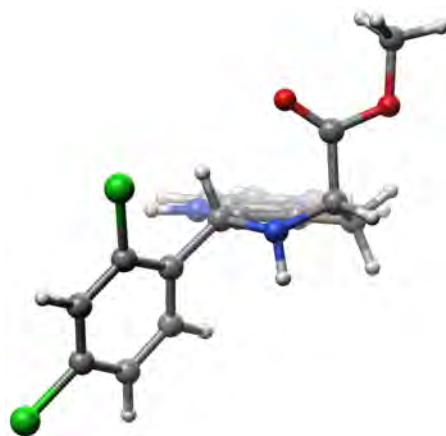

|   |             |             |             |    |             |             |             |
|---|-------------|-------------|-------------|----|-------------|-------------|-------------|
| C | 0.00000000  | 0.00000000  | 0.00000000  | H  | 2.73491100  | -3.54181800 | 1.57734200  |
| C | -0.33536200 | 1.06288300  | 1.00470300  | H  | 1.23791600  | -4.15747300 | 2.35438200  |
| C | 0.39404700  | 2.23781200  | 1.40741300  | H  | -2.65840600 | -0.66264000 | -0.21274200 |
| C | 1.60388900  | 2.82898300  | 1.00645400  | H  | -2.38754100 | -0.68173200 | 2.67012600  |
| H | 2.20341500  | 2.37816000  | 0.21949200  | C  | -3.92719300 | 0.38856800  | 1.63665100  |
| C | 2.02307200  | 3.99927800  | 1.62823100  | C  | -5.00489400 | -0.27732000 | 2.24171300  |
| C | 1.25490400  | 4.59664100  | 2.64765200  | C  | -6.32155400 | 0.16152500  | 2.09200000  |
| C | 0.05376500  | 4.03483700  | 3.06833900  | C  | -6.57230300 | 1.28664800  | 1.31110300  |
| C | -0.36248700 | 2.85574200  | 2.44381100  | C  | -5.53462300 | 1.97407500  | 0.68553500  |
| N | -1.48826300 | 2.08022700  | 2.65097300  | C  | -4.23090500 | 1.51558800  | 0.85870300  |
| H | -2.23155900 | 2.28576700  | 3.30083000  | H  | -3.41370000 | 2.05063200  | 0.38237600  |
| C | -1.47250400 | 1.01062100  | 1.77164900  | H  | -5.74211600 | 2.84925300  | 0.07983300  |
| C | -2.48861100 | -0.10087000 | 1.74829000  | Cl | -8.22642100 | 1.84342900  | 1.11982800  |
| N | -2.22570200 | -1.04008900 | 0.62867500  | H  | -7.13272700 | -0.36943900 | 2.57528200  |
| C | -0.81143200 | -1.28815700 | 0.32699600  | Cl | -4.74805100 | -1.70646600 | 3.22959600  |
| H | -0.78812100 | -1.94339300 | -0.55191400 | H  | -0.53619700 | 4.49518100  | 3.85682900  |
| C | -0.15466300 | -2.08100500 | 1.45827400  | H  | 1.60716000  | 5.51182700  | 3.11559700  |
| O | -0.62263400 | -2.30147300 | 2.55250600  | H  | 2.95715800  | 4.46440400  | 1.32514400  |
| O | 1.06334600  | -2.52110100 | 1.06786700  | H  | 1.07244200  | -0.22525100 | -0.00676400 |
| C | 1.79519600  | -3.26559500 | 2.05631800  | H  | -0.25275500 | 0.31754300  | -1.02293500 |
| H | 1.98004100  | -2.64972100 | 2.94037600  |    |             |             |             |

**7a-08**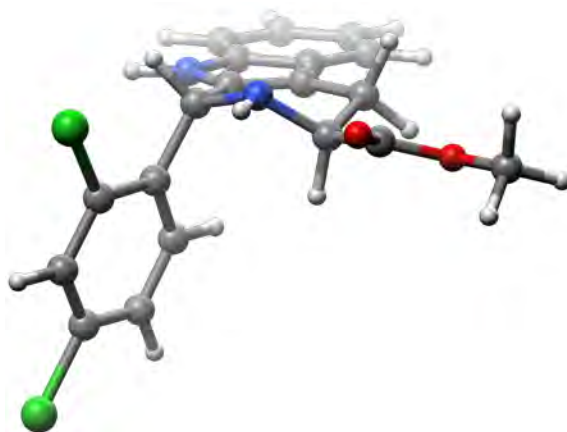

|   |            |            |            |    |            |            |            |
|---|------------|------------|------------|----|------------|------------|------------|
| C | 0.0000000  | 0.0000000  | 0.0000000  | H  | 0.4850650  | 4.1919720  | -1.8832960 |
| C | -0.1228020 | -1.4550460 | 0.3523760  | H  | 2.2161590  | 4.0759510  | -1.4191740 |
| C | -1.1929330 | -2.3926250 | 0.1285340  | H  | 2.8984780  | 0.4000680  | 1.5881750  |
| C | -2.4571920 | -2.3125010 | -0.4794460 | H  | 2.3348580  | -1.7754270 | 2.5167210  |
| H | -2.8057980 | -1.3743160 | -0.9037220 | C  | 3.3872240  | -2.0982430 | 0.6805650  |
| C | -3.2560730 | -3.4484580 | -0.5295110 | C  | 4.6888440  | -2.0348710 | 1.2031760  |
| C | -2.8177170 | -4.6709310 | 0.0182370  | C  | 5.8033020  | -2.4901410 | 0.5011850  |
| C | -1.5719380 | -4.7830320 | 0.6268570  | C  | 5.6176300  | -3.0218440 | -0.7732210 |
| C | -0.7711790 | -3.6384230 | 0.6754330  | C  | 4.3476550  | -3.1022580 | -1.3381380 |
| N | 0.4925420  | -3.4505540 | 1.2049020  | C  | 3.2540810  | -2.6445410 | -0.6046060 |
| H | 1.0478300  | -4.1574340 | 1.6619030  | H  | 2.2606090  | -2.7211350 | -1.0355930 |
| C | 0.8709270  | -2.1328820 | 1.0109450  | H  | 4.2148570  | -3.5196250 | -2.3302910 |
| C | 2.1776750  | -1.5443250 | 1.4558720  | Cl | 7.0118880  | -3.6004660 | -1.6692340 |
| N | 2.0312990  | -0.0833700 | 1.3687340  | H  | 6.7922580  | -2.4290480 | 0.9393160  |
| C | 1.4877340  | 0.3959670  | 0.1019810  | Cl | 4.9782170  | -1.3530760 | 2.8058430  |
| H | 2.0078270  | -0.0370640 | -0.7772680 | H  | -1.2356970 | -5.7266090 | 1.0491050  |
| C | 1.7438710  | 1.8946230  | 0.0146320  | H  | -3.4641890 | -5.5425910 | -0.0352640 |
| O | 2.5811170  | 2.4853030  | 0.6633150  | H  | -4.2356510 | -3.3968510 | -0.9968700 |
| O | 0.9644840  | 2.4810660  | -0.9142370 | H  | -0.5906260 | 0.6215230  | 0.6869100  |
| C | 1.1859050  | 3.8898750  | -1.1048460 | H  | -0.3670210 | 0.2039620  | -1.0118160 |
| H | 0.9920920  | 4.4357350  | -0.1780700 |    |            |            |            |

7a-09

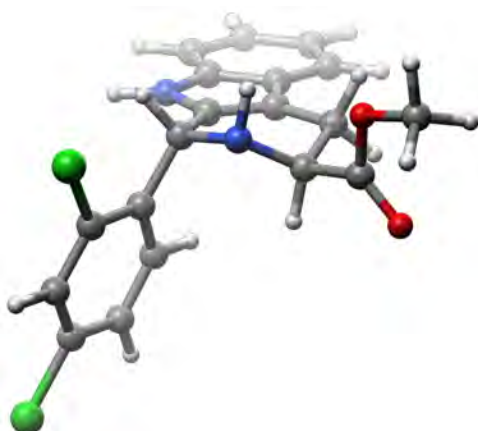

|   |             |             |             |    |             |             |             |
|---|-------------|-------------|-------------|----|-------------|-------------|-------------|
| C | 0.0000000   | 0.0000000   | 0.0000000   | H  | 0.97813300  | 4.59873300  | 1.56631100  |
| C | -0.06468400 | -1.38434000 | 0.57536000  | H  | 0.49449100  | 4.43411900  | -0.15547300 |
| C | -1.09863400 | -2.38486400 | 0.50159200  | H  | 1.66945300  | 0.74043400  | 2.06999100  |
| C | -2.36384200 | -2.44638700 | -0.10644200 | H  | 2.36652300  | -1.22920400 | 2.77007800  |
| H | -2.74629900 | -1.59903200 | -0.66977800 | C  | 3.48010500  | -1.82307200 | 1.05574100  |
| C | -3.11907500 | -3.60577800 | 0.02205700  | C  | 4.75552400  | -1.62724300 | 1.60905600  |
| C | -2.63570400 | -4.71186500 | 0.74970300  | C  | 5.90614900  | -2.16316500 | 1.03372900  |
| C | -1.38794700 | -4.68181000 | 1.36373700  | C  | 5.78403600  | -2.91378500 | -0.13393400 |
| C | -0.63109400 | -3.51390900 | 1.23266500  | C  | 4.54060600  | -3.13360900 | -0.71923000 |
| N | 0.62120700  | -3.19686500 | 1.72674600  | C  | 3.40840100  | -2.58916900 | -0.11443300 |
| H | 1.21542300  | -3.81565500 | 2.25686300  | H  | 2.43467900  | -2.76465400 | -0.56186600 |
| C | 0.95419400  | -1.91250600 | 1.32695400  | H  | 4.45754500  | -3.71938300 | -1.62799800 |
| C | 2.22939600  | -1.19890300 | 1.68237100  | Cl | 7.22755100  | -3.59396600 | -0.86641000 |
| N | 2.14893300  | 0.23372200  | 1.32930100  | H  | 6.87559100  | -1.99704400 | 1.48776300  |
| C | 1.47260300  | 0.49933900  | 0.05337600  | Cl | 4.96313400  | -0.69208500 | 3.08634500  |
| H | 2.03989700  | -0.00176500 | -0.73666700 | H  | -1.01724900 | -5.53570500 | 1.92505600  |
| C | 1.52904700  | 1.98549200  | -0.27105900 | H  | -3.24824800 | -5.60538300 | 0.83304100  |
| O | 1.75616600  | 2.44800200  | -1.36605400 | H  | -4.09861400 | -3.66379900 | -0.44449100 |
| O | 1.22906000  | 2.73599400  | 0.81366800  | H  | -0.64366000 | 0.69241700  | 0.56258500  |
| C | 1.23274600  | 4.15830800  | 0.60200000  | H  | -0.35265100 | 0.02098800  | -1.03946800 |
| H | 2.22072400  | 4.49217200  | 0.27507900  |    |             |             |             |

**7a-10**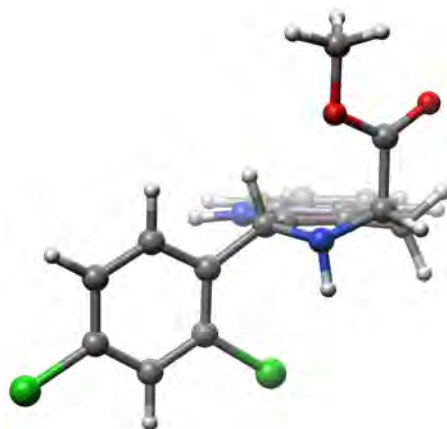

|   |             |             |             |    |             |             |             |
|---|-------------|-------------|-------------|----|-------------|-------------|-------------|
| C | 0.00000000  | 0.00000000  | 0.00000000  | H  | -1.21676500 | 3.96030800  | -3.77061700 |
| C | -0.38188100 | -1.04655600 | -1.00443300 | H  | 0.32584500  | 3.03814600  | -3.75823100 |
| C | 0.30335500  | -2.24023800 | -1.42786900 | H  | -2.65919400 | 0.63643300  | 0.33360200  |
| C | 1.52143300  | -2.84864900 | -1.08104800 | H  | -2.40798000 | 0.76071700  | -2.55248800 |
| H | 2.17049300  | -2.39584500 | -0.33588300 | C  | -4.00797200 | -0.27917800 | -1.66411200 |
| C | 1.88467900  | -4.03694000 | -1.70365000 | C  | -4.60942400 | -1.13751500 | -0.72821000 |
| C | 1.05307900  | -4.63512100 | -2.67148800 | C  | -5.95516800 | -1.49701000 | -0.80532100 |
| C | -0.15654400 | -4.05494700 | -3.03999900 | C  | -6.73151100 | -0.98941400 | -1.84388100 |
| C | -0.51681100 | -2.85848600 | -2.41431100 | C  | -6.18275600 | -0.13097600 | -2.79277000 |
| N | -1.63347900 | -2.05929700 | -2.58366900 | C  | -4.83635700 | 0.20861900  | -2.68571800 |
| H | -2.43903200 | -2.29254600 | -3.14380700 | H  | -4.40594800 | 0.88539300  | -3.41878400 |
| C | -1.55478000 | -0.98648700 | -1.71156300 | H  | -6.79495600 | 0.26532700  | -3.59519000 |
| C | -2.54312500 | 0.15038300  | -1.65012500 | Cl | -8.42310600 | -1.44230900 | -1.94825000 |
| N | -2.26316200 | 1.04836400  | -0.50861700 | H  | -6.38542000 | -2.16079600 | -0.06514600 |
| C | -0.83616800 | 1.28446800  | -0.24698600 | Cl | -3.69704500 | -1.81057100 | 0.62065200  |
| H | -0.79704000 | 1.90006700  | 0.66195600  | H  | -0.79544500 | -4.51586800 | -3.78918000 |
| C | -0.15252300 | 2.15411700  | -1.31100400 | H  | 1.36237100  | -5.56503000 | -3.14089400 |
| O | 1.04501700  | 2.34233300  | -1.33753600 | H  | 2.82451100  | -4.51541600 | -1.44186400 |
| O | -1.00935600 | 2.72652900  | -2.18010800 | H  | 1.06406500  | 0.25162400  | -0.05756200 |
| C | -0.39729500 | 3.59123300  | -3.15322600 | H  | -0.18737300 | -0.35195600 | 1.02534900  |
| H | 0.11523500  | 4.42027800  | -2.65863200 |    |             |             |             |

**7a-11**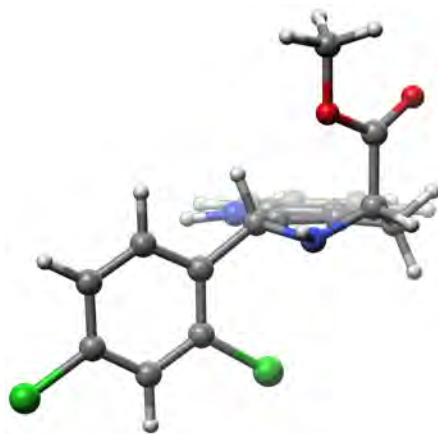

|   |             |             |             |    |             |             |             |
|---|-------------|-------------|-------------|----|-------------|-------------|-------------|
| C | 0.0000000   | 0.0000000   | 0.0000000   | H  | -1.26422100 | 4.21026200  | -3.56061800 |
| C | -0.34708400 | -1.03665300 | -1.02546200 | H  | 0.19207400  | 3.17969100  | -3.77024600 |
| C | 0.34079000  | -2.23237400 | -1.43752100 | H  | -2.75442900 | 1.83194200  | -0.59577500 |
| C | 1.54588000  | -2.85061000 | -1.06416500 | H  | -2.37582800 | 0.74439200  | -2.64028500 |
| H | 2.18000500  | -2.40538300 | -0.30180400 | C  | -3.95900400 | -0.29974300 | -1.71395600 |
| C | 1.91505900  | -4.03954000 | -1.68199300 | C  | -4.54460900 | -1.13592100 | -0.74579100 |
| C | 1.10238200  | -4.62832100 | -2.67140800 | C  | -5.89290000 | -1.49180000 | -0.80619600 |
| C | -0.09367600 | -4.03797500 | -3.06693300 | C  | -6.68082700 | -1.00866800 | -1.84850000 |
| C | -0.46046500 | -2.84156400 | -2.44517000 | C  | -6.14321100 | -0.17968500 | -2.82819500 |
| N | -1.56719500 | -2.03411000 | -2.63932800 | C  | -4.79414500 | 0.15924600  | -2.74201200 |
| H | -2.36739700 | -2.26539100 | -3.20796000 | H  | -4.36841300 | 0.81210600  | -3.50029700 |
| C | -1.49883900 | -0.96644800 | -1.76159200 | H  | -6.76297100 | 0.19423600  | -3.63555800 |
| C | -2.49927000 | 0.15185200  | -1.71495300 | Cl | -8.37600800 | -1.45917400 | -1.91922700 |
| N | -2.22158400 | 0.96948400  | -0.52206400 | H  | -6.31706100 | -2.13839200 | -0.04744600 |
| C | -0.81221500 | 1.28170700  | -0.27146200 | Cl | -3.62181900 | -1.79711400 | 0.58868200  |
| H | -0.79281200 | 1.90008400  | 0.63700300  | H  | -0.71804700 | -4.49178100 | -3.83248500 |
| C | -0.11133900 | 2.14743500  | -1.33999200 | H  | 1.41567100  | -5.55924600 | -3.13610900 |
| O | 1.08740900  | 2.26185500  | -1.46410600 | H  | 2.84465100  | -4.52604000 | -1.39930300 |
| O | -1.00283300 | 2.84035900  | -2.09076000 | H  | 1.06518600  | 0.25023200  | -0.02153900 |
| C | -0.42206400 | 3.73488100  | -3.05679900 | H  | -0.23457500 | -0.35564600 | 1.01192400  |
| H | 0.20135000  | 4.48211400  | -2.55912100 |    |             |             |             |

## 7a-12

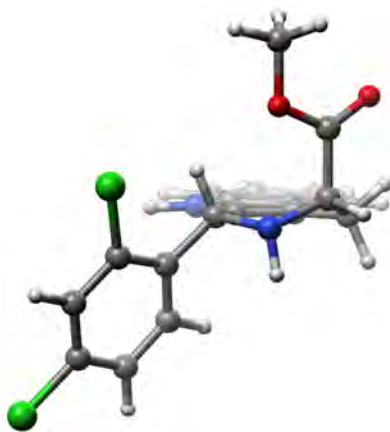

|   |             |             |             |    |             |             |             |
|---|-------------|-------------|-------------|----|-------------|-------------|-------------|
| C | 0.00000000  | 0.00000000  | 0.00000000  | H  | 1.36868200  | 3.95748500  | 3.70225200  |
| C | 0.25034900  | -1.01412700 | 1.07773200  | H  | -0.24190400 | 3.16176700  | 3.64823100  |
| C | -0.56840400 | -2.10015900 | 1.55289500  | H  | 2.71190100  | 0.41905400  | -0.24019200 |
| C | -1.81929600 | -2.62064300 | 1.18132500  | H  | 2.44018300  | 0.67662200  | 2.63151000  |
| H | -2.38044300 | -2.17474400 | 0.36416300  | C  | 3.88245800  | -0.59015900 | 1.69867300  |
| C | -2.32884000 | -3.71245500 | 1.87385400  | C  | 5.00450100  | 0.01109800  | 2.28941200  |
| C | -1.61198700 | -4.29928100 | 2.93603000  | C  | 6.28002900  | -0.54722000 | 2.19151700  |
| C | -0.37319700 | -3.80435100 | 3.33057700  | C  | 6.44366500  | -1.73138100 | 1.47766500  |
| C | 0.13421700  | -2.70379400 | 2.63410500  | C  | 5.35943200  | -2.35939900 | 0.86826000  |
| N | 1.31422700  | -2.00223800 | 2.80269600  | C  | 4.09852800  | -1.78079300 | 0.98912000  |
| H | 2.04784800  | -2.23741300 | 3.45348500  | H  | 3.24476600  | -2.26800500 | 0.52574300  |
| C | 1.38462800  | -0.99800100 | 1.85016000  | H  | 5.49872400  | -3.28175300 | 0.31534700  |
| C | 2.48807800  | 0.02287800  | 1.75367000  | Cl | 8.04445100  | -2.44002100 | 1.35277300  |
| N | 2.30772400  | 0.89173500  | 0.56648800  | H  | 7.12678500  | -0.06263400 | 2.66238900  |
| C | 0.91730200  | 1.22904000  | 0.23535100  | Cl | 4.86110200  | 1.51026800  | 3.19720100  |
| H | 0.96223400  | 1.81174200  | -0.69463400 | H  | 0.17646000  | -4.25557600 | 4.15276300  |
| C | 0.25950500  | 2.18159200  | 1.24292100  | H  | -2.03513100 | -5.15252200 | 3.45909300  |
| O | -0.92055300 | 2.45999200  | 1.20966500  | H  | -3.29549500 | -4.12274400 | 1.59484200  |
| O | 1.12180100  | 2.70796200  | 2.13110600  | H  | -1.04431400 | 0.32901400  | -0.00874400 |
| C | 0.54543600  | 3.64177200  | 3.06129300  | H  | 0.20927200  | -0.41422000 | -0.99755800 |
| H | 0.12037500  | 4.49673600  | 2.52926700  |    |             |             |             |

## 7a-13

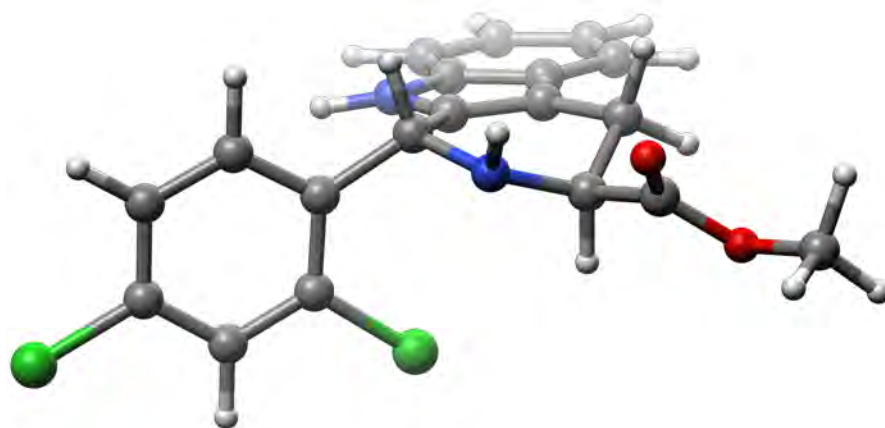

|   |             |             |             |    |             |             |             |
|---|-------------|-------------|-------------|----|-------------|-------------|-------------|
| C | 0.00000000  | 0.00000000  | 0.00000000  | H  | -1.80034900 | 4.10388200  | -1.84726700 |
| C | 0.72080900  | -1.31143400 | 0.02461100  | H  | -0.43403400 | 4.85511700  | -0.95707400 |
| C | 0.28433900  | -2.65394000 | -0.25552700 | H  | 2.20340600  | 1.68159500  | 1.19502200  |
| C | -0.94191300 | -3.23376300 | -0.62233700 | H  | 2.95046200  | -0.25955500 | 1.86030400  |
| H | -1.82962900 | -2.61728800 | -0.73978100 | C  | 4.37005400  | -0.31679200 | 0.31456900  |
| C | -1.00439200 | -4.60597100 | -0.83242700 | C  | 4.81411600  | -0.26779700 | -1.01649100 |
| C | 0.13797400  | -5.41795100 | -0.68281100 | C  | 6.16598200  | -0.35340600 | -1.34897600 |
| C | 1.36555500  | -4.87488400 | -0.31800600 | C  | 7.10685400  | -0.49597600 | -0.33122100 |
| C | 1.42477000  | -3.49480200 | -0.10537400 | C  | 6.71475600  | -0.55512000 | 1.00236600  |
| N | 2.48729100  | -2.69075100 | 0.26568500  | C  | 5.35577000  | -0.46428700 | 1.29966300  |
| H | 3.44808300  | -2.98699900 | 0.34625600  | H  | 5.04519100  | -0.50050300 | 2.34149100  |
| C | 2.05604100  | -1.37740100 | 0.32150100  | H  | 7.45262600  | -0.66363100 | 1.78951100  |
| C | 2.90258000  | -0.21747800 | 0.76024800  | Cl | 8.80874800  | -0.60337000 | -0.74851800 |
| N | 2.28469600  | 1.06480800  | 0.39324700  | H  | 6.47580300  | -0.31042500 | -2.38629000 |
| C | 1.03923300  | 1.10111700  | -0.36807600 | Cl | 3.68672300  | -0.10580100 | -2.35302100 |
| H | 1.25658800  | 0.99233500  | -1.43555700 | H  | 2.24557700  | -5.50247000 | -0.20242900 |
| C | 0.41920200  | 2.47363900  | -0.15082900 | H  | 0.05918500  | -6.48795400 | -0.85455300 |
| O | 0.64205100  | 3.19250900  | 0.80211500  | H  | -1.94801200 | -5.06381400 | -1.11651000 |
| O | -0.45500900 | 2.77386600  | -1.12851600 | H  | -0.45746800 | 0.23254200  | 0.97371600  |
| C | -1.14652700 | 4.02666500  | -0.97844800 | H  | -0.80718500 | 0.00514000  | -0.74183000 |
| H | -1.73048000 | 4.03440800  | -0.05433000 |    |             |             |             |



## 7a-14

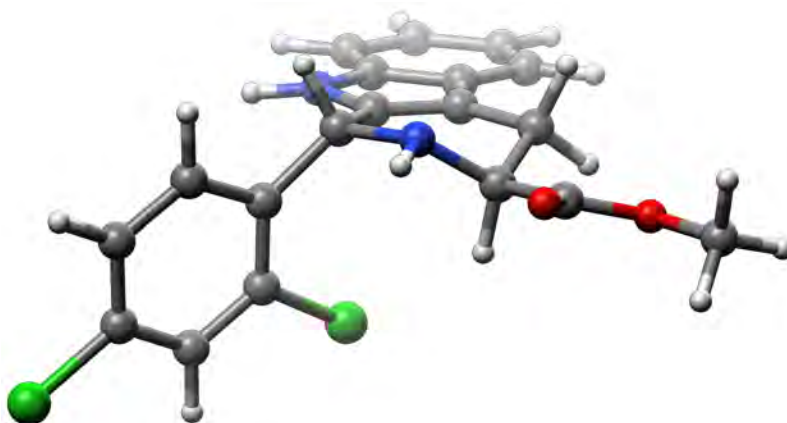

|   |             |             |             |    |             |             |             |
|---|-------------|-------------|-------------|----|-------------|-------------|-------------|
| C | 0.0000000   | 0.0000000   | 0.0000000   | H  | 0.85286300  | 4.28981400  | 1.49027700  |
| C | -0.29369800 | -1.46005500 | -0.18651500 | H  | -0.91494500 | 4.56889200  | 1.34214600  |
| C | 0.50835500  | -2.62571800 | 0.07754800  | H  | -2.96216600 | 1.01441100  | -1.14865500 |
| C | 1.81083600  | -2.83186200 | 0.56274000  | H  | -2.74216200 | -1.23781600 | -2.21152500 |
| H | 2.44334500  | -1.98559200 | 0.81876000  | C  | -4.02888200 | -1.34477800 | -0.55947300 |
| C | 2.27897800  | -4.13194400 | 0.71100300  | C  | -4.37909600 | -1.58328500 | 0.78155400  |
| C | 1.46981800  | -5.23826600 | 0.38287100  | C  | -5.69990500 | -1.80989100 | 1.17444800  |
| C | 0.17725200  | -5.06745800 | -0.10241800 | C  | -6.71016300 | -1.79287100 | 0.21705800  |
| C | -0.28914100 | -3.75874100 | -0.25262700 | C  | -6.41638300 | -1.56018000 | -1.12322200 |
| N | -1.50490700 | -3.28844300 | -0.71466700 | C  | -5.08861900 | -1.34650300 | -1.48257900 |
| H | -2.30877900 | -3.85928800 | -0.92676500 | H  | -4.85640900 | -1.16985100 | -2.53029200 |
| C | -1.50312300 | -1.90563300 | -0.65052300 | H  | -7.20493000 | -1.55065600 | -1.86757000 |
| C | -2.62721100 | -1.03888900 | -1.13409800 | Cl | -8.36857700 | -2.07507800 | 0.71513100  |
| N | -2.19535800 | 0.35896100  | -1.03557100 | H  | -5.93065600 | -1.99685700 | 2.21635400  |
| C | -1.34629100 | 0.74578900  | 0.08781300  | Cl | -3.18561000 | -1.63525700 | 2.07511800  |
| H | -1.78849600 | 0.50814700  | 1.07231300  | H  | -0.44503200 | -5.92195600 | -0.35612700 |
| C | -1.22674300 | 2.26414900  | 0.06358600  | H  | 1.86199900  | -6.24359200 | 0.51018700  |
| O | -2.01192600 | 3.00496700  | -0.49067200 | H  | 3.28460100  | -4.30194500 | 1.08598500  |
| O | -0.17566900 | 2.69541100  | 0.78667500  | H  | 0.58815700  | 0.40261900  | -0.83632800 |
| C | -0.03213200 | 4.12394100  | 0.87567700  | H  | 0.57703400  | 0.17762100  | 0.91380100  |
| H | 0.10186600  | 4.55737100  | -0.11866500 |    |             |             |             |

## 7a-15

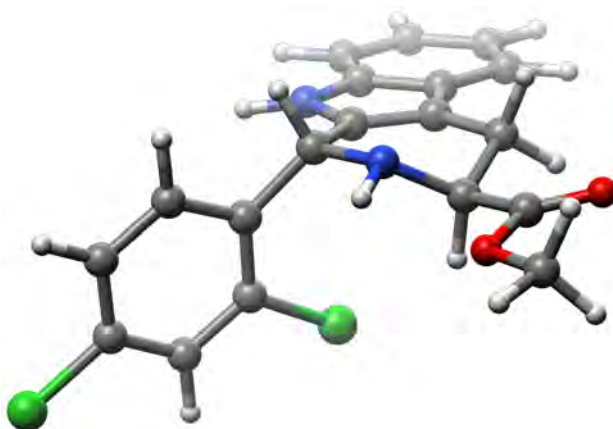

|   |             |             |             |    |             |             |             |
|---|-------------|-------------|-------------|----|-------------|-------------|-------------|
| C | 0.00000000  | 0.00000000  | 0.00000000  | H  | -3.80423600 | 4.25675600  | -0.05486100 |
| C | -0.10050500 | -1.47569200 | -0.24341300 | H  | -2.13614100 | 4.48992300  | -0.67724300 |
| C | 0.84599600  | -2.53886500 | -0.02955800 | H  | -3.15191500 | 0.61583100  | -0.95658900 |
| C | 2.16412600  | -2.59649400 | 0.45350200  | H  | -2.53575100 | -1.45099600 | -2.27431700 |
| H | 2.68157900  | -1.68806800 | 0.75123300  | C  | -3.81414500 | -1.87035800 | -0.66828000 |
| C | 2.79627100  | -3.83064500 | 0.54614600  | C  | -4.15431400 | -2.20106500 | 0.65604000  |
| C | 2.13709600  | -5.01619600 | 0.16363200  | C  | -5.42572200 | -2.66291100 | 1.00152600  |
| C | 0.83348800  | -4.99207200 | -0.32157600 | C  | -6.39629300 | -2.79636700 | 0.01220300  |
| C | 0.20179500  | -3.74901500 | -0.41572900 | C  | -6.11034700 | -2.48171000 | -1.31281100 |
| N | -1.06536500 | -3.41940200 | -0.86153600 | C  | -4.83053300 | -2.03087700 | -1.62521000 |
| H | -1.78869100 | -4.07899700 | -1.10393300 | H  | -4.60299300 | -1.78871700 | -2.66071000 |
| C | -1.24211500 | -2.05185000 | -0.73204700 | H  | -6.86757900 | -2.58979300 | -2.08149100 |
| C | -2.46847200 | -1.31853200 | -1.18254300 | Cl | -7.99380100 | -3.37340300 | 0.45112900  |
| N | -2.26286600 | 0.12723500  | -0.97488300 | H  | -5.64980100 | -2.91396100 | 2.03135900  |
| C | -1.42110300 | 0.56279000  | 0.14917300  | Cl | -3.00451200 | -2.07445600 | 1.98147200  |
| H | -1.81584000 | 0.23728300  | 1.12755400  | H  | 0.32711200  | -5.90739800 | -0.61750400 |
| C | -1.40739300 | 2.08730400  | 0.20177100  | H  | 2.65603800  | -5.96716500 | 0.24772900  |
| O | -0.43361000 | 2.77225200  | 0.41859600  | H  | 3.81532400  | -3.88597700 | 0.91924000  |
| O | -2.65152700 | 2.59435200  | 0.03153100  | H  | 0.51043100  | 0.51637000  | -0.82341500 |
| C | -2.74963300 | 4.02736800  | 0.10010700  | H  | 0.57037300  | 0.22049200  | 0.90897700  |
| H | -2.41655500 | 4.38622500  | 1.07730400  |    |             |             |             |

## 7a-16

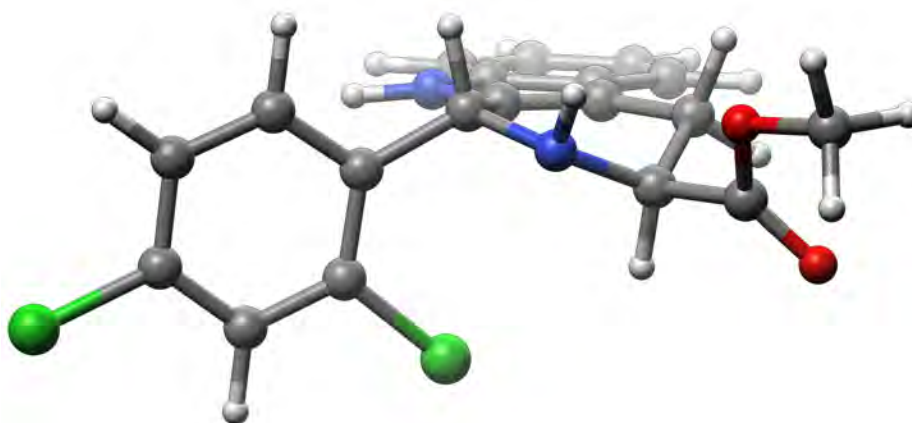

|   |            |            |            |    |            |            |            |
|---|------------|------------|------------|----|------------|------------|------------|
| C | 0.0000000  | 0.0000000  | 0.0000000  | H  | -0.4180500 | 4.8247080  | -1.6040510 |
| C | -0.6203300 | -1.3511840 | -0.1752200 | H  | 0.8923910  | 4.3776880  | -0.4599770 |
| C | -0.0977370 | -2.6803970 | 0.0021890  | H  | -2.2062370 | 1.5785150  | -1.1896760 |
| C | 1.1565400  | -3.2049390 | 0.3574910  | H  | -2.8667990 | -0.3010230 | -1.9865590 |
| H | 1.9945730  | -2.5419050 | 0.5569930  | C  | -4.3253340 | -0.5779480 | -0.5071900 |
| C | 1.3103250  | -4.5827450 | 0.4509590  | C  | -4.8203880 | -0.6810430 | 0.8028260  |
| C | 0.2325290  | -5.4544960 | 0.1955730  | C  | -6.1754200 | -0.8804530 | 1.0684360  |
| C | -1.0205160 | -4.9666970 | -0.1603430 | C  | -7.0675320 | -0.9856320 | 0.0036770  |
| C | -1.1715570 | -3.5804950 | -0.2556760 | C  | -6.6236800 | -0.8963280 | -1.3120110 |
| N | -2.2787710 | -2.8214920 | -0.5893170 | C  | -5.2639110 | -0.6943890 | -1.5419020 |
| H | -3.2135390 | -3.1748530 | -0.7260340 | H  | -4.9149360 | -0.6163670 | -2.5691030 |
| C | -1.9403570 | -1.4817220 | -0.5179220 | H  | -7.3233410 | -0.9775630 | -2.1364010 |
| C | -2.8543130 | -0.3489130 | -0.8864160 | Cl | -8.7727050 | -1.2357540 | 0.3367950  |
| N | -2.3320230 | 0.9472560  | -0.4071900 | H  | -6.5244550 | -0.9527970 | 2.0915310  |
| C | -1.1327860 | 0.9739790  | 0.4377570  | Cl | -3.7578800 | -0.5740430 | 2.1957270  |
| H | -1.4112890 | 0.7022700  | 1.4586180  | H  | -1.8506600 | -5.6403470 | -0.3571240 |
| C | -0.5709230 | 2.3855220  | 0.5284680  | H  | 0.3824110  | -6.5275530 | 0.2774280  |
| O | 0.0203410  | 2.8201560  | 1.4907610  | H  | 2.2759940  | -4.9983410 | 0.7256240  |
| O | -0.7379150 | 3.0832580  | -0.6209480 | H  | 0.4656900  | 0.3648000  | -0.9279610 |
| C | -0.1880170 | 4.4123470  | -0.6213050 | H  | 0.7818050  | -0.0093150 | 0.7689770  |
| H | -0.6468870 | 5.0143350  | 0.1669140  |    |            |            |            |

7a Shielding tensors B3LYP/6-311+G(2d,p)//B3LYP/6-31G(d) SCRF = (PCM, CHCl<sub>3</sub>)

|            | <b>7a-01</b> | <b>7a-02</b> | <b>7a-03</b> | <b>7a-04</b> | <b>7a-05</b> | <b>7a-06</b> | <b>7a-07</b> | <b>7a-08</b> |
|------------|--------------|--------------|--------------|--------------|--------------|--------------|--------------|--------------|
| <b>1</b>   | 127.39       | 126.30       | 121.04       | 121.58       | 127.11       | 124.72       | 126.27       | 125.04       |
| <b>3</b>   | 120.96       | 120.36       | 121.25       | 121.97       | 126.69       | 126.95       | 121.97       | 127.10       |
| <b>4</b>   | 154.79       | 155.60       | 155.44       | 152.25       | 151.69       | 153.85       | 151.55       | 152.86       |
| <b>4a</b>  | 70.56        | 69.55        | 69.04        | 69.11        | 64.90        | 64.79        | 67.04        | 64.25        |
| <b>4b</b>  | 49.87        | 50.05        | 49.95        | 49.24        | 49.15        | 49.44        | 49.15        | 49.18        |
| <b>5</b>   | 60.24        | 60.45        | 60.89        | 61.03        | 60.03        | 59.28        | 60.60        | 60.07        |
| <b>6</b>   | 59.13        | 59.20        | 59.12        | 59.07        | 57.99        | 58.68        | 58.65        | 58.23        |
| <b>7</b>   | 56.55        | 56.66        | 56.71        | 56.74        | 55.54        | 56.11        | 56.09        | 55.72        |
| <b>8</b>   | 68.26        | 68.74        | 68.32        | 68.32        | 68.46        | 67.24        | 67.94        | 68.27        |
| <b>8a</b>  | 40.98        | 40.12        | 40.59        | 41.02        | 40.69        | 40.33        | 40.50        | 40.25        |
| <b>9a</b>  | 42.39        | 43.15        | 43.76        | 42.47        | 44.79        | 45.70        | 42.77        | 44.14        |
| <b>1'</b>  | 33.62        | 33.90        | 36.06        | 37.29        | 35.21        | 36.34        | 34.98        | 36.20        |
| <b>2'</b>  | 35.09        | 35.30        | 31.39        | 33.24        | 32.40        | 33.71        | 31.24        | 33.61        |
| <b>3'</b>  | 47.51        | 47.28        | 44.68        | 45.56        | 46.38        | 46.35        | 46.50        | 46.37        |
| <b>4'</b>  | 34.66        | 34.50        | 33.53        | 33.22        | 34.50        | 33.94        | 33.72        | 34.27        |
| <b>5'</b>  | 49.33        | 48.95        | 50.27        | 49.23        | 50.58        | 50.34        | 49.47        | 50.62        |
| <b>6'</b>  | 44.50        | 44.58        | 42.96        | 41.45        | 46.61        | 46.04        | 46.10        | 46.29        |
| <b>1''</b> | -3.55        | -2.20        | -3.62        | -2.17        | -2.85        | -0.02        | -1.52        | -1.32        |
| <b>2''</b> | 128.14       | 127.92       | 128.27       | 128.58       | 128.10       | 127.99       | 128.57       | 127.86       |
|            | <b>7a-09</b> | <b>7a-10</b> | <b>7a-11</b> | <b>7a-12</b> | <b>7a-13</b> | <b>7a-14</b> | <b>7a-15</b> | <b>7a-16</b> |
| <b>1</b>   | 126.45       | 120.37       | 119.81       | 126.37       | 121.96       | 119.28       | 118.85       | 121.51       |
| <b>3</b>   | 123.59       | 120.11       | 120.45       | 120.43       | 124.00       | 124.55       | 123.40       | 121.04       |
| <b>4</b>   | 152.21       | 153.92       | 156.68       | 152.98       | 150.37       | 152.77       | 154.40       | 149.85       |
| <b>4a</b>  | 65.42        | 67.64        | 68.07        | 65.58        | 68.62        | 65.61        | 66.25        | 67.95        |
| <b>4b</b>  | 48.99        | 49.01        | 49.46        | 48.63        | 48.76        | 48.57        | 49.02        | 49.00        |
| <b>5</b>   | 59.36        | 60.44        | 60.34        | 59.88        | 60.45        | 58.48        | 59.51        | 60.41        |
| <b>6</b>   | 57.80        | 58.81        | 58.83        | 58.27        | 58.08        | 58.95        | 58.52        | 58.34        |
| <b>7</b>   | 55.53        | 56.51        | 56.58        | 55.72        | 55.93        | 56.51        | 56.52        | 55.99        |
| <b>8</b>   | 68.21        | 68.47        | 68.52        | 67.98        | 67.89        | 67.87        | 67.89        | 68.14        |
| <b>8a</b>  | 40.81        | 40.62        | 40.24        | 40.45        | 40.59        | 40.56        | 40.09        | 40.83        |
| <b>9a</b>  | 44.39        | 42.97        | 44.06        | 43.22        | 42.65        | 43.91        | 44.70        | 42.86        |
| <b>1'</b>  | 36.25        | 37.66        | 36.49        | 35.63        | 34.92        | 33.51        | 34.12        | 35.66        |
| <b>2'</b>  | 32.29        | 33.48        | 31.49        | 31.99        | 32.74        | 33.78        | 32.67        | 33.21        |
| <b>3'</b>  | 46.33        | 45.24        | 44.36        | 46.65        | 45.22        | 44.86        | 45.14        | 45.06        |
| <b>4'</b>  | 34.14        | 33.15        | 33.43        | 33.80        | 34.03        | 33.65        | 33.31        | 33.77        |
| <b>5'</b>  | 50.53        | 49.36        | 50.35        | 49.34        | 50.25        | 49.43        | 49.32        | 50.23        |
| <b>6'</b>  | 46.04        | 41.82        | 43.14        | 46.03        | 44.49        | 42.20        | 42.14        | 44.34        |
| <b>1''</b> | -0.06        | -1.40        | -2.49        | -1.11        | -3.64        | -1.62        | 0.18         | -0.39        |
| <b>2''</b> | 128.26       | 128.03       | 128.10       | 127.98       | 127.71       | 128.03       | 128.20       | 127.93       |

7a Shielding tensors mPW1PW91/6-311+G(2d,p)//B3LYP/6-31G(d) SCRF = (PCM, CHCl<sub>3</sub>)

|            | <b>7a-01</b> | <b>7a-02</b> | <b>7a-03</b> | <b>7a-04</b> | <b>7a-05</b> | <b>7a-06</b> | <b>7a-07</b> | <b>7a-08</b> |
|------------|--------------|--------------|--------------|--------------|--------------|--------------|--------------|--------------|
| <b>1</b>   | 132.80       | 131.75       | 126.78       | 127.34       | 132.65       | 130.28       | 131.74       | 130.57       |
| <b>3</b>   | 126.85       | 126.25       | 127.08       | 127.90       | 132.63       | 132.55       | 127.89       | 132.68       |
| <b>4</b>   | 160.03       | 160.80       | 160.66       | 157.65       | 157.10       | 159.10       | 157.01       | 158.17       |
| <b>4a</b>  | 75.86        | 74.80        | 74.25        | 74.46        | 70.14        | 69.93        | 72.23        | 69.50        |
| <b>4b</b>  | 55.38        | 55.49        | 55.38        | 54.77        | 54.71        | 55.03        | 54.72        | 54.77        |
| <b>5</b>   | 64.32        | 64.51        | 64.93        | 65.09        | 64.07        | 63.40        | 64.61        | 64.11        |
| <b>6</b>   | 63.60        | 63.64        | 63.58        | 63.54        | 62.41        | 63.11        | 63.09        | 62.64        |
| <b>7</b>   | 60.93        | 61.00        | 61.07        | 61.10        | 59.84        | 60.33        | 60.35        | 60.01        |
| <b>8</b>   | 72.39        | 72.93        | 72.52        | 72.49        | 72.55        | 71.47        | 72.09        | 72.37        |
| <b>8a</b>  | 46.44        | 45.65        | 46.17        | 46.61        | 46.26        | 45.79        | 46.09        | 45.76        |
| <b>9a</b>  | 47.75        | 48.48        | 48.99        | 47.76        | 50.07        | 50.89        | 48.07        | 49.43        |
| <b>1'</b>  | 39.48        | 39.73        | 42.00        | 43.19        | 41.03        | 41.95        | 40.88        | 41.89        |
| <b>2'</b>  | 40.99        | 41.16        | 37.16        | 38.98        | 38.38        | 39.68        | 37.18        | 39.57        |
| <b>3'</b>  | 52.17        | 51.92        | 49.40        | 50.27        | 51.09        | 51.09        | 51.15        | 51.10        |
| <b>4'</b>  | 40.51        | 40.31        | 39.32        | 39.01        | 40.30        | 39.89        | 39.48        | 40.07        |
| <b>5'</b>  | 53.83        | 53.49        | 54.81        | 53.79        | 55.06        | 54.80        | 54.00        | 55.06        |
| <b>6'</b>  | 49.00        | 49.07        | 47.35        | 45.83        | 50.92        | 50.47        | 50.50        | 50.62        |
| <b>1''</b> | 1.91         | 3.24         | 1.80         | 3.33         | 2.61         | 5.39         | 3.96         | 4.13         |
| <b>2''</b> | 132.74       | 132.55       | 132.89       | 133.25       | 132.76       | 132.62       | 133.24       | 132.50       |
|            | <b>7a-09</b> | <b>7a-10</b> | <b>7a-11</b> | <b>7a-12</b> | <b>7a-13</b> | <b>7a-14</b> | <b>7a-15</b> | <b>7a-16</b> |
| <b>1</b>   | 132.00       | 126.19       | 125.64       | 131.83       | 127.64       | 125.16       | 124.75       | 127.25       |
| <b>3</b>   | 129.79       | 126.10       | 126.33       | 126.36       | 129.91       | 130.27       | 129.19       | 127.15       |
| <b>4</b>   | 157.65       | 159.26       | 161.82       | 158.42       | 155.77       | 158.06       | 159.66       | 155.23       |
| <b>4a</b>  | 70.61        | 72.98        | 73.30        | 70.82        | 73.80        | 71.15        | 71.71        | 73.24        |
| <b>4b</b>  | 54.52        | 54.55        | 54.92        | 54.25        | 54.41        | 54.20        | 54.60        | 54.58        |
| <b>5</b>   | 63.45        | 64.48        | 64.41        | 63.91        | 64.52        | 62.84        | 63.64        | 64.50        |
| <b>6</b>   | 62.26        | 63.30        | 63.31        | 62.76        | 62.58        | 63.41        | 62.97        | 62.88        |
| <b>7</b>   | 59.81        | 60.85        | 60.92        | 60.01        | 60.31        | 60.85        | 60.83        | 60.38        |
| <b>8</b>   | 72.35        | 72.61        | 72.64        | 72.04        | 72.02        | 71.91        | 71.96        | 72.21        |
| <b>8a</b>  | 46.33        | 46.25        | 45.86        | 46.01        | 46.19        | 45.82        | 45.57        | 46.33        |
| <b>9a</b>  | 49.73        | 48.28        | 49.33        | 48.52        | 48.08        | 49.03        | 49.83        | 48.23        |
| <b>1'</b>  | 41.94        | 43.63        | 42.47        | 41.52        | 40.76        | 39.51        | 40.02        | 41.44        |
| <b>2'</b>  | 38.28        | 39.25        | 37.31        | 37.81        | 38.57        | 39.52        | 38.48        | 38.92        |
| <b>3'</b>  | 51.07        | 49.93        | 49.07        | 51.32        | 49.87        | 49.54        | 49.84        | 49.79        |
| <b>4'</b>  | 40.02        | 38.97        | 39.23        | 39.49        | 39.75        | 39.38        | 39.12        | 39.49        |
| <b>5'</b>  | 55.01        | 53.93        | 54.91        | 53.85        | 54.77        | 53.87        | 53.86        | 54.78        |
| <b>6'</b>  | 50.41        | 46.27        | 47.58        | 50.45        | 48.89        | 46.67        | 46.68        | 48.74        |
| <b>1''</b> | 5.43         | 4.06         | 3.02         | 4.33         | 1.87         | 3.81         | 5.60         | 5.13         |
| <b>2''</b> | 132.89       | 132.65       | 132.70       | 132.61       | 132.36       | 132.65       | 132.83       | 132.58       |

**7b-01**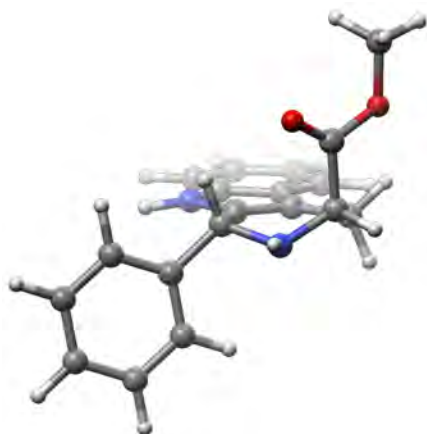

|   |             |             |             |   |             |             |             |
|---|-------------|-------------|-------------|---|-------------|-------------|-------------|
| C | 0.00000000  | 0.00000000  | 0.00000000  | H | 2.73647700  | 2.91870800  | -2.40701100 |
| C | -0.35177300 | -1.15697200 | -0.88553800 | H | 1.25330100  | 3.89357400  | -2.68224500 |
| C | 0.33330000  | -2.39644100 | -1.14633500 | H | -2.78659200 | 1.70844600  | -0.74917300 |
| C | 1.53770500  | -2.96670900 | -0.70219900 | H | -2.42955400 | 0.42595500  | -2.67088500 |
| H | 2.17396600  | -2.43285000 | -0.00061600 | C | -3.95334000 | -0.59902800 | -1.58490200 |
| C | 1.90365400  | -4.22399600 | -1.16923900 | C | -4.76717100 | -0.65732900 | -2.72136400 |
| C | 1.08749500  | -4.92837800 | -2.07649100 | C | -6.06206400 | -1.17902400 | -2.64560300 |
| C | -0.10861500 | -4.38830700 | -2.53927100 | C | -6.55574700 | -1.64168000 | -1.42644700 |
| C | -0.47263800 | -3.12363400 | -2.06956800 | C | -5.75049100 | -1.57987600 | -0.28461400 |
| N | -1.57793100 | -2.34368300 | -2.35797900 | C | -4.45831600 | -1.06457100 | -0.36306200 |
| H | -2.39035000 | -2.64124500 | -2.87718700 | H | -3.82969400 | -1.00359700 | 0.51981500  |
| C | -1.50549300 | -1.17418600 | -1.62408500 | H | -6.13270900 | -1.93521700 | 0.66896900  |
| C | -2.52566100 | -0.07226500 | -1.69143100 | H | -7.56363300 | -2.04332700 | -1.36243800 |
| N | -2.24086600 | 0.86548700  | -0.58457200 | H | -6.68416600 | -1.21333200 | -3.53626400 |
| C | -0.83456800 | 1.23235500  | -0.41124600 | H | -4.38988100 | -0.27963700 | -3.66984700 |
| H | -0.79518200 | 1.95836100  | 0.41299000  | H | -0.73565500 | -4.93152700 | -3.24178000 |
| C | -0.26461200 | 1.98060300  | -1.63154500 | H | 1.39752600  | -5.91046000 | -2.42322200 |
| O | -0.94041300 | 2.43156300  | -2.53376000 | H | 2.83285000  | -4.67418400 | -0.83027400 |
| O | 1.07169000  | 2.14416100  | -1.55395600 | H | 1.06494400  | 0.24611900  | -0.05406100 |
| C | 1.67041100  | 2.88431800  | -2.63265500 | H | -0.22302000 | -0.22871600 | 1.05107500  |
| H | 1.49475400  | 2.37883100  | -3.58559000 |   |             |             |             |

## 7b-02

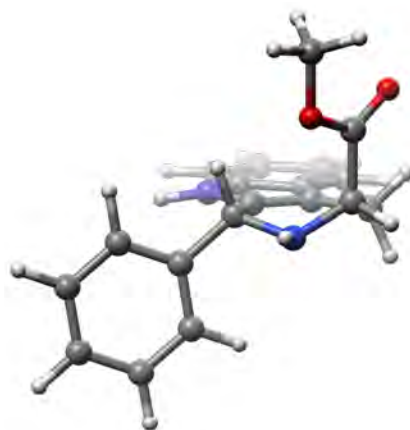

|   |             |             |             |   |             |             |             |
|---|-------------|-------------|-------------|---|-------------|-------------|-------------|
| C | 0.0000000   | 0.0000000   | 0.0000000   | H | -3.12795700 | 3.01318500  | -3.64956700 |
| C | 0.13120700  | -1.17181800 | -0.92644500 | H | -1.38789900 | 2.67395600  | -3.93765700 |
| C | 1.26635400  | -1.99371600 | -1.25868600 | H | -3.29428900 | 0.34121100  | -0.55646200 |
| C | 2.61471700  | -2.01227700 | -0.86522700 | H | -2.48940800 | -0.55724500 | -2.58964700 |
| H | 2.99164100  | -1.27878700 | -0.15694100 | C | -3.39322200 | -2.17661800 | -1.54054600 |
| C | 3.45974000  | -2.98175700 | -1.39290100 | C | -4.14880400 | -2.52136400 | -2.66621300 |
| C | 2.98449100  | -3.93848600 | -2.31179300 | C | -5.10167500 | -3.54236800 | -2.60084600 |
| C | 1.65633700  | -3.94185300 | -2.72674500 | C | -5.30993700 | -4.22392000 | -1.40238900 |
| C | 0.81024000  | -2.96452600 | -2.19622000 | C | -4.56204900 | -3.88104600 | -0.27142900 |
| N | -0.53078400 | -2.71775000 | -2.42976700 | C | -3.60876300 | -2.86700200 | -0.33992700 |
| H | -1.16104100 | -3.32514900 | -2.93175400 | H | -3.02964900 | -2.58774200 | 0.53467900  |
| C | -0.93271900 | -1.65410400 | -1.64161500 | H | -4.72327000 | -4.40729800 | 0.66591600  |
| C | -2.32643000 | -1.08996300 | -1.63437700 | H | -6.05314400 | -5.01488900 | -1.34610200 |
| N | -2.42271100 | -0.17673800 | -0.48142800 | H | -5.68407400 | -3.79595500 | -3.48285100 |
| C | -1.30631400 | 0.75693200  | -0.31034700 | H | -3.99940400 | -1.97927200 | -3.59826000 |
| H | -1.55765800 | 1.38082400  | 0.55906800  | H | 1.29207400  | -4.67829100 | -3.43868400 |
| C | -1.09031600 | 1.76806200  | -1.45638200 | H | 3.66732800  | -4.68611900 | -2.70631300 |
| O | -0.05985200 | 2.36505100  | -1.67523700 | H | 4.50419400  | -3.00511500 | -1.09379300 |
| O | -2.23059500 | 1.97734300  | -2.15815100 | H | 0.84050500  | 0.69361000  | -0.10326500 |
| C | -2.13672200 | 2.96728900  | -3.19753800 | H | -0.02560800 | -0.32895500 | 1.04754000  |
| H | -1.85852500 | 3.93744800  | -2.77764400 |   |             |             |             |

## 7b-03

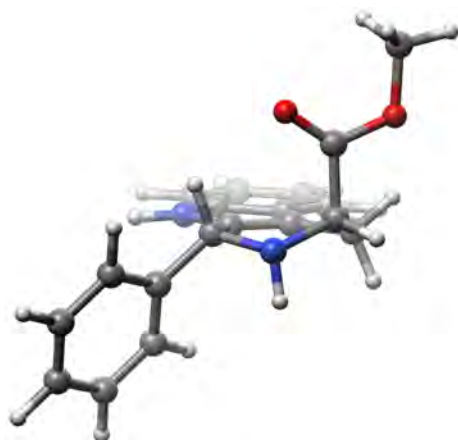

|   |             |             |             |   |             |             |             |
|---|-------------|-------------|-------------|---|-------------|-------------|-------------|
| C | 0.00000000  | 0.00000000  | 0.00000000  | H | 2.35120900  | 3.60810100  | -1.93559000 |
| C | -0.22307800 | -1.18748800 | -0.88906400 | H | 0.78189300  | 4.05713400  | -2.68356400 |
| C | 0.61418000  | -2.32744000 | -1.16093100 | H | -2.72915700 | 0.37617100  | 0.17469200  |
| C | 1.87246200  | -2.75488500 | -0.70495100 | H | -2.42716900 | 0.17320400  | -2.69861400 |
| H | 2.42702800  | -2.16199200 | 0.01829900  | C | -3.87380600 | -0.94957000 | -1.60437200 |
| C | 2.39772500  | -3.94783100 | -1.18819400 | C | -4.94103700 | -0.40570000 | -2.33008900 |
| C | 1.68913800  | -4.72855900 | -2.12308100 | C | -6.22892700 | -0.92562700 | -2.20046400 |
| C | 0.44290900  | -4.33039200 | -2.59707900 | C | -6.46734500 | -1.99833500 | -1.33843500 |
| C | -0.08062000 | -3.12894400 | -2.11192900 | C | -5.41187200 | -2.54533900 | -0.60694400 |
| N | -1.27097700 | -2.48775700 | -2.40036800 | C | -4.12354200 | -2.02360300 | -0.73931500 |
| H | -2.01374700 | -2.85739500 | -2.97396400 | H | -3.30245200 | -2.45760700 | -0.17381200 |
| C | -1.36008000 | -1.33109100 | -1.64445100 | H | -5.58926800 | -3.38089100 | 0.06524900  |
| C | -2.48581200 | -0.33422000 | -1.72829000 | H | -7.46965100 | -2.40659800 | -1.23909800 |
| N | -2.33269600 | 0.72333500  | -0.69713100 | H | -7.04603600 | -0.49416200 | -2.77269400 |
| C | -0.95652600 | 1.15213400  | -0.42856200 | H | -4.75604500 | 0.43415700  | -2.99522300 |
| H | -1.00629500 | 1.87853400  | 0.39198100  | H | -0.10123200 | -4.93218400 | -3.32067100 |
| C | -0.39897100 | 1.92264100  | -1.62768800 | H | 2.12371700  | -5.65747800 | -2.48231000 |
| O | -0.91740100 | 2.04243100  | -2.71528600 | H | 3.36980300  | -4.28723500 | -0.84056000 |
| O | 0.78911300  | 2.48573800  | -1.30756800 | H | 1.03958200  | 0.34469100  | -0.03551300 |
| C | 1.42105100  | 3.23077400  | -2.36146300 | H | -0.20536800 | -0.24503100 | 1.05312300  |
| H | 1.62489900  | 2.58430600  | -3.21909800 |   |             |             |             |



7b-04

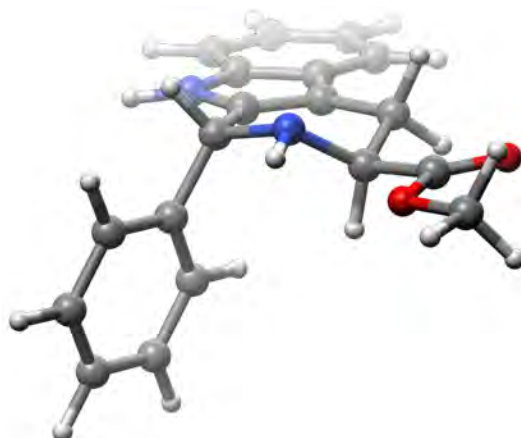

|   |             |             |             |   |             |             |             |
|---|-------------|-------------|-------------|---|-------------|-------------|-------------|
| C | 0.00000000  | 0.00000000  | 0.00000000  | H | 5.66775200  | -0.47233400 | -0.45678900 |
| C | -0.97204100 | 1.10240200  | -0.29897100 | H | 4.57806900  | -1.84783000 | -0.83777800 |
| C | -2.39391400 | 1.19386100  | -0.08783900 | H | 2.61454400  | 1.63512300  | -1.28132600 |
| C | -3.36389500 | 0.33268200  | 0.45181700  | H | 0.82530100  | 2.93136900  | -2.33941000 |
| H | -3.08413700 | -0.65316900 | 0.81448400  | C | 1.42134800  | 3.80090500  | -0.48599400 |
| C | -4.68560200 | 0.75827600  | 0.51511600  | C | 2.36662800  | 4.63044000  | -1.10645000 |
| C | -5.06263800 | 2.03295900  | 0.04704500  | C | 2.99166300  | 5.65965600  | -0.40240700 |
| C | -4.12657000 | 2.90763100  | -0.49548600 | C | 2.67613300  | 5.87809600  | 0.94025900  |
| C | -2.79876500 | 2.47599600  | -0.55859200 | C | 1.73006600  | 5.06560600  | 1.56721400  |
| N | -1.67131500 | 3.11324100  | -1.04329200 | C | 1.10446000  | 4.03730200  | 0.85948300  |
| H | -1.63263700 | 4.06502400  | -1.37408400 | H | 0.35283800  | 3.42383200  | 1.34831200  |
| C | -0.57725500 | 2.28053800  | -0.87698200 | H | 1.47181700  | 5.23557300  | 2.60928600  |
| C | 0.82180800  | 2.63362800  | -1.28005700 | H | 3.15827700  | 6.68111900  | 1.49128600  |
| N | 1.62953300  | 1.39159300  | -1.21331400 | H | 3.71881400  | 6.29409000  | -0.90263800 |
| C | 1.42029700  | 0.58765300  | -0.00063900 | H | 2.61241900  | 4.46786700  | -2.15465100 |
| H | 1.54922300  | 1.18701400  | 0.92331900  | H | -4.41929200 | 3.88983400  | -0.85807700 |
| C | 2.47143200  | -0.51355900 | 0.08438200  | H | -6.10343800 | 2.33891700  | 0.10958900  |
| O | 2.26451200  | -1.65024300 | 0.44530400  | H | -5.44317200 | 0.09945000  | 0.93087800  |
| O | 3.69944800  | -0.04900800 | -0.24466600 | H | -0.05765100 | -0.80195300 | -0.74727000 |
| C | 4.76596700  | -1.00959400 | -0.16198600 | H | -0.19926100 | -0.46460600 | 0.97218800  |
| H | 4.85949700  | -1.38932900 | 0.85870800  |   |             |             |             |

7b-05

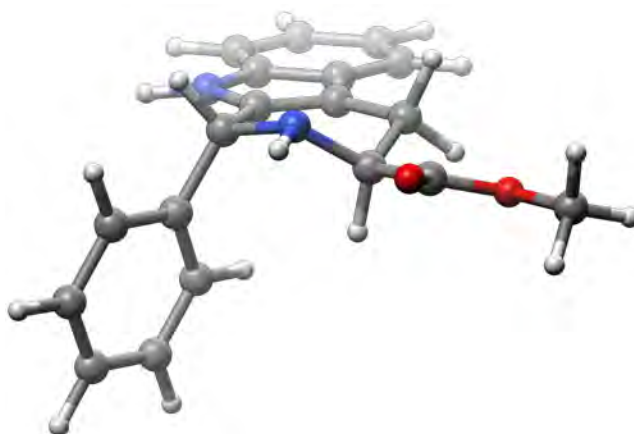

|   |             |             |             |   |             |             |             |
|---|-------------|-------------|-------------|---|-------------|-------------|-------------|
| C | 0.00000000  | 0.00000000  | 0.00000000  | H | -2.93546500 | 3.25129400  | 1.45498300  |
| C | 0.98786000  | -1.11538500 | -0.18732600 | H | -4.23118100 | 2.03343700  | 1.20344200  |
| C | 2.40179300  | -1.17936200 | 0.07912500  | H | -2.54720200 | -1.69361000 | -1.31130900 |
| C | 3.34856600  | -0.27238700 | 0.58391900  | H | -0.72913800 | -3.10924300 | -2.14214100 |
| H | 3.05207200  | 0.73659700  | 0.85951500  | C | -1.39303800 | -3.83418400 | -0.24934200 |
| C | 4.66913000  | -0.68211600 | 0.72628000  | C | -2.33136000 | -4.69825800 | -0.83182900 |
| C | 5.06802700  | -1.98656300 | 0.37225000  | C | -2.98040800 | -5.67145500 | -0.07236400 |
| C | 4.15537200  | -2.90723800 | -0.13282200 | C | -2.69650200 | -5.79829800 | 1.28913000  |
| C | 2.82871100  | -2.49150500 | -0.27559000 | C | -1.75820200 | -4.95042500 | 1.87944300  |
| N | 1.72145200  | -3.17283800 | -0.74632200 | C | -1.10853000 | -3.97810900 | 1.11608300  |
| H | 1.70011900  | -4.14589800 | -1.01017500 | H | -0.36333200 | -3.33652000 | 1.57813800  |
| C | 0.61843500  | -2.33867700 | -0.68483000 | H | -1.52495500 | -5.04870800 | 2.93658000  |
| C | -0.76586500 | -2.72932700 | -1.11009600 | H | -3.19792300 | -6.55737300 | 1.88353600  |
| N | -1.56163500 | -1.48677100 | -1.16712400 | H | -3.70262000 | -6.33313800 | -0.54353900 |
| C | -1.41557300 | -0.61123400 | -0.00654400 | H | -2.55442800 | -4.60610400 | -1.89353400 |
| H | -1.55046800 | -1.14844400 | 0.95464600  | H | 4.46496500  | -3.91261400 | -0.40710400 |
| C | -2.54235500 | 0.41230200  | -0.04604600 | H | 6.10724600  | -2.27947900 | 0.49461500  |
| O | -3.58223600 | 0.26499300  | -0.65298800 | H | 5.40858700  | 0.01225400  | 1.11603300  |
| O | -2.27299600 | 1.48390400  | 0.72537300  | H | 0.07993100  | 0.74222200  | -0.80616600 |
| C | -3.31633900 | 2.47120700  | 0.79542600  | H | 0.16759200  | 0.53192200  | 0.94285700  |
| H | -3.52776500 | 2.87541100  | -0.19781900 |   |             |             |             |

7b-06

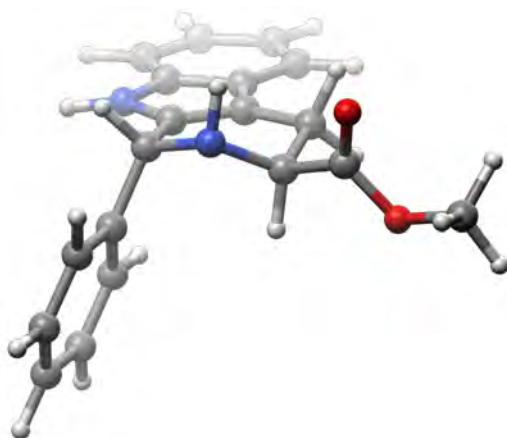

|   |             |             |             |   |             |             |             |
|---|-------------|-------------|-------------|---|-------------|-------------|-------------|
| C | 0.00000000  | 0.00000000  | 0.00000000  | H | 4.03957200  | -2.24092800 | 1.89686300  |
| C | -1.03706400 | 1.04966500  | -0.27049600 | H | 4.69118400  | -1.77657700 | 0.28978600  |
| C | -2.45681700 | 1.04695600  | -0.02761900 | H | 1.40355300  | 0.94986100  | -2.17191500 |
| C | -3.35527900 | 0.12586400  | 0.53651700  | H | 0.59461800  | 3.01647700  | -2.34710800 |
| H | -3.00236800 | -0.83583800 | 0.90040300  | C | 1.26230400  | 3.80249500  | -0.48182600 |
| C | -4.70123400 | 0.46137200  | 0.62426700  | C | 2.46808900  | 4.36492900  | -0.92559100 |
| C | -5.17286200 | 1.70431900  | 0.15670800  | C | 3.07482000  | 5.39994500  | -0.21904200 |
| C | -4.30901900 | 2.63659800  | -0.40927700 | C | 2.48609700  | 5.88912200  | 0.95140900  |
| C | -2.95641300 | 2.29562700  | -0.49635900 | C | 1.29252700  | 5.33156300  | 1.40548100  |
| N | -1.88333600 | 3.00377500  | -1.00644800 | C | 0.68359100  | 4.29354800  | 0.69228400  |
| H | -1.91898600 | 3.94838000  | -1.35777700 | H | -0.24366600 | 3.86303600  | 1.05851700  |
| C | -0.73065800 | 2.24769100  | -0.86337000 | H | 0.83053200  | 5.69908000  | 2.31819400  |
| C | 0.64528100  | 2.66384000  | -1.30652000 | H | 2.95816200  | 6.69709700  | 1.50418600  |
| N | 1.55704400  | 1.50266800  | -1.33030600 | H | 4.00818200  | 5.82569600  | -0.57847400 |
| C | 1.42024500  | 0.62146900  | -0.16860300 | H | 2.93470800  | 3.97032000  | -1.82436800 |
| H | 1.65596400  | 1.20487900  | 0.72695500  | H | -4.67487700 | 3.59418500  | -0.77120400 |
| C | 2.43422500  | -0.50209600 | -0.31083800 | H | -6.23045600 | 1.93979500  | 0.23881500  |
| O | 2.75556000  | -1.00509600 | -1.36635000 | H | -5.40399700 | -0.24389400 | 1.05957500  |
| O | 2.88476600  | -0.91783900 | 0.89012200  | H | -0.11247400 | -0.84704100 | -0.69389900 |
| C | 3.79195000  | -2.03347500 | 0.85556100  | H | -0.09650600 | -0.41250400 | 1.01283000  |
| H | 3.31597700  | -2.90143000 | 0.39157700  |   |             |             |             |

7b-07

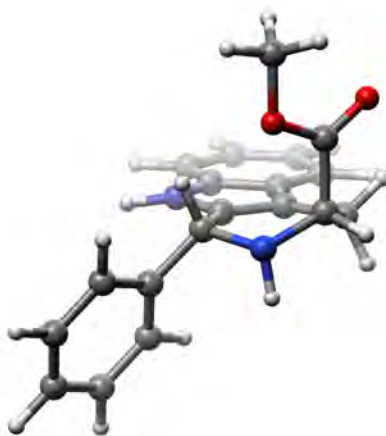

|   |             |             |             |   |             |             |             |
|---|-------------|-------------|-------------|---|-------------|-------------|-------------|
| C | 0.00000000  | 0.00000000  | 0.00000000  | H | -2.55066100 | 2.99367200  | -3.99485500 |
| C | 0.14282400  | -1.13167400 | -0.97504200 | H | -0.77090400 | 2.76213000  | -3.90892100 |
| C | 1.29021800  | -1.92817200 | -1.32793800 | H | -2.71070200 | -0.51669600 | 0.18950700  |
| C | 2.62689700  | -1.96863200 | -0.89778800 | H | -2.42664400 | -0.41944600 | -2.69073500 |
| H | 2.97963100  | -1.28224200 | -0.13221200 | C | -3.40887000 | -2.01122600 | -1.67574700 |
| C | 3.49130000  | -2.89838500 | -1.46389100 | C | -4.61929200 | -1.77360300 | -2.33880400 |
| C | 3.04692900  | -3.79366000 | -2.45734800 | C | -5.67411900 | -2.68116400 | -2.24389400 |
| C | 1.73102500  | -3.77421100 | -2.90901200 | C | -5.53223900 | -3.84154300 | -1.47959800 |
| C | 0.86569300  | -2.83569500 | -2.34006600 | C | -4.33201100 | -4.08593200 | -0.81041600 |
| N | -0.47001600 | -2.57931600 | -2.59100000 | C | -3.27725700 | -3.17609700 | -0.90796900 |
| H | -1.07295000 | -3.13558200 | -3.17787200 | H | -2.34185100 | -3.37366500 | -0.39020700 |
| C | -0.90377000 | -1.56898000 | -1.74739800 | H | -4.21371800 | -4.98643800 | -0.21341400 |
| C | -2.28952700 | -0.97967300 | -1.75547200 | H | -6.35207200 | -4.55124400 | -1.40728000 |
| N | -2.45553900 | -0.00336500 | -0.65237200 | H | -6.60628300 | -2.48323800 | -2.76654200 |
| C | -1.27552400 | 0.81315700  | -0.34533300 | H | -4.73242200 | -0.86620500 | -2.92704600 |
| H | -1.54616000 | 1.41965300  | 0.52993200  | H | 1.39090200  | -4.46287900 | -3.67839700 |
| C | -0.95233400 | 1.84990900  | -1.43031700 | H | 3.74456400  | -4.51097700 | -2.88117000 |
| O | 0.06922700  | 2.50371800  | -1.43522000 | H | 4.52700500  | -2.93821300 | -1.13748500 |
| O | -1.92997500 | 2.00030900  | -2.34514400 | H | 0.86766300  | 0.66763300  | -0.02389100 |
| C | -1.67559100 | 3.00275400  | -3.34439200 | H | -0.08503400 | -0.37128100 | 1.03224300  |
| H | -1.55179600 | 3.98399000  | -2.87895300 |   |             |             |             |

7b-08

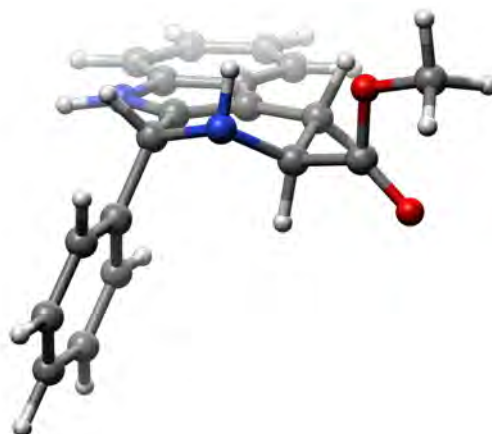

|   |             |             |             |   |             |             |             |
|---|-------------|-------------|-------------|---|-------------|-------------|-------------|
| C | 0.00000000  | 0.00000000  | 0.00000000  | H | 3.64273500  | -2.70779800 | -1.99060500 |
| C | -1.00694500 | 1.00880100  | -0.47067000 | H | 3.29646400  | -2.99600800 | -0.25233800 |
| C | -2.43969900 | 1.04015900  | -0.32644500 | H | 1.49964700  | 0.66498100  | -2.16591400 |
| C | -3.38429900 | 0.19492100  | 0.27958300  | H | 0.78174700  | 2.71081800  | -2.64891200 |
| H | -3.06717100 | -0.71799800 | 0.77737600  | C | 1.33633600  | 3.70865200  | -0.85017900 |
| C | -4.72914500 | 0.54308000  | 0.23589700  | C | 2.55216500  | 4.23845800  | -1.30608000 |
| C | -5.15404800 | 1.72407700  | -0.40500000 | C | 3.12496900  | 5.34561500  | -0.68578200 |
| C | -4.24369200 | 2.58054700  | -1.01602400 | C | 2.49073400  | 5.94152400  | 0.40881700  |
| C | -2.89218500 | 2.22719700  | -0.97047400 | C | 1.28604000  | 5.41845900  | 0.87442100  |
| N | -1.77915400 | 2.86702200  | -1.48539200 | C | 0.71135100  | 4.30790600  | 0.24777400  |
| H | -1.77940900 | 3.76666100  | -1.94107300 | H | -0.22567100 | 3.90589800  | 0.62188100  |
| C | -0.64757000 | 2.12894400  | -1.17635700 | H | 0.78891400  | 5.86974800  | 1.72918100  |
| C | 0.75928900  | 2.48527000  | -1.57264500 | H | 2.93645200  | 6.80545300  | 0.89471500  |
| N | 1.65372800  | 1.31837500  | -1.39953800 | H | 4.06717400  | 5.74430300  | -1.05294100 |
| C | 1.42723900  | 0.60649200  | -0.13308900 | H | 3.05389700  | 3.76345200  | -2.14527000 |
| H | 1.58181800  | 1.32250200  | 0.67928800  | H | -4.57366000 | 3.49061500  | -1.51071200 |
| C | 2.47295800  | -0.48231500 | 0.05625300  | H | -6.21196500 | 1.97145800  | -0.42269600 |
| O | 3.03559000  | -0.73302500 | 1.09820500  | H | -5.46745000 | -0.10331600 | 0.70258100  |
| O | 2.65834900  | -1.18911500 | -1.08343600 | H | -0.06283800 | -0.92542300 | -0.59202500 |
| C | 3.61250500  | -2.26033700 | -0.99668300 | H | -0.17526600 | -0.28676900 | 1.04527200  |
| H | 4.59627400  | -1.87364400 | -0.71855300 |   |             |             |             |

7b Shielding tensors B3LYP/6-311+G(2d,p)//B3LYP/6-31G(d) SCRF = (PCM, CHCl<sub>3</sub>)

|            | <b>7b-01</b> | <b>7b-02</b> | <b>7b-03</b> | <b>7b-04</b> | <b>7b-05</b> | <b>7b-06</b> | <b>7b-07</b> | <b>7b-08</b> |
|------------|--------------|--------------|--------------|--------------|--------------|--------------|--------------|--------------|
| <b>1</b>   | 122.3475     | 121.5511     | 122.7069     | 119.6161     | 120.1419     | 122.755      | 122.5338     | 122.175      |
| <b>3</b>   | 121.2533     | 120.4276     | 121.9359     | 126.7257     | 127.3429     | 126.6166     | 120.5222     | 123.7218     |
| <b>4</b>   | 155.3685     | 156.0723     | 152.0397     | 154.1438     | 153.0938     | 151.5335     | 152.8969     | 152.1903     |
| <b>4a</b>  | 71.8384      | 70.1304      | 68.6232      | 65.8282      | 65.3758      | 66.6313      | 65.8549      | 66.4389      |
| <b>4b</b>  | 49.1992      | 48.328       | 48.7876      | 48.8445      | 48.6932      | 48.1878      | 48.5593      | 48.3412      |
| <b>5</b>   | 60.5605      | 59.936       | 60.7871      | 60.0991      | 59.7792      | 60.4575      | 60.4009      | 60.2128      |
| <b>6</b>   | 58.6485      | 59.0539      | 58.5199      | 58.4475      | 58.1558      | 58.1963      | 58.9981      | 58.5605      |
| <b>7</b>   | 56.713       | 56.7449      | 56.3189      | 56.2739      | 56.6245      | 55.9383      | 56.1866      | 55.8271      |
| <b>8</b>   | 68.3444      | 68.2327      | 68.0123      | 68.0532      | 67.514       | 68.0986      | 68.2646      | 68.0736      |
| <b>8a</b>  | 40.4074      | 39.9568      | 41.0802      | 39.6633      | 40.1078      | 40.2491      | 40.1538      | 40.5912      |
| <b>9a</b>  | 40.3515      | 40.5757      | 41.4741      | 43.3677      | 42.9563      | 41.8454      | 41.5906      | 41.9793      |
| <b>1'</b>  | 30.6007      | 31.324       | 30.5434      | 30.973       | 31.1831      | 29.7556      | 32.9739      | 29.899       |
| <b>2'</b>  | 48.1048      | 48.1138      | 44.5239      | 47.9987      | 47.8017      | 45.3906      | 45.7357      | 45.3525      |
| <b>3'</b>  | 48.8392      | 49.3104      | 48.0471      | 47.6028      | 47.7613      | 48.5581      | 48.8678      | 48.2141      |
| <b>4'</b>  | 49.063       | 49.0079      | 48.9444      | 49.1302      | 49.2594      | 50.1694      | 48.6853      | 50.103       |
| <b>5'</b>  | 48.0278      | 48.1371      | 48.2187      | 48.832       | 49.0687      | 49.7995      | 48.747       | 49.5583      |
| <b>6'</b>  | 47.8521      | 47.4484      | 50.5145      | 49.4939      | 49.6667      | 49.9         | 49.0562      | 49.6496      |
| <b>1''</b> | -3.4409      | -2.5902      | -1.6735      | -0.3724      | -1.5255      | -3.4342      | -1.491       | -0.6233      |
| <b>2''</b> | 128.3693     | 128.0755     | 128.7087     | 128.071      | 128.0803     | 128.2265     | 128.1948     | 128.2969     |

7b Shielding tensors mPW1PW91/6-311+G(2d,p)//B3LYP/6-31G(d) SCRF = (PCM, CHCl<sub>3</sub>)

|            | <b>7b-01</b> | <b>7b-02</b> | <b>7b-03</b> | <b>7b-04</b> | <b>7b-05</b> | <b>7b-06</b> | <b>7b-07</b> | <b>7b-08</b> |
|------------|--------------|--------------|--------------|--------------|--------------|--------------|--------------|--------------|
| <b>1</b>   | 128.0079     | 127.2749     | 128.4267     | 128.5594     | 125.554      | 126.0445     | 128.177      | 127.9535     |
| <b>3</b>   | 127.1486     | 126.2765     | 127.8764     | 132.4641     | 132.2988     | 132.8862     | 126.3669     | 129.8368     |
| <b>4</b>   | 160.5948     | 161.2546     | 157.485      | 156.9403     | 159.4594     | 158.3741     | 158.2906     | 157.6138     |
| <b>4a</b>  | 76.9614      | 75.4322      | 73.7343      | 71.9052      | 71.0478      | 70.5736      | 71.1759      | 71.714       |
| <b>4b</b>  | 54.6608      | 53.9213      | 54.3041      | 53.7993      | 54.4664      | 54.3095      | 54.1132      | 53.9783      |
| <b>5</b>   | 64.6167      | 63.985       | 64.7442      | 64.3298      | 63.9627      | 63.7572      | 64.4148      | 64.119       |
| <b>6</b>   | 63.1199      | 63.5389      | 62.9865      | 62.6456      | 62.8783      | 62.5734      | 63.4854      | 63.0257      |
| <b>7</b>   | 61.0757      | 61.1651      | 60.6586      | 60.3032      | 60.6063      | 60.8676      | 60.6253      | 60.2086      |
| <b>8</b>   | 72.5197      | 72.2675      | 72.1514      | 72.2421      | 72.208       | 71.7386      | 72.3439      | 72.1897      |
| <b>8a</b>  | 46.008       | 45.5638      | 46.6914      | 45.9564      | 45.3381      | 45.685       | 45.7572      | 46.2331      |
| <b>9a</b>  | 45.6713      | 45.9098      | 46.7037      | 47.356       | 48.6639      | 48.198       | 46.9352      | 47.4105      |
| <b>1'</b>  | 36.5372      | 37.2917      | 36.4822      | 35.5826      | 36.7399      | 36.9346      | 39.0455      | 35.7134      |
| <b>2'</b>  | 52.5494      | 52.6179      | 49.0568      | 50.0225      | 52.5119      | 52.3365      | 50.2603      | 49.9208      |
| <b>3'</b>  | 53.2421      | 53.7024      | 52.4797      | 52.9278      | 52.108       | 52.2578      | 53.2641      | 52.5803      |
| <b>4'</b>  | 53.414       | 53.3373      | 53.2925      | 54.4485      | 53.5224      | 53.6572      | 52.9964      | 54.3427      |
| <b>5'</b>  | 52.4362      | 52.4815      | 52.631       | 54.1058      | 53.1788      | 53.4293      | 53.0947      | 53.8657      |
| <b>6'</b>  | 52.3442      | 51.8815      | 54.8084      | 54.3645      | 54.0421      | 54.1774      | 53.5245      | 54.102       |
| <b>1''</b> | 1.983        | 2.8499       | 3.7839       | 2.1064       | 5.0771       | 3.9087       | 3.9016       | 4.8793       |
| <b>2''</b> | 132.9791     | 132.7181     | 133.3643     | 132.8904     | 132.72       | 132.7085     | 132.8235     | 132.9491     |

**8a-01**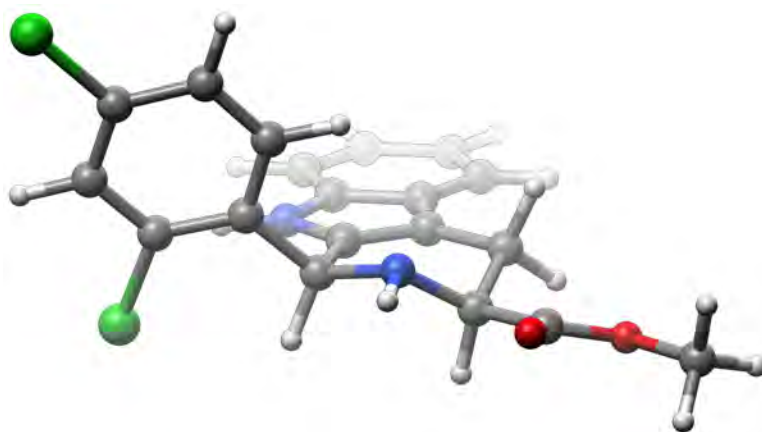

|   |             |             |             |    |             |             |             |
|---|-------------|-------------|-------------|----|-------------|-------------|-------------|
| C | 0.00000000  | 0.00000000  | 0.00000000  | H  | -1.75776200 | -4.40005800 | 1.06024600  |
| C | 0.80104600  | 1.24462800  | 0.24993500  | H  | -1.51805800 | -4.24305400 | -0.69672200 |
| C | 0.47780800  | 2.63160800  | 0.04233700  | H  | -2.98212000 | -3.53863800 | 0.06790700  |
| C | -0.63483600 | 3.31409800  | -0.47821400 | H  | 2.41700900  | -2.06506700 | 0.98355800  |
| H | -1.49971100 | 2.76342200  | -0.83963800 | C  | 4.23441600  | -0.06299700 | 0.67641200  |
| C | -0.61362400 | 4.70269800  | -0.52624300 | C  | 5.32512500  | 0.41596800  | 1.41266700  |
| C | 0.50169300  | 5.42985400  | -0.06326000 | C  | 6.62903800  | 0.40233000  | 0.91596500  |
| C | 1.61802900  | 4.78384800  | 0.45740700  | C  | 6.84780500  | -0.10153300 | -0.36267400 |
| C | 1.59326800  | 3.38702900  | 0.50451100  | C  | 5.79158400  | -0.58121800 | -1.13587400 |
| N | 2.54059000  | 2.49026100  | 0.96094000  | C  | 4.50426700  | -0.55493300 | -0.60858700 |
| H | 3.42847700  | 2.73116800  | 1.37455100  | H  | 3.66674400  | -0.93493700 | -1.18356500 |
| C | 2.05614000  | 1.20517900  | 0.80308800  | H  | 5.97557400  | -0.96912500 | -2.13173100 |
| C | 2.79624200  | -0.04942900 | 1.19941600  | Cl | 8.48242600  | -0.12870000 | -1.00276900 |
| H | 2.83955500  | -0.09752600 | 2.30231900  | H  | 7.45021800  | 0.77559000  | 1.51574400  |
| N | 2.05463400  | -1.18102300 | 0.63346300  | Cl | 5.10075500  | 1.09078200  | 3.03495800  |
| C | 0.61128900  | -1.12470000 | 0.85634700  | H  | 2.47747500  | 5.34579800  | 0.81395400  |
| H | 0.35928800  | -0.90520600 | 1.91473100  | H  | 0.49018500  | 6.51519900  | -0.11376400 |
| C | 0.04069500  | -2.51096800 | 0.58337100  | H  | -1.46867200 | 5.23996900  | -0.92751100 |
| O | 0.69629500  | -3.53194800 | 0.58700400  | H  | 0.02371900  | -0.29308000 | -1.05879700 |
| O | -1.29077000 | -2.47576700 | 0.39349400  | H  | -1.05222500 | 0.13803400  | 0.27113100  |
| C | -1.92103500 | -3.75416300 | 0.19375000  |    |             |             |             |



8a-02

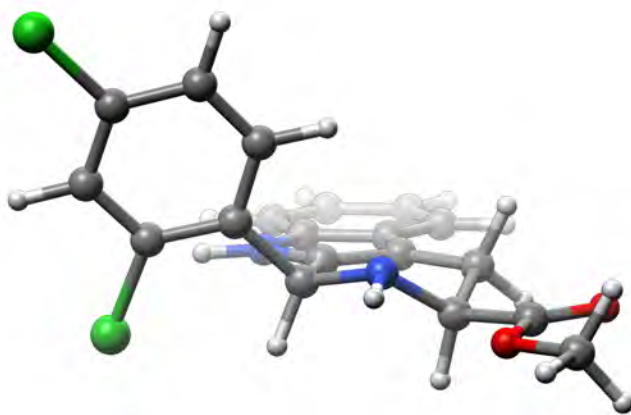

|   |             |             |             |    |             |             |             |
|---|-------------|-------------|-------------|----|-------------|-------------|-------------|
| C | 0.00000000  | 0.00000000  | 0.00000000  | H  | -0.77276600 | 4.92819900  | -0.45647100 |
| C | -0.61671300 | -1.33675500 | 0.28488000  | H  | 0.10906200  | 5.01609200  | 1.08727300  |
| C | -0.10249300 | -2.66988900 | 0.11262800  | H  | -1.65303000 | 5.36099200  | 1.04778800  |
| C | 1.09800100  | -3.20188500 | -0.38773400 | H  | -2.67955400 | 1.71897100  | 1.00821000  |
| H | 1.87945300  | -2.54392500 | -0.75947900 | C  | -4.20123200 | -0.50896000 | 0.69892700  |
| C | 1.27130400  | -4.58053300 | -0.40100800 | C  | -5.21398900 | -1.10512200 | 1.46046000  |
| C | 0.26547800  | -5.44513000 | 0.07649600  | C  | -6.51140400 | -1.27938900 | 0.97664000  |
| C | -0.93369000 | -4.94954900 | 0.57750800  | C  | -6.80311900 | -0.85021200 | -0.31454800 |
| C | -1.10441900 | -3.56219100 | 0.59036700  | C  | -5.82398100 | -0.26126700 | -1.11357600 |
| N | -2.17038000 | -2.79568600 | 1.02224600  | C  | -4.54158000 | -0.10007700 | -0.59854700 |
| H | -3.01804900 | -3.14836200 | 1.43991100  | H  | -3.76549300 | 0.36816200  | -1.19425700 |
| C | -1.86751700 | -1.45946500 | 0.83344600  | H  | -6.06320500 | 0.06507100  | -2.11975800 |
| C | -2.77140600 | -0.31284200 | 1.20806900  | Cl | -8.43114500 | -1.05851500 | -0.93728100 |
| H | -2.81363400 | -0.24587400 | 2.30964600  | H  | -7.27204300 | -1.73911000 | 1.59595800  |
| N | -2.20390300 | 0.90983800  | 0.61675900  | Cl | -4.89236500 | -1.69358400 | 3.09936100  |
| C | -0.75510900 | 1.05738900  | 0.81819900  | H  | -1.70843600 | -5.61752900 | 0.94518100  |
| H | -0.47745300 | 0.92917200  | 1.88454600  | H  | 0.42910100  | -6.51907900 | 0.05310400  |
| C | -0.31434200 | 2.46956400  | 0.44527100  | H  | 2.19564000  | -5.00256400 | -0.78603200 |
| O | 0.70910500  | 2.74872300  | -0.13632600 | H  | -0.05541900 | 0.26004300  | -1.06511200 |
| O | -1.19286700 | 3.39452300  | 0.89707600  | H  | 1.06117100  | 0.02256400  | 0.27178600  |
| C | -0.84682500 | 4.76377600  | 0.62141300  |    |             |             |             |

8a-03

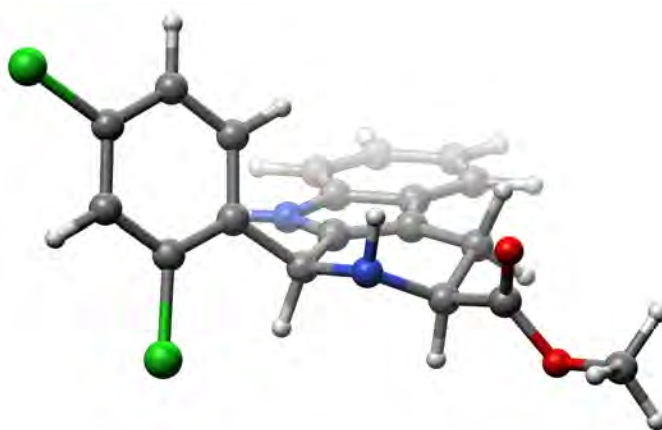

|   |             |             |             |    |             |             |             |
|---|-------------|-------------|-------------|----|-------------|-------------|-------------|
| C | 0.00000000  | 0.00000000  | 0.00000000  | H  | 0.18882300  | -5.04209600 | -0.02966600 |
| C | 0.49984200  | 1.35792900  | 0.39659400  | H  | -1.04357600 | -4.21032700 | -1.00813300 |
| C | -0.15820600 | 2.63923500  | 0.38662200  | H  | -1.45935400 | -4.79500200 | 0.63840400  |
| C | -1.42783600 | 3.08817100  | -0.01423800 | H  | 2.61182500  | -0.84559800 | -0.41305100 |
| H | -2.15459000 | 2.39148700  | -0.42443200 | C  | 4.17062700  | 0.78891200  | 0.71587300  |
| C | -1.74073900 | 4.43566500  | 0.11866300  | C  | 5.31763400  | 0.38011800  | 1.41303400  |
| C | -0.80701800 | 5.35069200  | 0.64523400  | C  | 6.60359600  | 0.65942500  | 0.94845100  |
| C | 0.45689500  | 4.93697600  | 1.05335200  | C  | 6.74963400  | 1.35515600  | -0.24882000 |
| C | 0.76644300  | 3.58020500  | 0.92280100  | C  | 5.63867200  | 1.77170300  | -0.97929800 |
| N | 1.91934200  | 2.88824800  | 1.24654700  | C  | 4.36861500  | 1.48355400  | -0.48620000 |
| H | 2.77540700  | 3.30090900  | 1.58417500  | H  | 3.49560900  | 1.80990800  | -1.04482200 |
| C | 1.75699100  | 1.55428400  | 0.90908300  | H  | 5.76526600  | 2.31088300  | -1.91150500 |
| C | 2.75765800  | 0.46001200  | 1.18177500  | Cl | 8.36356100  | 1.71215600  | -0.83842000 |
| H | 2.79483500  | 0.29406300  | 2.26713400  | H  | 7.47106400  | 0.33593100  | 1.51086300  |
| N | 2.33818200  | -0.81325100 | 0.56792800  | Cl | 5.19381700  | -0.50987000 | 2.92525800  |
| C | 0.90191400  | -1.08410300 | 0.66277100  | H  | 1.17460100  | 5.64373100  | 1.46209300  |
| H | 0.63712800  | -1.15895400 | 1.72277800  | H  | -1.07899200 | 6.39872000  | 0.73606400  |
| C | 0.64343100  | -2.42348100 | -0.01071100 | H  | -2.71964400 | 4.79322500  | -0.18880900 |
| O | 1.19467800  | -2.79055100 | -1.02652100 | H  | 0.02155700  | -0.13218200 | -1.09199400 |
| O | -0.31678300 | -3.12367600 | 0.62316400  | H  | -1.04162400 | -0.14940300 | 0.31322200  |
| C | -0.67562800 | -4.37445200 | 0.00809100  |    |             |             |             |

**8a-04**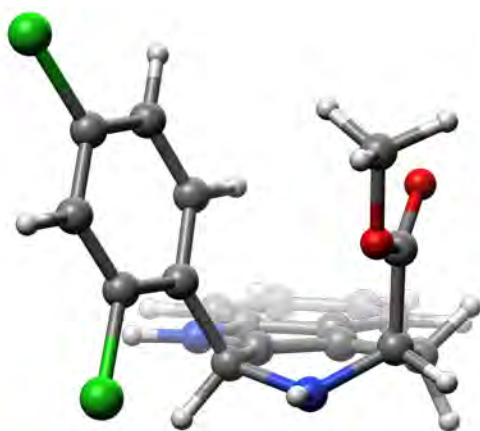

|   |             |             |             |    |             |             |             |
|---|-------------|-------------|-------------|----|-------------|-------------|-------------|
| C | 0.0000000   | 0.0000000   | 0.0000000   | H  | -4.52999100 | -0.58219500 | -2.34400700 |
| C | 0.25022300  | -1.46920500 | 0.15752800  | H  | -4.14662600 | 1.11046800  | -2.74594800 |
| C | 1.39231300  | -2.27059100 | -0.20008200 | H  | -5.46575500 | 0.74585600  | -1.58278500 |
| C | 2.62185000  | -2.00257600 | -0.82439500 | H  | -2.95994600 | -0.11566000 | 1.59289300  |
| H | 2.86706000  | -0.99408200 | -1.14732700 | C  | -3.16256900 | -2.54931900 | 0.52740500  |
| C | 3.51837700  | -3.04504600 | -1.02623600 | C  | -4.42935400 | -2.70107800 | 1.11220800  |
| C | 3.21185500  | -4.35770000 | -0.61468500 | C  | -5.50508900 | -3.27865100 | 0.44001700  |
| C | 2.00351600  | -4.65533100 | 0.00689700  | C  | -5.31352400 | -3.71836100 | -0.86781400 |
| C | 1.10478600  | -3.60400500 | 0.20877200  | C  | -4.07731000 | -3.58358700 | -1.49576000 |
| N | -0.14998200 | -3.59654100 | 0.78982500  | C  | -3.02185200 | -3.00601500 | -0.79141300 |
| H | -0.63080200 | -4.40269700 | 1.15794100  | H  | -2.05917400 | -2.89817300 | -1.28075100 |
| C | -0.65315800 | -2.30555900 | 0.75480800  | H  | -3.93911800 | -3.92804900 | -2.51482900 |
| C | -1.99091400 | -1.90614800 | 1.29467000  | Cl | -6.65699800 | -4.45141500 | -1.72842000 |
| H | -2.07062300 | -2.25239300 | 2.33354200  | H  | -6.46731900 | -3.38280400 | 0.92685800  |
| N | -2.01967100 | -0.43031500 | 1.37163300  | Cl | -4.72597600 | -2.14483200 | 2.76307900  |
| C | -1.48719600 | 0.32482900  | 0.22872500  | H  | 1.76922100  | -5.66839600 | 0.32397700  |
| H | -1.57577300 | 1.38091000  | 0.51500700  | H  | 3.93199700  | -5.15312500 | -0.78604300 |
| C | -2.31031700 | 0.19965000  | -1.06909700 | H  | 4.47158500  | -2.84870500 | -1.50940800 |
| O | -1.89045500 | -0.09139100 | -2.16777200 | H  | 0.29109400  | 0.34479200  | -0.99756600 |
| O | -3.60516800 | 0.50520300  | -0.82199000 | H  | 0.59437200  | 0.56823200  | 0.72797400  |
| C | -4.48816700 | 0.43806300  | -1.95469400 |    |             |             |             |

8a-05

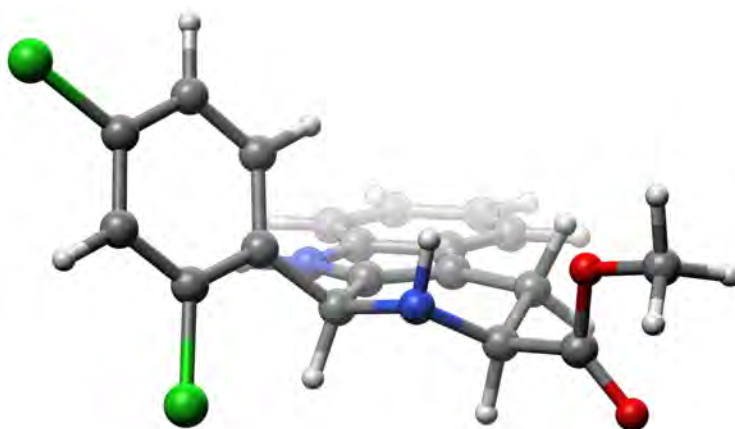

|   |             |             |             |    |             |             |             |
|---|-------------|-------------|-------------|----|-------------|-------------|-------------|
| C | 0.00000000  | 0.00000000  | 0.00000000  | H  | -0.39284800 | 4.16328500  | -1.57863200 |
| C | -0.31339200 | -1.44290800 | 0.27126900  | H  | -1.89982600 | 4.58178700  | -0.72877600 |
| C | 0.51594700  | -2.61633700 | 0.17264200  | H  | -1.97567100 | 3.86227100  | -2.37184200 |
| C | 1.83817800  | -2.85194700 | -0.24010100 | H  | -2.66301800 | 0.44750300  | -0.44926100 |
| H | 2.46436900  | -2.03051600 | -0.57896900 | C  | -4.03372000 | -1.41751100 | 0.56809800  |
| C | 2.33337400  | -4.15002800 | -0.21050200 | C  | -5.23164000 | -1.20001800 | 1.26603900  |
| C | 1.53197100  | -5.22467500 | 0.22486700  | C  | -6.46540900 | -1.61571000 | 0.76375500  |
| C | 0.22073900  | -5.02346500 | 0.64319500  | C  | -6.50777800 | -2.25534800 | -0.47250000 |
| C | -0.27271800 | -3.71588700 | 0.61599300  | C  | -5.34446600 | -2.48405400 | -1.20418500 |
| N | -1.51316700 | -3.21811100 | 0.97151100  | C  | -4.12750800 | -2.06349500 | -0.67322900 |
| H | -2.30421100 | -3.77072600 | 1.26467400  | H  | -3.21410800 | -2.24397100 | -1.23349700 |
| C | -1.53541900 | -1.85153500 | 0.74367100  | H  | -5.39012900 | -2.98217500 | -2.16625300 |
| C | -2.68234600 | -0.92988600 | 1.07462400  | Cl | -8.05583300 | -2.78098500 | -1.11022100 |
| H | -2.74755500 | -0.83579800 | 2.16678800  | H  | -7.37330900 | -1.43886500 | 1.32759000  |
| N | -2.43952400 | 0.42756200  | 0.54479600  | Cl | -5.23979400 | -0.38794900 | 2.82577700  |
| C | -1.05383600 | 0.88326400  | 0.72710700  | H  | -0.39472200 | -5.85306200 | 0.98173900  |
| H | -0.83863700 | 0.87111700  | 1.80025200  | H  | 1.94600300  | -6.22917200 | 0.23642900  |
| C | -0.92071900 | 2.33410900  | 0.28529000  | H  | 3.35439800  | -4.34340900 | -0.52782800 |
| O | -0.31691300 | 3.19199200  | 0.88845600  | H  | -0.01772500 | 0.22178300  | -1.07721200 |
| O | -1.52068700 | 2.53723300  | -0.91011500 | H  | 1.00466600  | 0.26268900  | 0.35646900  |
| C | -1.43660500 | 3.87740400  | -1.42425200 |    |             |             |             |

**8a-06**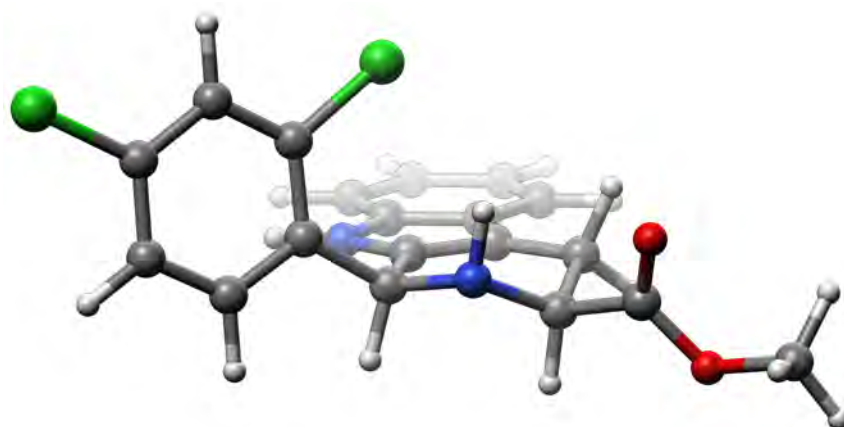

|   |            |            |            |    |            |            |            |
|---|------------|------------|------------|----|------------|------------|------------|
| C | 0.0000000  | 0.0000000  | 0.0000000  | H  | 0.6648180  | -4.9678780 | -0.2995970 |
| C | -0.6990520 | 1.2936030  | -0.2943070 | H  | 1.6633090  | -4.0080850 | 0.8178970  |
| C | -0.2497150 | 2.6557950  | -0.1695510 | H  | 2.2641570  | -4.3554700 | -0.8386120 |
| C | 0.9434140  | 3.2619540  | 0.2584680  | H  | -2.4603290 | -1.2410420 | 0.3798290  |
| H | 1.7813660  | 2.6546230  | 0.5914610  | C  | -4.2864380 | 0.2261240  | -0.7873900 |
| C | 1.0363160  | 4.6486620  | 0.2541930  | C  | -4.7964820 | 0.4515130  | 0.5024480  |
| C | -0.0433130 | 5.4488870  | -0.1702210 | C  | -6.1663020 | 0.5395850  | 0.7530510  |
| C | -1.2360840 | 4.8788090  | -0.6036960 | C  | -7.0581770 | 0.4007290  | -0.3071770 |
| C | -1.3245490 | 3.4842050  | -0.6021690 | C  | -6.6002970 | 0.1723720  | -1.6020340 |
| N | -2.3609700 | 2.6511480  | -0.9845930 | C  | -5.2271630 | 0.0882050  | -1.8183620 |
| H | -3.2910970 | 2.9523800  | -1.2324370 | H  | -4.8655230 | -0.0981650 | -2.8260150 |
| C | -1.9838860 | 1.3368060  | -0.7685270 | H  | -7.3012210 | 0.0597720  | -2.4215490 |
| C | -2.8037430 | 0.1237830  | -1.1354320 | Cl | -8.7810820 | 0.5156250  | 0.0032280  |
| H | -2.7682050 | 0.0276370  | -2.2322650 | H  | -6.5255380 | 0.7115130  | 1.7604980  |
| N | -2.2120500 | -1.1127870 | -0.5993960 | Cl | -3.7323870 | 0.6276640  | 1.8927140  |
| C | -0.7525770 | -1.1614550 | -0.7185090 | H  | -2.0672700 | 5.4972910  | -0.9329640 |
| H | -0.4966080 | -1.1305910 | -1.7836600 | H  | 0.0571210  | 6.5307720  | -0.1605390 |
| C | -0.2839820 | -2.4870220 | -0.1384250 | H  | 1.9542340  | 5.1269920  | 0.5849630  |
| O | -0.7996670 | -3.0406890 | 0.8083960  | H  | 0.0229340  | -0.1987880 | 1.0820500  |
| O | 0.8200980  | -2.9383820 | -0.7676020 | H  | 1.0442620  | 0.0185770  | -0.3379510 |
| C | 1.3839940  | -4.1477540 | -0.2297090 |    |            |            |            |

8a-07

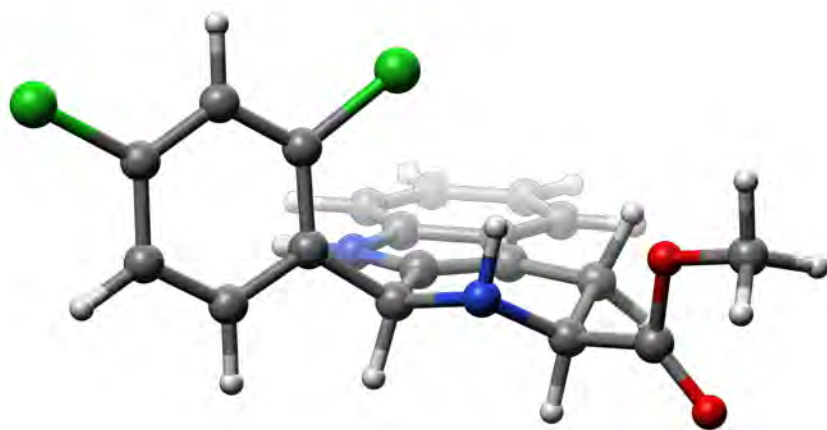

|   |             |             |             |    |             |             |             |
|---|-------------|-------------|-------------|----|-------------|-------------|-------------|
| C | 0.00000000  | 0.00000000  | 0.00000000  | H  | -0.35554200 | 4.27021500  | 1.27961900  |
| C | 0.55856000  | -1.38340400 | -0.16402500 | H  | 1.09396800  | 4.87632900  | 0.44327200  |
| C | -0.04430600 | -2.67341700 | 0.04817700  | H  | 1.22488900  | 4.28289600  | 2.13260500  |
| C | -1.30815300 | -3.10810200 | 0.48212200  | H  | 2.53935300  | 0.91148900  | 0.43619900  |
| H | -2.08042300 | -2.38763600 | 0.73953900  | C  | 4.25921000  | -0.77315700 | -0.62332600 |
| C | -1.55627900 | -4.47187600 | 0.58122000  | C  | 4.72034100  | -0.96971300 | 0.68935100  |
| C | -0.56395800 | -5.41779400 | 0.25437200  | C  | 6.06591800  | -1.20004800 | 0.97726400  |
| C | 0.69519600  | -5.01942200 | -0.18279200 | C  | 6.98423400  | -1.23751400 | -0.06884200 |
| C | 0.94006600  | -3.64735500 | -0.28489500 | C  | 6.57592900  | -1.04453400 | -1.38589400 |
| N | 2.07317000  | -2.96721200 | -0.69449900 | C  | 5.22577000  | -0.81536100 | -1.63891900 |
| H | 2.96792900  | -3.38900900 | -0.89136800 | H  | 4.90456600  | -0.65639600 | -2.66477500 |
| C | 1.84183700  | -1.60635600 | -0.59173000 | H  | 7.29748700  | -1.06994500 | -2.19480300 |
| C | 2.80462700  | -0.52237500 | -1.01209300 | Cl | 8.67634900  | -1.53109000 | 0.28824700  |
| H | 2.79827200  | -0.48253600 | -2.11223200 | H  | 6.38681000  | -1.34553100 | 2.00170300  |
| N | 2.34649500  | 0.80414000  | -0.55815000 | Cl | 3.62156700  | -0.92646100 | 2.06473400  |
| C | 0.90394200  | 1.00169400  | -0.77507800 | H  | 1.45887400  | -5.75016700 | -0.43692600 |
| H | 0.71145800  | 0.88533300  | -1.84669200 | H  | -0.78603100 | -6.47771000 | 0.34320700  |
| C | 0.52047600  | 2.43504900  | -0.43507400 | H  | -2.52996700 | -4.81798600 | 0.91721100  |
| O | -0.19775700 | 3.14007700  | -1.10768200 | H  | -0.04128900 | 0.28992400  | 1.06017700  |
| O | 1.04456200  | 2.81278000  | 0.75272800  | H  | -1.02672900 | 0.06744800  | -0.38346600 |
| C | 0.72566600  | 4.15020600  | 1.17249000  |    |             |             |             |

8a-08

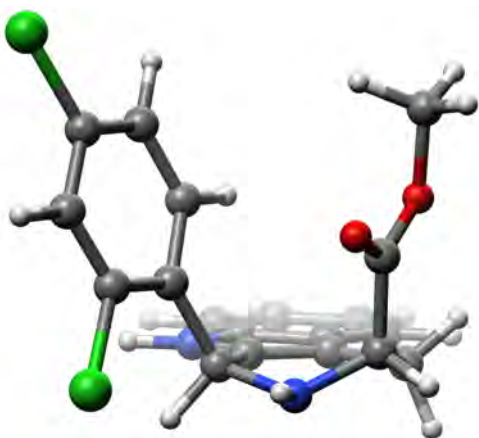

|   |             |             |             |    |             |             |             |
|---|-------------|-------------|-------------|----|-------------|-------------|-------------|
| C | 0.00000000  | 0.00000000  | 0.00000000  | H  | -3.01894600 | 1.55942800  | -3.33861400 |
| C | 0.18621700  | -1.48547800 | -0.05486000 | H  | -3.29288500 | -0.19766400 | -3.39227200 |
| C | 1.29975100  | -2.27937700 | -0.50674600 | H  | -1.84322700 | 0.50253300  | -4.19186800 |
| C | 2.54799400  | -1.98341800 | -1.07938800 | H  | -3.00342500 | -0.20192800 | 1.48629500  |
| H | 2.84044200  | -0.95220200 | -1.26044400 | C  | -3.26528400 | -2.46073600 | 0.11868400  |
| C | 3.40331400  | -3.02710700 | -1.41210200 | C  | -4.55742600 | -2.60876200 | 0.64430500  |
| C | 3.03743200  | -4.36854400 | -1.18198500 | C  | -5.63753100 | -3.03836800 | -0.12436400 |
| C | 1.80971400  | -4.69440500 | -0.61471200 | C  | -5.42277400 | -3.33251700 | -1.46844200 |
| C | 0.95245800  | -3.64205400 | -0.28091900 | C  | -4.15840600 | -3.20207400 | -2.03778900 |
| N | -0.30810300 | -3.65821500 | 0.28718200  | C  | -3.10115700 | -2.77115200 | -1.23884700 |
| H | -0.82832300 | -4.48476300 | 0.53816100  | H  | -2.11416500 | -2.66821100 | -1.67923300 |
| C | -0.75864300 | -2.35451700 | 0.41992400  | H  | -4.00260100 | -3.43964500 | -3.08461100 |
| C | -2.08997400 | -1.97484600 | 0.98932400  | Cl | -6.77066600 | -3.88202000 | -2.45007500 |
| H | -2.20699800 | -2.45659800 | 1.96917100  | H  | -6.62164500 | -3.14007400 | 0.31689100  |
| N | -2.06214300 | -0.52133600 | 1.27108700  | Cl | -4.88027600 | -2.24192300 | 2.34141900  |
| C | -1.47847200 | 0.35581300  | 0.24810800  | H  | 1.52999400  | -5.72967700 | -0.43681500 |
| H | -1.51378200 | 1.36482800  | 0.68080800  | H  | 3.72650900  | -5.16404900 | -1.45209200 |
| C | -2.37647200 | 0.47807000  | -1.00024400 | H  | 4.37082600  | -2.80900400 | -1.85594400 |
| O | -3.57369000 | 0.65626200  | -0.91605700 | H  | 0.34567000  | 0.48308100  | -0.91899800 |
| O | -1.71413000 | 0.41758100  | -2.17246600 | H  | 0.59133500  | 0.42274200  | 0.82380100  |
| C | -2.52886900 | 0.58247400  | -3.34799400 |    |             |             |             |

**8a-09**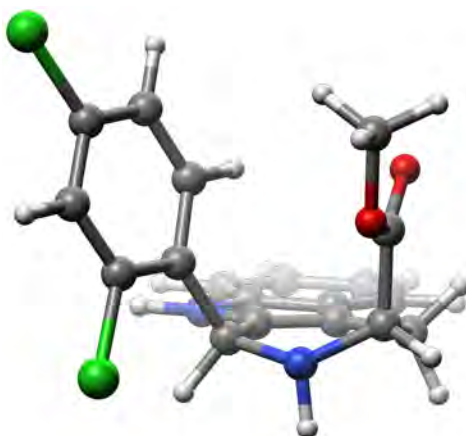

|   |             |             |             |    |             |             |             |
|---|-------------|-------------|-------------|----|-------------|-------------|-------------|
| C | 0.00000000  | 0.00000000  | 0.00000000  | H  | -4.47827100 | -0.31249700 | -2.49238600 |
| C | 0.23132700  | -1.47977800 | 0.05986000  | H  | -3.94098100 | 1.34791900  | -2.84895300 |
| C | 1.37240500  | -2.26467500 | -0.33561600 | H  | -5.34486200 | 1.07718800  | -1.76084100 |
| C | 2.62018900  | -1.96201300 | -0.90550000 | H  | -1.78784600 | -0.21930900 | 2.16777000  |
| H | 2.88432800  | -0.93366300 | -1.13845800 | C  | -3.22290700 | -2.54640300 | 0.35304500  |
| C | 3.50990100  | -2.99593900 | -1.17138700 | C  | -4.47490500 | -2.73342700 | 0.95972300  |
| C | 3.17828300  | -4.33390800 | -0.87782300 | C  | -5.56603800 | -3.25964500 | 0.27033600  |
| C | 1.95151700  | -4.66582500 | -0.31207400 | C  | -5.40586900 | -3.60669400 | -1.06949900 |
| C | 1.05981600  | -3.62296300 | -0.04504400 | C  | -4.18385500 | -3.43637100 | -1.71458900 |
| N | -0.20691500 | -3.64568600 | 0.50938200  | C  | -3.11011900 | -2.91333800 | -0.99429300 |
| H | -0.71901100 | -4.47569000 | 0.76566400  | H  | -2.15868800 | -2.76991000 | -1.49639600 |
| C | -0.69858800 | -2.34974000 | 0.56494400  | H  | -4.07025100 | -3.70916500 | -2.75803400 |
| C | -2.03575700 | -1.96276900 | 1.12834400  | Cl | -6.77347900 | -4.27204900 | -1.94863600 |
| H | -2.11479700 | -2.35118400 | 2.15123500  | H  | -6.51779500 | -3.39587300 | 0.76953900  |
| N | -2.15677700 | -0.49298000 | 1.26142100  | Cl | -4.72770800 | -2.31768100 | 2.65261400  |
| C | -1.49551700 | 0.32176300  | 0.22785900  | H  | 1.69804800  | -5.69846000 | -0.08592800 |
| H | -1.59015700 | 1.35688400  | 0.57892800  | H  | 3.89332700  | -5.12198900 | -1.09765500 |
| C | -2.28447500 | 0.28416700  | -1.09216100 | H  | 4.47703900  | -2.77296800 | -1.61359700 |
| O | -1.82297000 | -0.01299200 | -2.17421700 | H  | 0.31621400  | 0.40766800  | -0.96618100 |
| O | -3.55576200 | 0.68004500  | -0.90623700 | H  | 0.59231200  | 0.51582400  | 0.77073300  |
| C | -4.37614900 | 0.69699300  | -2.08588900 |    |             |             |             |



## 8a-10

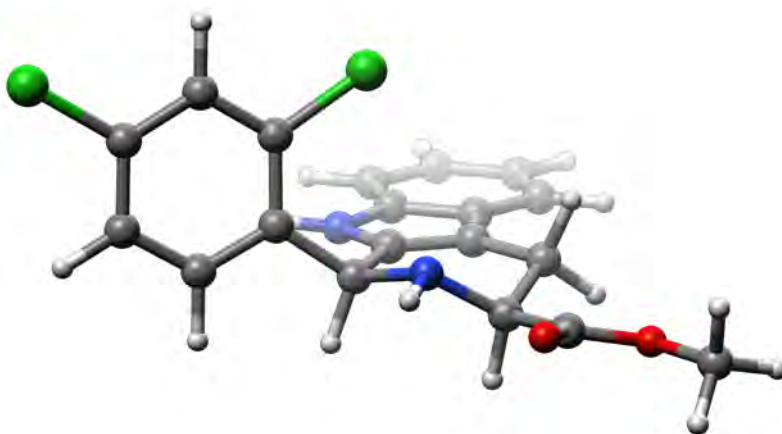

|   |             |             |             |    |             |             |             |
|---|-------------|-------------|-------------|----|-------------|-------------|-------------|
| C | 0.00000000  | 0.00000000  | 0.00000000  | H  | 1.27088300  | -4.61994400 | -0.69996400 |
| C | -0.66151000 | 1.30718900  | -0.32748300 | H  | 0.98728800  | -4.34156100 | 1.03525000  |
| C | -0.19262400 | 2.66297100  | -0.20946000 | H  | 2.54406600  | -3.83712100 | 0.29608500  |
| C | 0.99874200  | 3.25492200  | 0.24280400  | H  | -2.64967500 | -1.84804300 | -0.82750300 |
| H | 1.81627500  | 2.63805500  | 0.60747700  | C  | -4.25637400 | 0.31428800  | -0.81010800 |
| C | 1.11579400  | 4.63963700  | 0.22213300  | C  | -4.73605100 | 0.53986500  | 0.49330000  |
| C | 0.06259300  | 5.45215300  | -0.24346800 | C  | -6.10265400 | 0.63671300  | 0.76162800  |
| C | -1.12742200 | 4.89648500  | -0.70243500 | C  | -7.01495100 | 0.50834900  | -0.28303100 |
| C | -1.24054700 | 3.50389900  | -0.68301100 | C  | -6.58423600 | 0.28664600  | -1.58750200 |
| N | -2.28053600 | 2.68408800  | -1.08408200 | C  | -5.21464100 | 0.19304400  | -1.82603800 |
| H | -3.20101100 | 2.99691500  | -1.35286100 | H  | -4.87094300 | 0.01304400  | -2.84178700 |
| C | -1.92987200 | 1.36837200  | -0.84144200 | H  | -7.30024300 | 0.18559300  | -2.39540700 |
| C | -2.78301500 | 0.17786600  | -1.18823100 | Cl | -8.73193700 | 0.63176400  | 0.06062100  |
| H | -2.76959000 | 0.07738600  | -2.29418300 | H  | -6.44443500 | 0.81021700  | 1.77491600  |
| N | -2.18570100 | -0.99024000 | -0.53861800 | Cl | -3.65730300 | 0.72935800  | 1.86018300  |
| C | -0.74677900 | -1.11128800 | -0.76336500 | H  | -1.93823000 | 5.52423400  | -1.06342800 |
| H | -0.48289900 | -1.00271300 | -1.83761400 | H  | 0.18152900  | 6.53220500  | -0.24558200 |
| C | -0.33262300 | -2.53048700 | -0.39409600 | H  | 2.03233200  | 5.10696100  | 0.57199200  |
| O | -1.09108700 | -3.47728300 | -0.37465100 | H  | -0.04002800 | -0.20786500 | 1.07786400  |
| O | 0.98781500  | -2.62353500 | -0.15241500 | H  | 1.05644400  | -0.00262600 | -0.28953600 |
| C | 1.47112200  | -3.94738700 | 0.13812100  |    |             |             |             |

## 8a-11

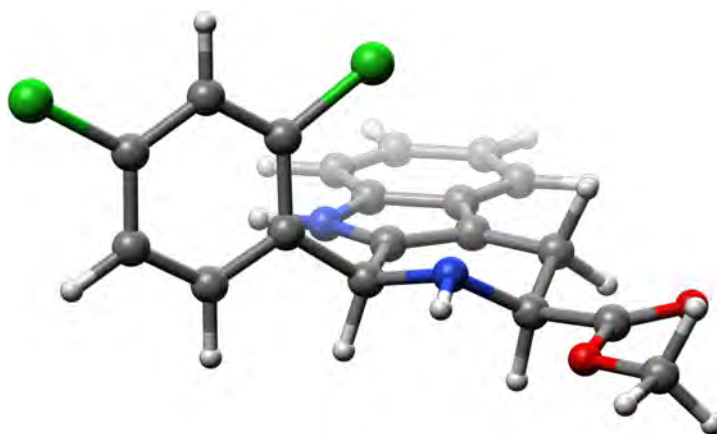

|   |             |             |             |    |             |             |             |
|---|-------------|-------------|-------------|----|-------------|-------------|-------------|
| C | 0.00000000  | 0.00000000  | 0.00000000  | H  | 1.45417700  | 4.72076100  | 0.83780500  |
| C | 0.43926200  | -1.39039000 | -0.35090600 | H  | 0.60639100  | 5.05032300  | -0.69247300 |
| C | -0.24300200 | -2.65418300 | -0.25512600 | H  | 2.39889000  | 5.14277000  | -0.62961900 |
| C | -1.51772800 | -3.05095900 | 0.18291500  | H  | 2.92259500  | 1.39570800  | -0.84391300 |
| H | -2.22737000 | -2.31443700 | 0.55120500  | C  | 4.15122900  | -0.99035500 | -0.82348300 |
| C | -1.85659200 | -4.39817400 | 0.14341400  | C  | 4.59393600  | -1.31556300 | 0.47209700  |
| C | -0.94474300 | -5.36438100 | -0.32693800 | C  | 5.92731200  | -1.64096000 | 0.72756200  |
| C | 0.32277800  | -5.00286000 | -0.77219000 | C  | 6.84320300  | -1.64471200 | -0.32190800 |
| C | 0.65916500  | -3.64710900 | -0.73386400 | C  | 6.44845100  | -1.33050500 | -1.61875700 |
| N | 1.82109200  | -3.00110100 | -1.11800200 | C  | 5.11158500  | -1.00882400 | -1.84465700 |
| H | 2.68264800  | -3.45550400 | -1.37970600 | H  | 4.79693200  | -0.75700100 | -2.85459400 |
| C | 1.68471700  | -1.64893100 | -0.85718300 | H  | 7.16712700  | -1.33441400 | -2.43062700 |
| C | 2.71825700  | -0.60862800 | -1.18689100 | Cl | 8.51799800  | -2.05528500 | 0.00570100  |
| H | 2.71650200  | -0.48364700 | -2.28976500 | H  | 6.24090500  | -1.88816400 | 1.73467500  |
| N | 2.32990500  | 0.63858700  | -0.51382500 | Cl | 3.50518700  | -1.34894100 | 1.84330200  |
| C | 0.91984200  | 0.99865800  | -0.72107400 | H  | 1.02413500  | -5.74911600 | -1.13692900 |
| H | 0.65407500  | 0.99076900  | -1.79933900 | H  | -1.23639500 | -6.41097300 | -0.34389500 |
| C | 0.66902100  | 2.42684400  | -0.24706300 | H  | -2.83915200 | -4.71539200 | 0.48213800  |
| O | -0.31216700 | 2.80114400  | 0.35347800  | H  | 0.05321000  | 0.17779000  | 1.08170300  |
| O | 1.66909800  | 3.25374600  | -0.63236800 | H  | -1.03759500 | 0.18837600  | -0.29767900 |
| C | 1.51385600  | 4.63183700  | -0.24977900 |    |             |             |             |

## 8a-12

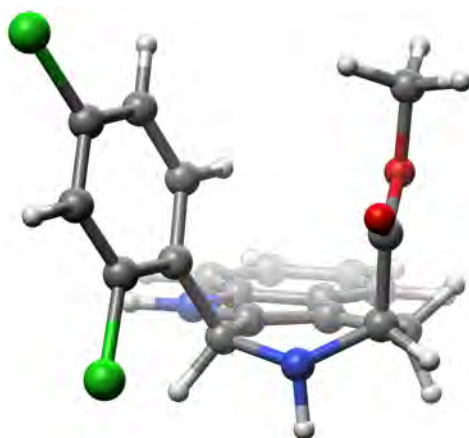

|   |             |             |             |    |             |             |             |
|---|-------------|-------------|-------------|----|-------------|-------------|-------------|
| C | 0.00000000  | 0.00000000  | 0.00000000  | H  | -2.71955500 | 1.21046400  | -3.57437100 |
| C | 0.17935400  | -1.48823100 | 0.00347400  | H  | -3.33918600 | -0.44243600 | -3.35442300 |
| C | 1.29936600  | -2.29778100 | -0.40217900 | H  | -1.76562500 | -0.18453600 | -4.18439900 |
| C | 2.56521400  | -2.01963900 | -0.94440800 | H  | -1.83572400 | -0.23002400 | 2.12776000  |
| H | 2.86851800  | -0.99368200 | -1.13718900 | C  | -3.31121800 | -2.43428800 | 0.19682200  |
| C | 3.42346700  | -3.07407800 | -1.23255400 | C  | -4.59578600 | -2.53489200 | 0.75381700  |
| C | 3.04283400  | -4.40886500 | -0.98799900 | C  | -5.69179900 | -2.98468900 | 0.01992500  |
| C | 1.79742400  | -4.71696900 | -0.45009000 | C  | -5.50238000 | -3.34748200 | -1.31166600 |
| C | 0.93728800  | -3.65371900 | -0.16081400 | C  | -4.24572600 | -3.26916600 | -1.90527600 |
| N | -0.33790700 | -3.65125700 | 0.37415300  | C  | -3.16938700 | -2.81647200 | -1.14294900 |
| H | -0.87748800 | -4.47091700 | 0.60642900  | H  | -2.18822200 | -2.74794000 | -1.60184100 |
| C | -0.78642700 | -2.34207300 | 0.46784100  | H  | -4.10970600 | -3.56051800 | -2.94112600 |
| C | -2.12070800 | -1.92634900 | 1.01878000  | Cl | -6.87489100 | -3.92075200 | -2.24526400 |
| H | -2.23687200 | -2.34884400 | 2.02495100  | H  | -6.67047700 | -3.05090800 | 0.47957800  |
| N | -2.18995100 | -0.46038400 | 1.20403700  | Cl | -4.88298000 | -2.11058000 | 2.43747200  |
| C | -1.48874400 | 0.37245600  | 0.21277100  | H  | 1.50637000  | -5.74715500 | -0.26113700 |
| H | -1.53959400 | 1.39043500  | 0.61643900  | H  | 3.73429900  | -5.21323500 | -1.22356300 |
| C | -2.34225900 | 0.46948600  | -1.06720000 | H  | 4.40449000  | -2.86981700 | -1.65269100 |
| O | -3.46603100 | 0.91406700  | -1.08543400 | H  | 0.36986800  | 0.44325800  | -0.93074100 |
| O | -1.68994500 | 0.05061400  | -2.17562800 | H  | 0.58636200  | 0.45639100  | 0.81234400  |
| C | -2.43474400 | 0.16972800  | -3.39964700 |    |             |             |             |

## 8a-13

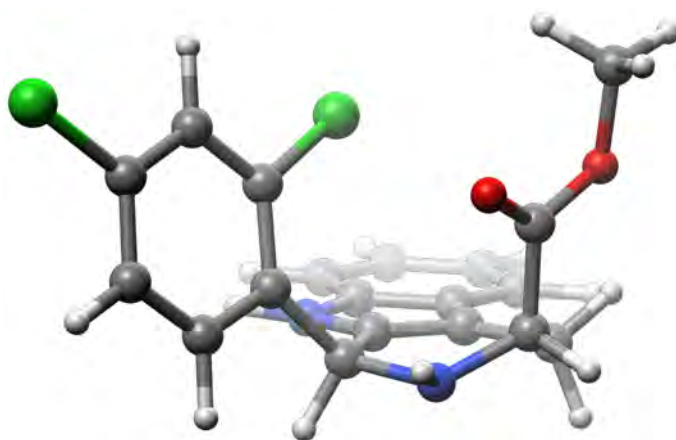

|   |             |             |             |    |             |             |             |
|---|-------------|-------------|-------------|----|-------------|-------------|-------------|
| C | 0.00000000  | 0.00000000  | 0.00000000  | H  | -2.54420500 | 2.89601700  | -2.93735600 |
| C | -0.00830200 | -1.44578300 | -0.38523900 | H  | -2.46751600 | 1.30410800  | -3.73272500 |
| C | 1.01183000  | -2.27033100 | -0.97840000 | H  | -1.05864500 | 2.41440400  | -3.82527600 |
| C | 2.32215500  | -2.04022600 | -1.42947100 | H  | -3.20442400 | -0.03237000 | 1.00770300  |
| H | 2.76768200  | -1.05195400 | -1.34797600 | C  | -3.68219800 | -2.17146400 | -0.26036200 |
| C | 3.03938100  | -3.09253900 | -1.98652700 | C  | -3.92468100 | -2.17806800 | -1.64522800 |
| C | 2.47397700  | -4.37831400 | -2.09999500 | C  | -5.18663700 | -2.46222800 | -2.17250800 |
| C | 1.18186700  | -4.63956700 | -1.65501400 | C  | -6.24226800 | -2.74256900 | -1.31138700 |
| C | 0.46476200  | -3.57977800 | -1.09366900 | C  | -6.05215300 | -2.75486900 | 0.06738800  |
| N | -0.81135700 | -3.54543100 | -0.56015100 | C  | -4.78140800 | -2.47763100 | 0.56098300  |
| H | -1.49505700 | -4.28142500 | -0.65301100 | H  | -4.62684600 | -2.49662300 | 1.63751400  |
| C | -1.09581900 | -2.24651600 | -0.17116700 | H  | -6.87431300 | -2.98347000 | 0.73642400  |
| C | -2.37382100 | -1.83402500 | 0.48560900  | Cl | -7.82572200 | -3.09662700 | -1.98068400 |
| H | -2.45164800 | -2.41614600 | 1.41760400  | H  | -5.33624900 | -2.46035500 | -3.24538100 |
| N | -2.26820000 | -0.42057600 | 0.92782200  | Cl | -2.66661100 | -1.86439600 | -2.83528200 |
| C | -1.44069000 | 0.51862300  | 0.16812600  | H  | 0.74802200  | -5.63259700 | -1.74092000 |
| H | -1.38844700 | 1.42767200  | 0.78683500  | H  | 3.05727200  | -5.18144800 | -2.54209900 |
| C | -2.13405100 | 1.01161800  | -1.11599700 | H  | 4.05251800  | -2.92432900 | -2.34159800 |
| O | -3.34121400 | 1.04378300  | -1.23920900 | H  | 0.51942900  | 0.61116800  | -0.74358900 |
| O | -1.27791900 | 1.50325700  | -2.03025800 | H  | 0.52710700  | 0.14192800  | 0.95365400  |
| C | -1.88651300 | 2.06565600  | -3.20745000 |    |             |             |             |

## 8a-14

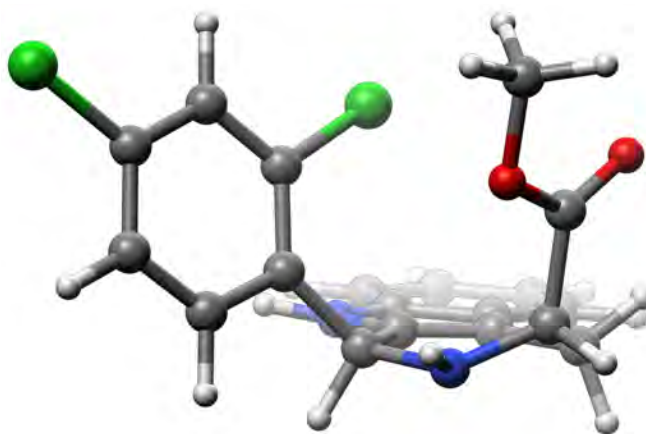

|   |             |             |             |    |             |             |             |
|---|-------------|-------------|-------------|----|-------------|-------------|-------------|
| C | 0.00000000  | 0.00000000  | 0.00000000  | H  | -3.82401400 | 0.72568600  | -3.21205000 |
| C | 0.04126400  | -1.47178700 | -0.26932500 | H  | -3.77656300 | 2.38259800  | -2.56051000 |
| C | 1.08832000  | -2.29972500 | -0.80869600 | H  | -5.14095100 | 1.29490400  | -2.13312800 |
| C | 2.38623500  | -2.05309700 | -1.28585800 | H  | -3.19313000 | -0.08015000 | 1.07245200  |
| H | 2.79087200  | -1.04424700 | -1.28538200 | C  | -3.60048200 | -2.35797200 | -0.01413000 |
| C | 3.14263100  | -3.11610500 | -1.76493400 | C  | -3.87981400 | -2.46363500 | -1.38824400 |
| C | 2.62828800  | -4.42807500 | -1.77562100 | C  | -5.12970700 | -2.87591200 | -1.85807800 |
| C | 1.34884100  | -4.70501600 | -1.30445300 | C  | -6.13672400 | -3.18338100 | -0.94852500 |
| C | 0.59247900  | -3.63404600 | -0.82104500 | C  | -5.90917000 | -3.09590900 | 0.42196100  |
| N | -0.68223800 | -3.60833200 | -0.28328900 | C  | -4.65019600 | -2.69457300 | 0.85822800  |
| H | -1.33515500 | -4.37683600 | -0.30759900 | H  | -4.46493900 | -2.63819200 | 1.92853000  |
| C | -1.01303400 | -2.29554000 | 0.01285800  | H  | -6.69298700 | -3.34453700 | 1.12888500  |
| C | -2.29592800 | -1.88623600 | 0.66254400  | Cl | -7.70554400 | -3.69572700 | -1.54533900 |
| H | -2.32488300 | -2.38468700 | 1.64503700  | H  | -5.30707700 | -2.95501300 | -2.92402700 |
| N | -2.24976600 | -0.43837100 | 0.96610300  | Cl | -2.68446200 | -2.10758400 | -2.62698700 |
| C | -1.45694500 | 0.47630300  | 0.14178700  | H  | 0.95450300  | -5.71803000 | -1.31134800 |
| H | -1.44224300 | 1.42471900  | 0.70027600  | H  | 3.24168000  | -5.23935600 | -2.15812500 |
| C | -2.05852400 | 0.88580000  | -1.21746700 | H  | 4.14660600  | -2.93584000 | -2.13945600 |
| O | -1.42809900 | 1.28426700  | -2.17124900 | H  | 0.47190700  | 0.56757500  | -0.80782800 |
| O | -3.41095500 | 0.86602000  | -1.17245300 | H  | 0.53908000  | 0.24103100  | 0.92619200  |
| C | -4.07425700 | 1.35148800  | -2.35242400 |    |             |             |             |

8a Shielding tensors B3LYP/6-311+G(2d,p)//B3LYP/6-31G(d) SCRF = (PCM, CHCl<sub>3</sub>)

|            | <b>8a-01</b> | <b>8a-02</b> | <b>8a-03</b> | <b>8a-04</b> | <b>8a-05</b> | <b>8a-06</b> | <b>8a-07</b> |
|------------|--------------|--------------|--------------|--------------|--------------|--------------|--------------|
| <b>1</b>   | 123.2424     | 123.0253     | 124.5188     | 125.7839     | 123.9887     | 118.3157     | 117.2873     |
| <b>3</b>   | 120.6582     | 120.237      | 121.0327     | 125.0976     | 117.8691     | 120.3565     | 116.9153     |
| <b>4</b>   | 153.1466     | 154.2828     | 151.9047     | 157.7095     | 152.3807     | 151.974      | 152.6891     |
| <b>4a</b>  | 69.5784      | 68.8268      | 65.4008      | 66.6129      | 64.7392      | 67.7289      | 67.4782      |
| <b>4b</b>  | 49.405       | 49.2185      | 48.7247      | 49.3867      | 49.1548      | 48.7507      | 48.6831      |
| <b>5</b>   | 59.8227      | 60.0005      | 59.7493      | 59.2373      | 60.5246      | 59.6165      | 60.1879      |
| <b>6</b>   | 58.5256      | 58.5199      | 58.0586      | 58.7455      | 58.4956      | 58.5133      | 58.3951      |
| <b>7</b>   | 56.2813      | 55.9968      | 55.7327      | 56.1439      | 55.7451      | 56.4153      | 55.8429      |
| <b>8</b>   | 67.8026      | 68.3478      | 67.736       | 68.6508      | 68.1495      | 67.66        | 68.5173      |
| <b>8a</b>  | 42.05        | 41.278       | 40.7513      | 40.38        | 40.9227      | 41.3914      | 41.3588      |
| <b>9a</b>  | 41.3211      | 42.2783      | 43.2326      | 45.7185      | 43.1065      | 42.3987      | 42.3536      |
| <b>1'</b>  | 34.8139      | 34.4731      | 36.8291      | 35.783       | 36.8442      | 38.0048      | 38.8832      |
| <b>2'</b>  | 35.4298      | 35.141       | 31.9276      | 33.2266      | 31.6184      | 33.2434      | 33.5821      |
| <b>3'</b>  | 47.5548      | 47.5242      | 46.523       | 47.0119      | 46.4213      | 45.073       | 45.3006      |
| <b>4'</b>  | 34.4679      | 34.2563      | 33.6288      | 33.7608      | 33.4503      | 32.8882      | 32.7891      |
| <b>5'</b>  | 49.007       | 48.9461      | 49.2945      | 49.9355      | 49.3487      | 49.2919      | 49.261       |
| <b>6'</b>  | 44.8868      | 44.9824      | 46.1672      | 44.7402      | 46.3908      | 41.8092      | 42.1607      |
| <b>1''</b> | -1.2859      | 0.6689       | -2.6908      | -3.3525      | 0.1707       | -2.761       | 0.0261       |
| <b>2''</b> | 127.7413     | 127.823      | 127.844      | 128.7967     | 128.3385     | 128.0147     | 128.167      |
|            | <b>8a-08</b> | <b>8a-09</b> | <b>8a-10</b> | <b>8a-11</b> | <b>8a-12</b> | <b>8a-13</b> | <b>8a-14</b> |
| <b>1</b>   | 125.8347     | 126.2946     | 116.1691     | 115.7368     | 126.4183     | 121.9585     | 121.2309     |
| <b>3</b>   | 124.7949     | 124.4588     | 119.6681     | 119.6213     | 123.5796     | 122.9416     | 122.9609     |
| <b>4</b>   | 157.4084     | 156.1761     | 153.5556     | 154.8891     | 155.7036     | 157.5584     | 157.6768     |
| <b>4a</b>  | 65.6188      | 65.078       | 67.0027      | 67.2964      | 64.6966      | 67.5412      | 67.4042      |
| <b>4b</b>  | 49.6801      | 49.3073      | 49.1604      | 48.6084      | 49.0644      | 49.0371      | 48.7703      |
| <b>5</b>   | 59.9864      | 59.7294      | 59.8349      | 59.468       | 60.0928      | 60.3263      | 60.0828      |
| <b>6</b>   | 58.8562      | 58.9164      | 58.4755      | 58.1453      | 58.9223      | 58.6435      | 58.7059      |
| <b>7</b>   | 56.0503      | 56.0276      | 56.5384      | 56.2827      | 56.1133      | 55.9621      | 56.1509      |
| <b>8</b>   | 67.7665      | 68.3405      | 67.8214      | 68.0891      | 68.0088      | 68.4069      | 68.1103      |
| <b>8a</b>  | 40.1874      | 40.3228      | 41.077       | 41.0876      | 40.4593      | 39.9047      | 39.806       |
| <b>9a</b>  | 43.7915      | 43.8511      | 42.2329      | 43.175       | 43.6012      | 45.6172      | 45.4898      |
| <b>1'</b>  | 33.9853      | 36.3873      | 37.6313      | 37.2255      | 35.7879      | 34.6811      | 34.6238      |
| <b>2'</b>  | 33.2687      | 31.8534      | 31.744       | 31.07        | 31.5746      | 33.1009      | 33.0535      |
| <b>3'</b>  | 46.915       | 46.9431      | 44.5002      | 44.569       | 46.6023      | 45.1292      | 45.4992      |
| <b>4'</b>  | 34.3185      | 34.3229      | 33.0949      | 32.9191      | 34.5116      | 34.0089      | 33.692       |
| <b>5'</b>  | 50.3916      | 50.6691      | 50.2733      | 50.1607      | 50.9479      | 49.3091      | 49.0341      |
| <b>6'</b>  | 46.3562      | 44.4465      | 43.2847      | 42.9983      | 45.9489      | 42.4235      | 41.9052      |
| <b>1''</b> | -4.0772      | -2.4         | -0.9625      | 0.4737       | -0.7391      | -3.8693      | -2.6819      |
| <b>2''</b> | 128.4821     | 128.5402     | 127.83       | 127.9628     | 128.7929     | 127.8722     | 128.2179     |

8a Shielding tensors mPW1PW91/6-311+G(2d,p)//B3LYP/6-31G(d) SCRF = (PCM, CHCl<sub>3</sub>)

|            | <b>8a-01</b> | <b>8a-02</b> | <b>8a-03</b> | <b>8a-04</b> | <b>8a-05</b> | <b>8a-06</b> | <b>8a-07</b> |
|------------|--------------|--------------|--------------|--------------|--------------|--------------|--------------|
| <b>1</b>   | 128.8008     | 128.631      | 130.0945     | 131.4085     | 129.5127     | 124.2144     | 123.2759     |
| <b>3</b>   | 126.6067     | 126.2065     | 127.1493     | 130.9445     | 124.2869     | 126.5478     | 123.41       |
| <b>4</b>   | 158.4903     | 159.6111     | 157.2159     | 162.8718     | 157.7357     | 157.3493     | 157.9574     |
| <b>4a</b>  | 74.749       | 74.1966      | 70.6775      | 71.6895      | 70.0198      | 73.0284      | 72.8509      |
| <b>4b</b>  | 54.8682      | 54.6736      | 54.3068      | 54.9095      | 54.7157      | 54.2965      | 54.2521      |
| <b>5</b>   | 63.7457      | 63.9174      | 63.769       | 63.3869      | 64.5419      | 63.7035      | 64.2581      |
| <b>6</b>   | 63.0643      | 63.0679      | 62.4931      | 63.1564      | 62.9528      | 63.0558      | 62.9474      |
| <b>7</b>   | 60.7119      | 60.4293      | 60.0323      | 60.4268      | 60.0813      | 60.7857      | 60.2752      |
| <b>8</b>   | 71.8688      | 72.3443      | 71.8949      | 72.7729      | 72.3147      | 71.7859      | 72.5691      |
| <b>8a</b>  | 47.4256      | 46.7802      | 46.2555      | 45.7969      | 46.3347      | 46.8406      | 46.7972      |
| <b>9a</b>  | 46.7937      | 47.6779      | 48.525       | 50.9224      | 48.3821      | 47.7027      | 47.711       |
| <b>1'</b>  | 40.6819      | 40.3588      | 42.6578      | 41.4363      | 42.66        | 43.9172      | 44.6316      |
| <b>2'</b>  | 41.3231      | 41.0947      | 37.7828      | 39.2194      | 37.4953      | 39.0714      | 39.3459      |
| <b>3'</b>  | 52.2075      | 52.2374      | 51.1903      | 51.6012      | 51.1011      | 49.7861      | 50.0359      |
| <b>4'</b>  | 40.1882      | 40.0079      | 39.3795      | 39.6614      | 39.2647      | 38.6365      | 38.5294      |
| <b>5'</b>  | 53.5334      | 53.4693      | 53.8359      | 54.3839      | 53.8799      | 53.8365      | 53.7751      |
| <b>6'</b>  | 49.3746      | 49.4623      | 50.5383      | 49.2015      | 50.781       | 46.2711      | 46.5506      |
| <b>1''</b> | 4.1243       | 6.117        | 2.8214       | 2.3522       | 5.6521       | 2.769        | 5.527        |
| <b>2''</b> | 132.3265     | 132.4534     | 132.5321     | 133.4658     | 132.952      | 132.6561     | 132.8171     |
|            | <b>8a-08</b> | <b>8a-09</b> | <b>8a-10</b> | <b>8a-11</b> | <b>8a-12</b> | <b>8a-13</b> | <b>8a-14</b> |
| <b>1</b>   | 131.4335     | 131.8371     | 122.1166     | 121.7828     | 131.9493     | 127.7972     | 127.138      |
| <b>3</b>   | 130.6591     | 130.3783     | 125.6938     | 125.5757     | 129.6685     | 128.8829     | 128.8637     |
| <b>4</b>   | 162.5668     | 161.4826     | 158.9089     | 160.128      | 160.9532     | 162.6862     | 162.7855     |
| <b>4a</b>  | 71.0357      | 70.3839      | 72.2884      | 72.616       | 70.0054      | 72.8536      | 72.7086      |
| <b>4b</b>  | 55.182       | 54.8015      | 54.6713      | 54.2045      | 54.6503      | 54.5511      | 54.2972      |
| <b>5</b>   | 64.043       | 63.7982      | 63.9191      | 63.5748      | 64.0966      | 64.4012      | 64.1092      |
| <b>6</b>   | 63.2909      | 63.3454      | 63.0337      | 62.6548      | 63.3751      | 63.0846      | 63.1562      |
| <b>7</b>   | 60.388       | 60.354       | 60.9324      | 60.6467      | 60.4437      | 60.3299      | 60.5165      |
| <b>8</b>   | 71.8918      | 72.4522      | 71.9329      | 72.2064      | 72.1089      | 72.6017      | 72.3065      |
| <b>8a</b>  | 45.6658      | 45.7925      | 46.4695      | 46.5098      | 45.9663      | 45.4627      | 45.4128      |
| <b>9a</b>  | 49.2525      | 49.3793      | 47.5378      | 48.5063      | 49.0854      | 50.6146      | 50.6326      |
| <b>1'</b>  | 39.7927      | 42.0795      | 43.4512      | 43.0267      | 41.4883      | 40.6651      | 40.5927      |
| <b>2'</b>  | 39.2503      | 37.8459      | 37.4574      | 36.8496      | 37.5878      | 38.8794      | 38.8597      |
| <b>3'</b>  | 51.5772      | 51.541       | 49.2051      | 49.3308      | 51.2872      | 49.8859      | 50.2765      |
| <b>4'</b>  | 40.1055      | 40.1325      | 38.8594      | 38.7059      | 40.2671      | 39.863       | 39.4926      |
| <b>5'</b>  | 54.8944      | 55.1234      | 54.7891      | 54.6583      | 55.4402      | 53.9269      | 53.6831      |
| <b>6'</b>  | 50.7203      | 48.9345      | 47.6447      | 47.4259      | 50.4072      | 46.937       | 46.443       |
| <b>1''</b> | 1.6528       | 3.2853       | 4.4296       | 5.8893       | 4.9145       | 1.7209       | 2.934        |
| <b>2''</b> | 133.1355     | 133.232      | 132.4536     | 132.588      | 133.4543     | 132.554      | 132.8777     |

**8b-01**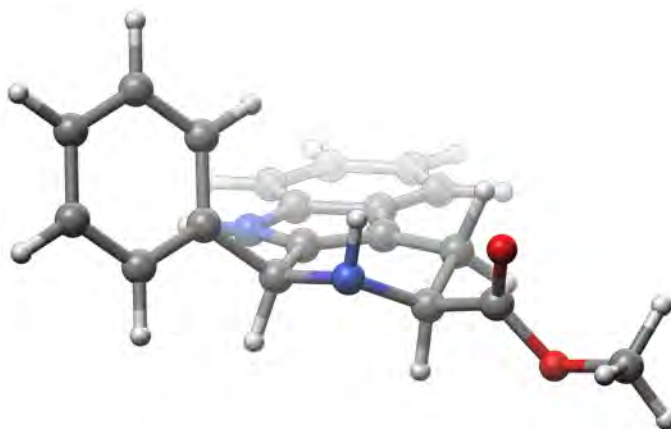

|   |             |             |             |   |             |             |             |
|---|-------------|-------------|-------------|---|-------------|-------------|-------------|
| C | 0.00000000  | 0.00000000  | 0.00000000  | H | -4.92521000 | -0.98405400 | -0.32092900 |
| C | 1.23656700  | 0.79633800  | -0.29391500 | H | -3.89805200 | -1.96894600 | 0.74752500  |
| C | 2.62904800  | 0.44138500  | -0.19374600 | H | -4.22996900 | -2.52399500 | -0.92801900 |
| C | 3.32355900  | -0.70667700 | 0.22261200  | H | -1.44451500 | 2.36198700  | 0.38711100  |
| H | 2.78164300  | -1.58516400 | 0.56397900  | C | -0.09362100 | 4.27001400  | -0.57373500 |
| C | 4.71330900  | -0.70298500 | 0.19627800  | C | -0.65170800 | 5.29351200  | -1.34819600 |
| C | 5.42930800  | 0.42976000  | -0.23966400 | C | -0.70405600 | 6.60260300  | -0.86797800 |
| C | 4.77052900  | 1.57984500  | -0.66304800 | C | -0.19948500 | 6.90336700  | 0.39854400  |
| C | 3.37318600  | 1.57135600  | -0.63934800 | C | 0.35598500  | 5.88900700  | 1.18075900  |
| N | 2.46399100  | 2.54720600  | -1.00511600 | C | 0.40944600  | 4.58105200  | 0.69691200  |
| H | 2.69218800  | 3.50050600  | -1.24345300 | H | 0.84941300  | 3.79495100  | 1.30579700  |
| C | 1.18084500  | 2.08111000  | -0.77004300 | H | 0.75043600  | 6.11537300  | 2.16784700  |
| C | -0.08290800 | 2.83668500  | -1.09207200 | H | -0.23788800 | 7.92262600  | 0.77352400  |
| H | -0.18205400 | 2.88618300  | -2.18880000 | H | -1.13894700 | 7.38652700  | -1.48235000 |
| N | -1.27207100 | 2.12354100  | -0.58816800 | H | -1.05228200 | 5.05885500  | -2.33158300 |
| C | -1.21175500 | 0.66716000  | -0.71903200 | H | 5.32425000  | 2.45165600  | -1.00238900 |
| H | -1.15748400 | 0.42128100  | -1.78537000 | H | 6.51561700  | 0.40491600  | -0.24758800 |
| C | -2.49995000 | 0.09693900  | -0.14600700 | H | 5.25955700  | -1.58564300 | 0.51779000  |
| O | -3.07101000 | 0.54163900  | 0.82673000  | H | -0.20030500 | -0.04260200 | 1.08117400  |
| O | -2.89567700 | -1.00586100 | -0.81354200 | H | 0.09972000  | -1.03888500 | -0.34109600 |
| C | -4.06503500 | -1.65763700 | -0.28704100 |   |             |             |             |



**8b-02**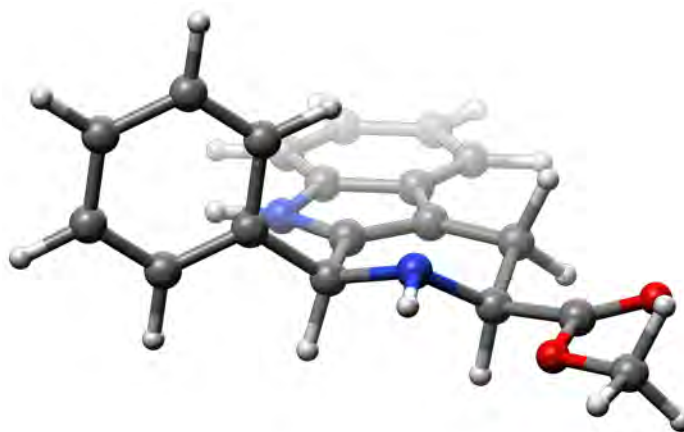

|   |             |             |             |   |             |             |             |
|---|-------------|-------------|-------------|---|-------------|-------------|-------------|
| C | 0.00000000  | 0.00000000  | 0.00000000  | H | -4.92804800 | -0.39824700 | 0.82554400  |
| C | 1.13722600  | 0.94167000  | -0.26548400 | H | -4.93226400 | -1.17943700 | -0.77372800 |
| C | 2.56191700  | 0.76242600  | -0.15657400 | H | -5.66255800 | 0.44947100  | -0.57663100 |
| C | 3.39107100  | -0.30455600 | 0.22791100  | H | -2.34940200 | 2.29523400  | -0.63142500 |
| H | 2.95989500  | -1.25626800 | 0.52821800  | C | -0.51869000 | 4.27433300  | -0.46596800 |
| C | 4.76946200  | -0.12515800 | 0.22324000  | C | -0.44956500 | 5.35374900  | -1.35326000 |
| C | 5.34170000  | 1.10431900  | -0.15997200 | C | -0.50673400 | 6.66868200  | -0.88220200 |
| C | 4.54790200  | 2.17781500  | -0.55180200 | C | -0.64001600 | 6.91343000  | 0.48411100  |
| C | 3.16271500  | 1.99339800  | -0.54905200 | C | -0.71490700 | 5.83919200  | 1.37626400  |
| N | 2.14247100  | 2.86060600  | -0.89714300 | C | -0.65137600 | 4.52886900  | 0.90608500  |
| H | 2.24611000  | 3.84869300  | -1.07366300 | H | -0.71552600 | 3.68820200  | 1.58967000  |
| C | 0.93017000  | 2.22473900  | -0.69871500 | H | -0.82194200 | 6.02483400  | 2.44188000  |
| C | -0.41197200 | 2.84437200  | -0.98304200 | H | -0.68958400 | 7.93430800  | 0.85352700  |
| H | -0.54457100 | 2.88292000  | -2.08425400 | H | -0.45591900 | 7.49703400  | -1.58406200 |
| N | -1.42325500 | 1.98522900  | -0.34854400 | H | -0.36221000 | 5.16526100  | -2.42171400 |
| C | -1.26390800 | 0.56050300  | -0.67306200 | H | 4.99095700  | 3.12454300  | -0.85060600 |
| H | -1.16771600 | 0.40388800  | -1.76797800 | H | 6.42251700  | 1.21654000  | -0.15162700 |
| C | -2.50598500 | -0.22009100 | -0.25571300 | H | 5.41919600  | -0.94385600 | 0.52072100  |
| O | -2.50332800 | -1.31582300 | 0.25773100  | H | -0.18599600 | -0.11655900 | 1.07551600  |
| O | -3.63773700 | 0.44761600  | -0.58150500 | H | 0.20098400  | -1.00399700 | -0.39093700 |
| C | -4.86727400 | -0.22159300 | -0.25130000 |   |             |             |             |

**8b-03**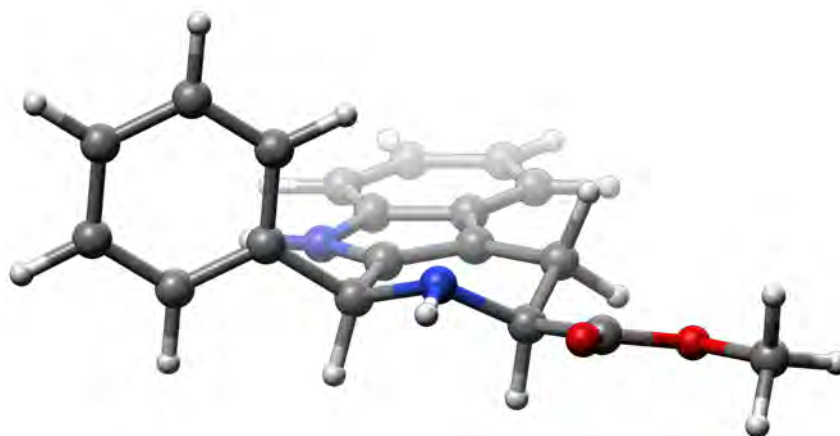

|   |             |             |             |   |             |             |             |
|---|-------------|-------------|-------------|---|-------------|-------------|-------------|
| C | 0.00000000  | 0.00000000  | 0.00000000  | H | 4.67017500  | -1.02758100 | -0.80031800 |
| C | -1.48004000 | -0.03249700 | -0.25225900 | H | 4.35153400  | -0.97320200 | 0.94993500  |
| C | -2.48466500 | 0.99169700  | -0.12848700 | H | 4.58451200  | 0.55727400  | 0.04020000  |
| C | -2.47149200 | 2.33890800  | 0.26996700  | H | 0.42340400  | -3.25123500 | -0.59857400 |
| H | -1.54168900 | 2.81514100  | 0.57119500  | C | -2.25261400 | -3.66915400 | -0.46631900 |
| C | -3.66372000 | 3.05362100  | 0.27832900  | C | -2.99796900 | -4.46111200 | -1.34645000 |
| C | -4.87707400 | 2.44886000  | -0.10610400 | C | -3.76897200 | -5.52495800 | -0.86921900 |
| C | -4.92221100 | 1.11863900  | -0.51177500 | C | -3.79459100 | -5.80850800 | 0.49587700  |
| C | -3.72173300 | 0.40358400  | -0.52158200 | C | -3.04756700 | -5.02449000 | 1.38047600  |
| N | -3.46174100 | -0.90615700 | -0.88360200 | C | -2.28447700 | -3.95997700 | 0.90438800  |
| H | -4.15682700 | -1.61509000 | -1.06428300 | H | -1.69470400 | -3.35033700 | 1.58157100  |
| C | -2.11651300 | -1.16319800 | -0.69469200 | H | -3.06087900 | -5.24444400 | 2.44484700  |
| C | -1.45077300 | -2.48290800 | -0.98954600 | H | -4.38841100 | -6.63831700 | 0.86995200  |
| H | -1.38264300 | -2.59301400 | -2.09226500 | H | -4.33907400 | -6.13451800 | -1.56548700 |
| N | -0.12612000 | -2.42756300 | -0.36502200 | H | -2.96499100 | -4.25319500 | -2.41439500 |
| C | 0.62716400  | -1.22177500 | -0.70171500 | H | -5.85833900 | 0.65419600  | -0.81139700 |
| H | 0.61400500  | -1.01444900 | -1.79309200 | H | -5.79418800 | 3.03138500  | -0.08767800 |
| C | 2.09126200  | -1.46450200 | -0.35787100 | H | -3.66367400 | 4.09557400  | 0.58705900  |
| O | 2.59186200  | -2.56301500 | -0.23680000 | H | 0.22353700  | -0.04169300 | 1.07505700  |
| O | 2.78243700  | -0.31305200 | -0.26041200 | H | 0.45681000  | 0.91829600  | -0.38526600 |
| C | 4.18987100  | -0.45812000 | -0.00034400 |   |             |             |             |

**8b-04**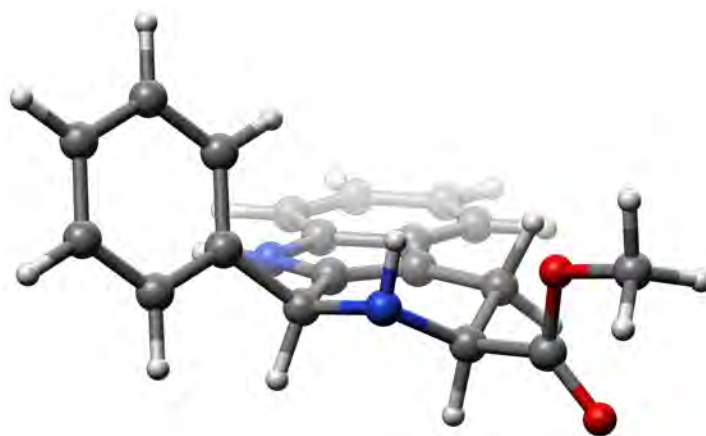

|   |             |             |             |   |             |             |             |
|---|-------------|-------------|-------------|---|-------------|-------------|-------------|
| C | 0.00000000  | 0.00000000  | 0.00000000  | H | -3.58647600 | -2.35299400 | 1.26145000  |
| C | 0.95479800  | 1.14645000  | -0.16267700 | H | -4.80819900 | -1.34162400 | 0.45424900  |
| C | 2.38276200  | 1.21128400  | 0.01347800  | H | -4.33317800 | -0.98092500 | 2.14755300  |
| C | 3.36554800  | 0.29261400  | 0.41861900  | H | -2.01938200 | 1.80474200  | 0.47021900  |
| H | 3.09308600  | -0.72742700 | 0.67788300  | C | -1.33436300 | 4.09481100  | -0.38173200 |
| C | 4.69066300  | 0.70649900  | 0.48630300  | C | -2.18682100 | 4.91143400  | -1.13444700 |
| C | 5.05820700  | 2.02631900  | 0.15599200  | C | -2.65292700 | 6.12122000  | -0.61970800 |
| C | 4.10940600  | 2.95765700  | -0.25400800 | C | -2.27291300 | 6.52915900  | 0.66063300  |
| C | 2.77839100  | 2.53707000  | -0.32517400 | C | -1.42730900 | 5.72032800  | 1.42167700  |
| N | 1.63936900  | 3.22478100  | -0.70245700 | C | -0.96059900 | 4.51095100  | 0.90332200  |
| H | 1.58652900  | 4.21511900  | -0.88671700 | H | -0.29649500 | 3.88739300  | 1.49684500  |
| C | 0.54278200  | 2.38740200  | -0.57849600 | H | -1.12737300 | 6.03094400  | 2.41908700  |
| C | -0.87316800 | 2.75534100  | -0.94322400 | H | -2.63257600 | 7.47276000  | 1.06220700  |
| H | -0.94351300 | 2.81896800  | -2.04089900 | H | -3.31171400 | 6.74512100  | -1.21790300 |
| N | -1.81582000 | 1.69688200  | -0.52246200 | H | -2.48930000 | 4.59100900  | -2.12853800 |
| C | -1.31291300 | 0.33668500  | -0.76314700 | H | 4.39501400  | 3.97423200  | -0.51242000 |
| H | -1.12386300 | 0.23896100  | -1.83711400 | H | 6.10180400  | 2.32221600  | 0.21978200  |
| C | -2.39470600 | -0.68197300 | -0.43334500 | H | 5.45808500  | 0.00377300  | 0.79941000  |
| O | -2.69070000 | -1.63226000 | -1.12226300 | H | -0.22991200 | -0.18610900 | 1.05939300  |
| O | -2.96071000 | -0.42244200 | 0.76818500  | H | 0.42313400  | -0.93274500 | -0.39622200 |
| C | -3.98858000 | -1.33992800 | 1.17738500  |   |             |             |             |

8b-05

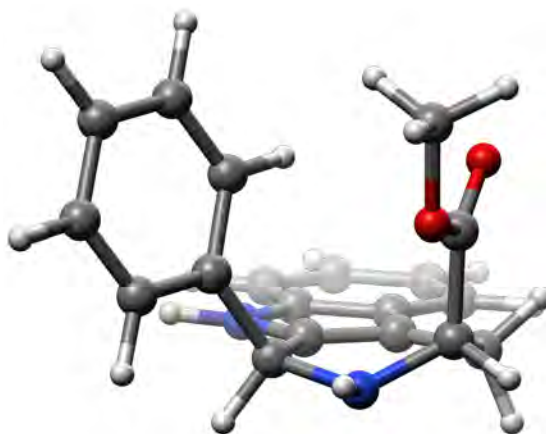

|   |             |             |             |   |             |             |             |
|---|-------------|-------------|-------------|---|-------------|-------------|-------------|
| C | 0.0000000   | 0.0000000   | 0.0000000   | H | -4.24960100 | -0.94088700 | -2.75127900 |
| C | 0.55710200  | -1.37024100 | -0.23665700 | H | -4.17700800 | 0.84097200  | -2.76744500 |
| C | 1.83462700  | -1.79169400 | -0.75137300 | H | -5.44454700 | 0.00497500  | -1.80679300 |
| C | 2.97403700  | -1.11863000 | -1.22216300 | H | -2.92136800 | -1.15749300 | 1.19127400  |
| H | 3.00360200  | -0.03214400 | -1.24005000 | C | -2.53636600 | -3.28461600 | -0.27002000 |
| C | 4.06109700  | -1.86060900 | -1.66938900 | C | -3.60279900 | -3.97668000 | 0.32061000  |
| C | 4.03503900  | -3.26940900 | -1.65501100 | C | -4.56188700 | -4.62231500 | -0.46076600 |
| C | 2.92284600  | -3.96532100 | -1.19173800 | C | -4.46106300 | -4.59363700 | -1.85276900 |
| C | 1.83254000  | -3.21586600 | -0.74158500 | C | -3.39684000 | -3.91687400 | -2.45310600 |
| N | 0.61603900  | -3.62415000 | -0.22654300 | C | -2.44048600 | -3.26845600 | -1.66896400 |
| H | 0.28337100  | -4.57561900 | -0.19516500 | H | -1.61552700 | -2.74684800 | -2.14519100 |
| C | -0.14743600 | -2.50423100 | 0.06275900  | H | -3.30350200 | -3.89999400 | -3.53606800 |
| C | -1.52869400 | -2.56046900 | 0.63539100  | H | -5.20094600 | -5.10238900 | -2.46502300 |
| H | -1.49488500 | -3.13391100 | 1.57502000  | H | -5.38024000 | -5.15489100 | 0.01694000  |
| N | -1.91631500 | -1.18588700 | 1.04066700  | H | -3.67904400 | -4.01406700 | 1.40614300  |
| C | -1.52701200 | -0.06437000 | 0.17169900  | H | 2.90501400  | -5.05226400 | -1.17980200 |
| H | -1.85837700 | 0.83820100  | 0.70256900  | H | 4.89892600  | -3.82366100 | -2.01188900 |
| C | -2.26257400 | -0.01396700 | -1.18169700 | H | 4.94643100  | -1.34921700 | -2.03745100 |
| O | -1.75958300 | 0.09335700  | -2.27866700 | H | 0.23652100  | 0.67041200  | -0.83271200 |
| O | -3.59994100 | -0.06486100 | -0.97619200 | H | 0.43180000  | 0.44227200  | 0.90800700  |
| C | -4.41371700 | -0.03636800 | -2.16019100 |   |             |             |             |

8b-06

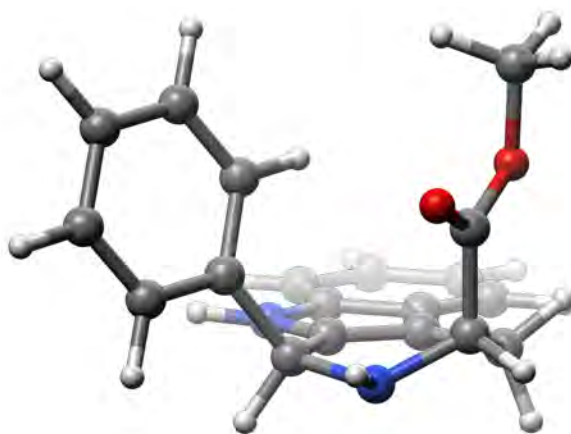

|   |             |             |             |   |             |             |             |
|---|-------------|-------------|-------------|---|-------------|-------------|-------------|
| C | 0.00000000  | 0.00000000  | 0.00000000  | H | 2.88599300  | 1.87409800  | 3.28591500  |
| C | -0.45519400 | -1.35441300 | 0.44692600  | H | 2.82538200  | 0.16780900  | 3.78511100  |
| C | -1.70290800 | -1.79591000 | 1.01514500  | H | 1.45317800  | 1.25948700  | 4.17853000  |
| C | -2.89957200 | -1.15556700 | 1.37699200  | H | 3.05892800  | -1.06337000 | -0.87471600 |
| H | -3.01842300 | -0.08526300 | 1.22802000  | C | 2.76270600  | -3.04764300 | 0.75679800  |
| C | -3.92923000 | -1.90844500 | 1.92977200  | C | 3.85880100  | -3.76789000 | 0.26427000  |
| C | -3.78921500 | -3.29645000 | 2.12840700  | C | 4.83663200  | -4.26643300 | 1.12617900  |
| C | -2.61846000 | -3.96069700 | 1.77596300  | C | 4.72427400  | -4.05957400 | 2.50167400  |
| C | -1.58642000 | -3.20101500 | 1.21854500  | C | 3.63007400  | -3.35340000 | 3.00586100  |
| N | -0.33479500 | -3.58161000 | 0.77081300  | C | 2.65701500  | -2.85243000 | 2.14089100  |
| H | 0.07799800  | -4.49396000 | 0.89104700  | H | 1.80427900  | -2.30978300 | 2.54047200  |
| C | 0.34186100  | -2.45948000 | 0.32054000  | H | 3.53133000  | -3.19637100 | 4.07704200  |
| C | 1.73124900  | -2.49148800 | -0.23479500 | H | 5.48031800  | -4.45114800 | 3.17696700  |
| H | 1.74325900  | -3.17293600 | -1.09997700 | H | 5.68001300  | -4.82200000 | 0.72440300  |
| N | 2.04783800  | -1.15191800 | -0.79867800 | H | 3.94517200  | -3.94199000 | -0.80691500 |
| C | 1.53438500  | 0.03945000  | -0.10783600 | H | -2.51304200 | -5.03206500 | 1.92722600  |
| H | 1.80599200  | 0.88506600  | -0.75523100 | H | -4.61037800 | -3.85968600 | 2.56344100  |
| C | 2.30349600  | 0.33516200  | 1.19580400  | H | -4.85858700 | -1.42207500 | 2.21367300  |
| O | 3.51490200  | 0.29446000  | 1.25176800  | H | -0.33957900 | 0.78283800  | 0.68497100  |
| O | 1.52320800  | 0.68694300  | 2.23770400  | H | -0.41436400 | 0.23880400  | -0.98923400 |
| C | 2.22630800  | 1.01770500  | 3.44878600  |   |             |             |             |

8b-07

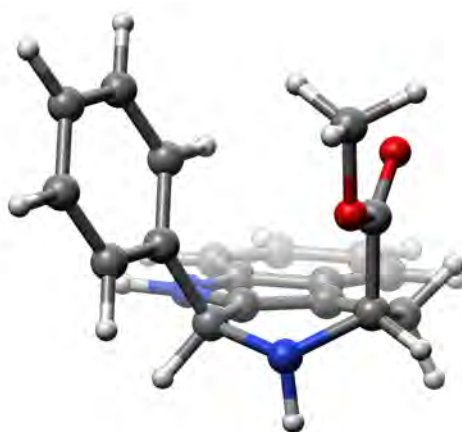

|   |             |             |             |   |             |             |             |
|---|-------------|-------------|-------------|---|-------------|-------------|-------------|
| C | 0.00000000  | 0.00000000  | 0.00000000  | H | -4.32548200 | -1.24624700 | -2.44005900 |
| C | 0.60719000  | -1.36697200 | -0.10757700 | H | -4.29559700 | 0.52770600  | -2.61677500 |
| C | 1.90653300  | -1.77785800 | -0.57428500 | H | -5.51459400 | -0.24420600 | -1.54608000 |
| C | 3.02458000  | -1.09940700 | -1.08702800 | H | -1.48466500 | -0.94259700 | 2.12472900  |
| H | 3.01023000  | -0.01785000 | -1.19528800 | C | -2.47811700 | -3.25688100 | -0.02225500 |
| C | 4.14673800  | -1.83014000 | -1.45977400 | C | -3.69826400 | -3.63778200 | 0.55411300  |
| C | 4.17701200  | -3.23294200 | -1.32959100 | C | -4.66574900 | -4.30164500 | -0.19580400 |
| C | 3.08716100  | -3.93359300 | -0.82240100 | C | -4.42776900 | -4.59565600 | -1.54235200 |
| C | 1.96124400  | -3.19525400 | -0.44755600 | C | -3.22095700 | -4.21446800 | -2.12721000 |
| N | 0.75468300  | -3.60871400 | 0.08737800  | C | -2.25014400 | -3.54919300 | -1.37076900 |
| H | 0.46265400  | -4.56747000 | 0.19915800  | H | -1.31927800 | -3.24441400 | -1.83872000 |
| C | -0.05749800 | -2.50071400 | 0.27943900  | H | -3.02797900 | -4.43299400 | -3.17432800 |
| C | -1.44435900 | -2.53902700 | 0.85547800  | H | -5.17943600 | -5.11797500 | -2.12854600 |
| H | -1.41731700 | -3.08898200 | 1.80773900  | H | -5.60494100 | -4.59249800 | 0.26782600  |
| N | -1.89787900 | -1.17410900 | 1.22351200  | H | -3.88856300 | -3.39756300 | 1.59729700  |
| C | -1.51786400 | -0.10129300 | 0.28392900  | H | 3.11255100  | -5.01580100 | -0.72188900 |
| H | -1.85554200 | 0.82883800  | 0.75876300  | H | 5.06703000  | -3.77862700 | -1.63114800 |
| C | -2.32788300 | -0.19237000 | -1.01959700 | H | 5.01566300  | -1.31472000 | -1.85993100 |
| O | -1.85391400 | -0.19427200 | -2.13593500 | H | 0.15785700  | 0.57293600  | -0.92009000 |
| O | -3.64879700 | -0.20292200 | -0.76833400 | H | 0.47360800  | 0.57090500  | 0.81321900  |
| C | -4.49395800 | -0.29652500 | -1.92627800 |   |             |             |             |

8b-08

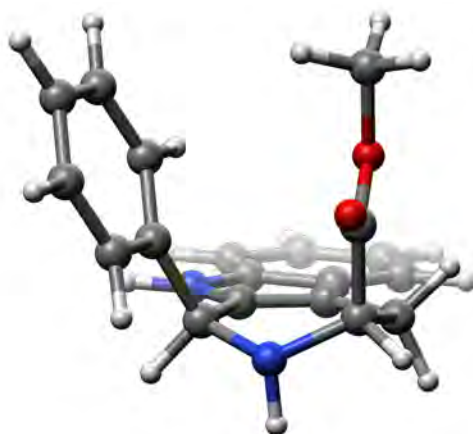

|   |             |             |             |   |             |             |             |
|---|-------------|-------------|-------------|---|-------------|-------------|-------------|
| C | 0.00000000  | 0.00000000  | 0.00000000  | H | 3.18612000  | 0.52352300  | 3.32691300  |
| C | -0.58084800 | -1.37589600 | 0.13555600  | H | 3.42556500  | -1.22578800 | 3.08338000  |
| C | -1.87758300 | -1.79818900 | 0.59760600  | H | 2.01262400  | -0.64404700 | 4.02627400  |
| C | -3.00741200 | -1.12909400 | 1.09736500  | H | 1.42897000  | -0.97038400 | -2.15098100 |
| H | -3.00679000 | -0.04656800 | 1.19766600  | C | 2.56584700  | -3.15365800 | 0.06449400  |
| C | -4.12481200 | -1.86965700 | 1.46499700  | C | 3.88084900  | -3.20080000 | -0.42007000 |
| C | -4.13911100 | -3.27346100 | 1.34272100  | C | 4.89471400  | -3.79485400 | 0.32687800  |
| C | -3.03727400 | -3.96524300 | 0.84932900  | C | 4.61123800  | -4.35227300 | 1.57731400  |
| C | -1.91627700 | -3.21698000 | 0.47955500  | C | 3.30886100  | -4.30281100 | 2.07187800  |
| N | -0.69943800 | -3.61990600 | -0.03977800 | C | 2.29154200  | -3.70543300 | 1.31996800  |
| H | -0.41320400 | -4.57524300 | -0.18886700 | H | 1.28479200  | -3.66052900 | 1.72347100  |
| C | 0.10068500  | -2.50386200 | -0.23896600 | H | 3.07810200  | -4.72649700 | 3.04616600  |
| C | 1.48479600  | -2.52063000 | -0.82471400 | H | 5.40164300  | -4.81657300 | 2.16125400  |
| H | 1.46482200  | -3.11358600 | -1.75209100 | H | 5.90901200  | -3.81852800 | -0.06282100 |
| N | 1.88101900  | -1.16021000 | -1.25869600 | H | 4.10383300  | -2.74379000 | -1.37966000 |
| C | 1.51217800  | -0.06315000 | -0.33953900 | H | -3.05047700 | -5.04819700 | 0.75465400  |
| H | 1.79457100  | 0.85466500  | -0.86652300 | H | -5.02609700 | -3.82682800 | 1.63903300  |
| C | 2.45942000  | -0.07952600 | 0.87321100  | H | -5.00295800 | -1.36119500 | 1.85378400  |
| O | 3.63646500  | 0.19039500  | 0.80098000  | H | -0.15281300 | 0.58736600  | 0.91255700  |
| O | 1.83391500  | -0.39443500 | 2.02666100  | H | -0.51136600 | 0.54943200  | -0.80570800 |
| C | 2.67890900  | -0.43479000 | 3.18876300  |   |             |             |             |

8b Shielding tensors B3LYP/6-311+G(2d,p)//B3LYP/6-31G(d) SCRF = (PCM, CHCl<sub>3</sub>)

|            | <b>8b-01</b> | <b>8b-02</b> | <b>8b-03</b> | <b>8b-04</b> | <b>8b-05</b> | <b>8b-06</b> | <b>8b-07</b> | <b>8b-08</b> |
|------------|--------------|--------------|--------------|--------------|--------------|--------------|--------------|--------------|
| <b>1</b>   | 119.7767     | 116.7167     | 117.2034     | 118.7587     | 120.9346     | 121.3299     | 122.8195     | 123.6806     |
| <b>3</b>   | 120.8299     | 119.6897     | 120.1121     | 117.4989     | 124.9719     | 124.0013     | 123.9525     | 122.6274     |
| <b>4</b>   | 151.5696     | 154.201      | 153.2238     | 152.3809     | 157.8562     | 157.8366     | 156.4641     | 155.7107     |
| <b>4a</b>  | 66.6307      | 69.4623      | 69.3968      | 66.3085      | 66.5976      | 66.5505      | 66.3663      | 67.4106      |
| <b>4b</b>  | 48.4866      | 47.7594      | 48.5007      | 48.4502      | 48.7576      | 49.3057      | 48.4298      | 48.2199      |
| <b>5</b>   | 59.0301      | 58.6664      | 60.6549      | 60.0507      | 59.2215      | 59.5067      | 59.1388      | 59.3529      |
| <b>6</b>   | 58.5358      | 58.7008      | 57.9704      | 58.191       | 58.9695      | 58.9859      | 59.0201      | 59.0033      |
| <b>7</b>   | 56.4706      | 56.886       | 56.4583      | 56.2697      | 56.4208      | 56.4097      | 56.3884      | 56.4632      |
| <b>8</b>   | 67.6033      | 68.2479      | 68.6529      | 67.8316      | 68.0768      | 68.264       | 67.637       | 67.8087      |
| <b>8a</b>  | 41.3169      | 40.6981      | 39.8707      | 40.6168      | 40.204       | 40.0269      | 40.9205      | 41.5086      |
| <b>9a</b>  | 41.1077      | 39.3535      | 38.7588      | 41.3257      | 44.3214      | 43.7245      | 44.6593      | 43.5052      |
| <b>1'</b>  | 32.9148      | 32.0619      | 31.8827      | 32.4868      | 30.4629      | 30.0536      | 32.3461      | 33.0061      |
| <b>2'</b>  | 45.6805      | 49.0096      | 49.3291      | 45.2079      | 48.1062      | 47.8496      | 45.151       | 44.9841      |
| <b>3'</b>  | 48.7018      | 49.0245      | 49.3329      | 47.2503      | 47.7609      | 48.3507      | 48.6917      | 49.0691      |
| <b>4'</b>  | 48.5437      | 48.6599      | 48.4589      | 48.8474      | 49.2601      | 49.2213      | 50.0174      | 50.2085      |
| <b>5'</b>  | 48.2249      | 48.0041      | 47.6984      | 48.4579      | 48.5038      | 48.9875      | 49.9351      | 50.2461      |
| <b>6'</b>  | 48.96        | 47.9456      | 47.6448      | 50.8589      | 48.3642      | 48.9686      | 48.0688      | 49.8045      |
| <b>1''</b> | -2.9426      | 0.1264       | -1.5574      | -0.0947      | -3.4803      | -3.8975      | -1.4941      | 0.1212       |
| <b>2''</b> | 128.1357     | 127.9082     | 127.8355     | 128.3818     | 129.0169     | 128.5566     | 128.9634     | 129.1278     |



8b Shielding tensors mPW1PW91/6-311+G(2d,p)//B3LYP/6-31G(d) SCRF = (PCM, CHCl<sub>3</sub>)

|            | <b>8b-01</b> | <b>8b-02</b> | <b>8b-03</b> | <b>8b-04</b> | <b>8b-05</b> | <b>8b-06</b> | <b>8b-07</b> | <b>8b-08</b> |
|------------|--------------|--------------|--------------|--------------|--------------|--------------|--------------|--------------|
| <b>1</b>   | 125.6949     | 122.7393     | 123.1648     | 124.6905     | 126.9518     | 127.2819     | 128.6799     | 129.4753     |
| <b>3</b>   | 127.0067     | 125.7269     | 126.1043     | 123.9514     | 130.8401     | 129.9767     | 129.9018     | 128.8085     |
| <b>4</b>   | 157.002      | 159.5501     | 158.546      | 157.7749     | 162.9761     | 162.9768     | 161.6953     | 160.993      |
| <b>4a</b>  | 71.8495      | 74.758       | 74.6291      | 71.5913      | 71.8769      | 71.8119      | 71.5675      | 72.6384      |
| <b>4b</b>  | 53.9287      | 53.3765      | 54.0635      | 54.0342      | 54.3464      | 54.8247      | 54.0077      | 53.825       |
| <b>5</b>   | 63.0851      | 62.8529      | 64.6558      | 64.0441      | 63.2725      | 63.7023      | 63.2178      | 63.3829      |
| <b>6</b>   | 63.07        | 63.1802      | 62.4827      | 62.6236      | 63.4665      | 63.4372      | 63.4623      | 63.4426      |
| <b>7</b>   | 60.8418      | 61.2229      | 60.8362      | 60.576       | 60.8067      | 60.7146      | 60.7504      | 60.812       |
| <b>8</b>   | 71.7287      | 72.31        | 72.7105      | 71.9979      | 72.1076      | 72.4378      | 71.7854      | 71.9533      |
| <b>8a</b>  | 46.7232      | 46.1947      | 45.5798      | 46.2294      | 45.6892      | 45.5327      | 46.3896      | 47.0443      |
| <b>9a</b>  | 46.4416      | 44.8257      | 44.2283      | 46.6691      | 49.4593      | 48.7885      | 49.7149      | 48.7025      |
| <b>1'</b>  | 38.9117      | 37.9654      | 37.8286      | 38.2353      | 36.3509      | 36.027       | 38.1549      | 38.7511      |
| <b>2'</b>  | 50.1433      | 53.4788      | 53.8095      | 49.6321      | 52.6461      | 52.374       | 49.8421      | 49.7377      |
| <b>3'</b>  | 53.0525      | 53.4715      | 53.7511      | 51.735       | 52.3231      | 52.8444      | 53.1414      | 53.5085      |
| <b>4'</b>  | 52.9031      | 53.0358      | 52.8756      | 53.206       | 53.6335      | 53.611       | 54.3714      | 54.5791      |
| <b>5'</b>  | 52.6639      | 52.3986      | 52.1223      | 52.8558      | 52.9005      | 53.3711      | 54.3068      | 54.6726      |
| <b>6'</b>  | 53.2957      | 52.3842      | 52.0542      | 55.1676      | 52.9327      | 53.4384      | 52.6183      | 54.2846      |
| <b>1''</b> | 2.5772       | 5.5764       | 3.8428       | 5.4047       | 2.1842       | 1.7096       | 4.0984       | 5.7235       |
| <b>2''</b> | 132.7801     | 132.5492     | 132.4624     | 133.0071     | 133.6777     | 133.1967     | 133.6496     | 133.829      |
